# Supplementary material for: A metabologenomics strategy for rapid discovery of polyketides derived from modular polyketide synthases
Source: Royal Society of Chemistry journal article supplement (doi:10.1039/d4sc04174g), 2024-11-04
Supplement: d4sc04174g1.pdf [file d4sc04174g1.pdf]

## Supplementary Information

### **A Metabologenomics Strategy for Rapid Discovery of Polyketides Derived from Modular Polyketide Synthases**

Run-Zhou Liu<sup>1,2</sup>, Zhihan Zhang<sup>2</sup>, Min Li<sup>2</sup>, Lihan Zhang<sup>\*2,3,4</sup>

Address:

<sup>1</sup>Department of Chemistry, Fudan University, Shanghai 200433, China

<sup>2</sup>Key Laboratory of Precise Synthesis of Functional Molecules of Zhejiang Province, Department of Chemistry, School of Science and Research Center for Industries of the Future, Westlake University, Hangzhou 310030, China

<sup>3</sup>Institute of Natural Sciences, Westlake Institute for Advanced Study, Hangzhou 310024, China

<sup>4</sup>Westlake Laboratory of Life Sciences and Biomedicine, Hangzhou 310030, China

\* Corresponding author

Email: zhanglihan@westlake.edu.cn

## Table of Contents

### Supplementary Tables

- Supplementary Table 1.** Annotation of candidate ions screened by NegMDF window for oligomycins.
- Supplementary Table 2.** The BGC prediction of *S. cattleya* NRRL 8057 by antiSMASH 7.0.0.
- Supplementary Table 3.** Proposed biosynthetic gene cluster of cattlemycins.
- Supplementary Table 4.** Proposed biosynthetic gene cluster of butyrolactols.
- Supplementary Table 5.** Proposed biosynthetic gene cluster of cattleyatetronates.
- Supplementary Table 6.** Summary of polyketides characterized in *S. cattleya* NRRL 8057 in this work.
- Supplementary Table 7.** Annotation of candidate ions screened by NegMDF window for cattlemycins.
- Supplementary Table 8.** Annotation of candidate ions screened by NegMDF window for butyrolactols.
- Supplementary Table 9.** Annotation of candidate ions screened by NegMDF window for cattleyatetronates.
- Supplementary Table 10.** The NMR data of cattlemycins A (**1a**) and D (**1d**) in DMSO-*d*<sub>6</sub>.
- Supplementary Table 11.** The NMR data of butyrolactols A (**2a**) and B (**2b**) in DMSO-*d*<sub>6</sub>.
- Supplementary Table 12.** The NMR data of cattleyatetronate A (**3a**) in MeOH-*d*<sub>4</sub>.

### Supplementary Figures

- Supplementary Fig. 1.** The workflow for the structural prediction of T1PKs.
- Supplementary Fig. 2.** The  $\beta$ -elimination reactions observed in T1PKs.
- Supplementary Fig. 3.** The  $\alpha$ -elimination reactions observed in T1PKs.
- Supplementary Fig. 4.** The retro-aldol reactions observed in polyketides with 3-hydroxyl ketone.
- Supplementary Fig. 5.** Other CID-reactions observed in polyketides.
- Supplementary Fig. 6.** The retro-aldol reactions observed in polyketides with 3-hydroxyl acid.
- Supplementary Fig. 7.** In-source fragmentation of 8 polyketide standards.
- Supplementary Fig. 8.** In-source fragmentation mechanism in positive and negative ESI.
- Supplementary Fig. 9.** The definition of NegMDF window for oligomycins.
- Supplementary Fig. 10.** The NegMDF window definition and MS/MS features for cattlemycins.
- Supplementary Fig. 11.** The NegMDF window definition and MS/MS features for butyrolactols.
- Supplementary Fig. 12.** The definition of NegMDF window for cattleyatetronates.
- Supplementary Fig. 13.** Detection of cattleyatetronate ions in A3M crude culture of *S. cattleya*.
- Supplementary Fig. 14.** Proposed biosynthesis of cattleyatetronates.
- Supplementary Fig. 15.** Two types of tetronate biosynthesis.
- Supplementary Fig. 16.** Proposed biosynthesis of cattlemycins.
- Supplementary Fig. 17.** Proposed biosynthesis of butyrolactols.
- Supplementary Fig. 18.** Bioinformatic analysis of KR domains in cattlemycin BGC.
- Supplementary Fig. 19-30.** Proposed MS/MS fragmentation pathway of cattlemycins (**1a-1m**).
- Supplementary Fig. 31-35.** Proposed MS/MS fragmentation pathway of butyrolactols (**2a-3g**).
- Supplementary Fig. 36-37.** Proposed MS/MS fragmentation pathway of cattleyatetronates (**3a-3b**).
- Supplementary Fig. 38-49.** NMR spectra of cattlemycin A (**1a**) and D (**1d**).
- Supplementary Fig. 50-61.** NMR spectra of butyrolactol A (**2a**) and B (**2b**).
- Supplementary Fig. 62-67.** NMR spectra of cattleyatetronate A (**3a**).

### Supplementary Methods

### Supplementary References

### Supplementary Datasets

- Supplementary Datasets 1.** MS/MS database of bacterial T1PKs.
- Supplementary Datasets 2.** In-source fragmentation of bacterial T1PKs.

## Supplementary Tables.

**Supplementary Table 1.** Annotation of candidate ions screened by NegMDF window for oligomycins.

| RT/min | m/z      | Compounds              | Formula                                         | Ion type              | MS/MS pattern                                                                                                                                                           |
|--------|----------|------------------------|-------------------------------------------------|-----------------------|-------------------------------------------------------------------------------------------------------------------------------------------------------------------------|
| 3.03   | 817.4614 | x                      |                                                 |                       |                                                                                                                                                                         |
| 4.16   | 781.4381 | x                      |                                                 |                       |                                                                                                                                                                         |
| 5.72   | 795.4533 | x                      |                                                 |                       |                                                                                                                                                                         |
| 5.83   | 765.4429 | x                      |                                                 |                       |                                                                                                                                                                         |
| 6.00   | 747.4681 | x                      |                                                 |                       |                                                                                                                                                                         |
| 6.20   | 761.4844 | x                      |                                                 |                       |                                                                                                                                                                         |
| 6.44   | 775.5000 | x                      |                                                 |                       |                                                                                                                                                                         |
| 6.49   | 761.4844 | x                      |                                                 |                       |                                                                                                                                                                         |
| 7.22   | 823.5216 | oligomycin analogue 1  | C <sub>45</sub> H <sub>76</sub> O <sub>13</sub> | [M-H] <sup>-</sup>    | 805.5066, 777.4760, 721.4536, 703.4452, 675.4426, 607.3848, 579.3875, 567.3547, 243.1255, 223.1006, 195.1039, 179.1079, 157.1238, 141.0556, 113.0598, 97.0298, 71.0139  |
| 7.24   | 763.5001 | oligomycin analogue 2  | C <sub>43</sub> H <sub>72</sub> O <sub>11</sub> | [M-H] <sup>-</sup>    | 745.4896, 549.3794, 241.1066, 213.1146, 141.0553, 127.0407, 113.0619, 83.0490                                                                                           |
| 7.30   | 795.5249 | oligomycin analogue 3  | C <sub>44</sub> H <sub>76</sub> O <sub>12</sub> | [M-H] <sup>-</sup>    | 777.5149, 577.4129, 463.3463, 245.1033, 217.1083, 131.0356, 113.0606, 83.0504, 69.0346                                                                                  |
| 7.37   | 777.5155 | oligomycin analogue 4  | C <sub>44</sub> H <sub>74</sub> O <sub>11</sub> | [M-H] <sup>-</sup>    | 759.5019, 677.4641, 641.4455, 563.3943, 449.3266, 241.1084, 213.1129, 127.0404, 113.0608, 99.0452, 83.0505, 57.0348                                                     |
| 7.49   | 809.5409 | oligomycin analogue 5  | C <sub>45</sub> H <sub>78</sub> O <sub>12</sub> | [M-H] <sup>-</sup>    | 791.5254, 773.5199, 577.4104, 463.3409, 445.3318, 259.1180, 231.1235, 213.1142, 145.0503, 113.0607, 83.0500, 57.0342                                                    |
| 7.58   | 777.5153 | oligomycin analogue 6  | C <sub>44</sub> H <sub>74</sub> O <sub>11</sub> | [M-H] <sup>-</sup>    | 759.5002, 663.4404, 631.4597, 577.4103, 563.3990, 227.0915, 213.1115, 199.0980, 165.0930, 127.0405, 113.0607, 99.0451, 69.0355, 57.0345                                 |
| 7.58   | 823.5213 |                        |                                                 | [M+HCOO] <sup>-</sup> |                                                                                                                                                                         |
| 7.63   | 837.4999 | x                      |                                                 |                       |                                                                                                                                                                         |
| 7.65   | 791.5307 | oligomycin analogue 7  | C <sub>45</sub> H <sub>76</sub> O <sub>11</sub> | [M-H] <sup>-</sup>    | 773.0371, 691.4794, 679.3559, 577.4089, 463.3431, 241.1091, 213.1117, 127.0384, 113.0607, 99.0441, 83.0495                                                              |
| 7.70   | 731.4739 | x                      |                                                 |                       |                                                                                                                                                                         |
| 7.70   | 821.5065 | x                      |                                                 |                       |                                                                                                                                                                         |
| 7.72   | 765.5156 | oligomycin analogue 8  | C <sub>43</sub> H <sub>74</sub> O <sub>11</sub> | [M-H] <sup>-</sup>    | 747.5032, 577.4112, 463.3428, 445.3314, 215.0914, 187.0983, 153.0920, 125.0972, 101.0251, 57.0348                                                                       |
| 7.80   | 745.4920 | x                      |                                                 |                       |                                                                                                                                                                         |
| 7.80   | 791.5314 | oligomycin analogue 9  | C <sub>45</sub> H <sub>76</sub> O <sub>11</sub> | [M-H] <sup>-</sup>    | 773.5189, 691.4760, 577.4107, 559.3983, 463.3420, 327.1805, 241.1079, 213.1129, 141.0558, 127.0400, 113.0606, 99.0447, 83.0500, 57.0351                                 |
| 7.84   | 821.5057 | x                      |                                                 |                       |                                                                                                                                                                         |
| 8.01   | 805.5110 | oligomycin analogue 10 | C <sub>45</sub> H <sub>74</sub> O <sub>12</sub> | [M-H] <sup>-</sup>    | 691.4433, 673.4294, 651.4104, 627.3910, 589.3741, 577.4083, 549.3441, 531.3315, 503.3392, 491.3028, 463.3057, 243.1239, 179.1068, 141.0560, 113.0613, 101.0604, 57.0329 |
| 8.03   | 759.5042 | x                      |                                                 |                       |                                                                                                                                                                         |
| 8.08   | 807.5228 | oligomycin analogue 11 | C <sub>45</sub> H <sub>76</sub> O <sub>12</sub> | [M-H] <sup>-</sup>    | 761.4897, 693.4485, 653.4247, 591.3758, 573.3716, 213.1104, 163.0028, 141.0550, 127.0395, 113.0597, 99.0448                                                             |
| 8.14   | 805.5465 | oligomycin analogue 12 | C <sub>46</sub> H <sub>78</sub> O <sub>11</sub> | [M-H] <sup>-</sup>    | 691.4441, 591.4250, 571.3642, 531.3279, 477.3612, 241.1078, 213.1135, 141.0577, 127.0390, 113.0601, 99.0442, 71.0128, 57.0349                                           |
| 8.25   | 801.4792 | oligomycin analogue 13 | C <sub>45</sub> H <sub>70</sub> O <sub>12</sub> | [M-H] <sup>-</sup>    | 783.4675, 741.5144, 663.4102, 657.4337, 601.4078, 561.3826, 479.3387, 239.0922, 211.0970, 151.0763, 99.0448, 73.0289, 59.0139                                           |
| 8.29   | 807.5255 | oligomycin analogue 14 | C <sub>45</sub> H <sub>76</sub> O <sub>12</sub> | [M-H] <sup>-</sup>    | 727.5159, 687.4845, 619.4202, 591.4255, 551.3967, 509.3838, 215.0920, 187.0974, 153.0923, 125.0973, 101.0240, 99.0452, 59.0132, 57.0344                                 |
| 8.35   | 805.5107 | oligomycin analogue 15 | C <sub>45</sub> H <sub>74</sub> O <sub>12</sub> | [M-H] <sup>-</sup>    | 787.4972, 719.4377, 701.4270, 691.4428, 673.4311, 651.4112, 609.3974, 591.3899, 573.3787, 561.3805, 543.3684, 195.1018, 141.0556, 113.0609, 57.0341                     |
| 8.40   | 741.4792 | x                      |                                                 |                       |                                                                                                                                                                         |
| 8.45   | 805.5107 | oligomycin             | C <sub>45</sub> H <sub>74</sub> O <sub>12</sub> | [M-H] <sup>-</sup>    | 787.5000, 703.4415, 691.4415, 667.4225, 657.4396,                                                                                                                       |

|       |          |                        |                                                 |                                     |                                                                                                                                                                                                                                                                                   |
|-------|----------|------------------------|-------------------------------------------------|-------------------------------------|-----------------------------------------------------------------------------------------------------------------------------------------------------------------------------------------------------------------------------------------------------------------------------------|
|       |          | analogue 16            |                                                 |                                     | 639.4257, 587.3750, 571.3620, 549.3439, 543.3689, 531.3322, 519.3301, 503.3363, 491.3374, 195.1024, 177.0921, 141.0556, 129.0555, 113.0613, 101.0603, 71.0138, 59.0140                                                                                                            |
| 8.67  | 805.5101 | oligomycin analogue 17 | C <sub>45</sub> H <sub>74</sub> O <sub>12</sub> | [M-H] <sup>-</sup>                  | 725.4918, 703.4394, 617.4073, 589.4109, 571.3662, 543.3631, 531.3314, 507.3689, 215.0931, 195.1039, 187.0973, 141.0553, 125.0972, 113.0590, 101.0247, 57.0347                                                                                                                     |
| 8.67  | 835.5239 | oligomycin analogue 18 | C <sub>45</sub> H <sub>74</sub> O <sub>11</sub> | [M+HCOO] <sup>-</sup>               | 789.5159, 771.546, 703.4388, 675.4473, 647.4544, 635.4130, 593.4033, 175.1116, 141.0572, 113.0618, 57.0350                                                                                                                                                                        |
| 8.68  | 761.4842 | oligomycin analogue 19 | C <sub>43</sub> H <sub>70</sub> O <sub>11</sub> | [M-H] <sup>-</sup>                  | 545.3515, 505.3164, 141.0557, 129.0555, 113.0607, 101.0611, 57.0345                                                                                                                                                                                                               |
| 8.72  | 803.4948 | oligomycin analogue 20 | C <sub>45</sub> H <sub>72</sub> O <sub>12</sub> | [M-H] <sup>-</sup>                  | 649.3905, 587.3579, 559.3652, 547.3281, 223.0975, 195.1026, 153.0538, 113.0622, 101.0611                                                                                                                                                                                          |
| 8.92  | 775.4997 |                        |                                                 | [M-H] <sup>-</sup>                  | 757.4916, 673.4294, 661.4313, 655.4221, 627.4273, 621.4004, 571.3992, 559.3639, 533.3473, 531.3686, 519.3313, 505.3553, 491.3379, 449.3276, 427.3230, 243.1233, 209.0836, 185.0818, 141.0551, 129.0556, 121.0657, 113.0605, 101.0609, 71.0136, 59.0135                            |
| 8.92  | 821.5057 | oligomycin analogue 21 | C <sub>44</sub> H <sub>72</sub> O <sub>11</sub> | M+HCOO                              |                                                                                                                                                                                                                                                                                   |
| 9.11  | 775.5002 |                        |                                                 | [M-H] <sup>-</sup>                  | 673.4285, 661.4307, 655.4206, 627.4258, 621.3997, 573.3770, 559.3638, 531.3687, 519.3318, 491.3330, 449.3268, 195.1037, 185.0829, 167.0687, 141.0556, 135.0820, 129.0550, 113.0610, 101.0611, 99.0444, 71.0139, 59.0134                                                           |
| 9.11  | 821.5059 | oligomycin analogue 22 | C <sub>44</sub> H <sub>72</sub> O <sub>11</sub> | [M+HCOO] <sup>-</sup>               |                                                                                                                                                                                                                                                                                   |
| 9.18  | 775.5001 | oligomycin analogue 23 | C <sub>44</sub> H <sub>72</sub> O <sub>11</sub> | [M-H] <sup>-</sup>                  | 661.4318, 655.4166, 641.4391, 621.3999, 573.3778, 559.3632, 531.3663, 519.3306, 491.3374, 243.1267, 195.1023, 185.0818, 177.0913, 141.0559, 129.0553, 113.0607, 101.0614, 71.0148, 57.0345                                                                                        |
| 9.19  | 821.5061 |                        |                                                 | [M+HCOO] <sup>-</sup>               |                                                                                                                                                                                                                                                                                   |
| 9.29  | 789.5169 |                        |                                                 | [M-H] <sup>-</sup>                  | 771.5045, 687.4470, 675.4470, 669.4372, 641.4413, 635.4158, 585.4160, 573.3791, 545.3841, 533.3478, 505.3529, 487.3418, 463.3425, 243.1237, 223.0970, 195.1026, 185.0820, 177.0920, 167.0716, 141.0558, 129.0557, 113.0607, 101.0607, 99.0451, 81.0344, 71.0137, 59.0138, 57.0346 |
| 9.29  | 825.4924 |                        |                                                 | [H+Cl] <sup>-</sup>                 |                                                                                                                                                                                                                                                                                   |
| 9.29  | 835.5219 | oligomycin A (r221)    | C <sub>45</sub> H <sub>74</sub> O <sub>11</sub> | [M+HCOO] <sup>-</sup>               |                                                                                                                                                                                                                                                                                   |
| 9.29  | 771.5057 |                        |                                                 | [M-H <sub>2</sub> O-H] <sup>-</sup> |                                                                                                                                                                                                                                                                                   |
| 9.41  | 803.4950 | oligomycin analogue 24 | C <sub>45</sub> H <sub>72</sub> O <sub>12</sub> | [M-H] <sup>-</sup>                  | 689.4266, 633.4013, 315.3877, 587.3720, 575.3599, 549.3390, 187.0973, 141.0551, 129.0558, 73.0285                                                                                                                                                                                 |
| 9.46  | 805.5091 | oligomycin analogue 25 | C <sub>45</sub> H <sub>74</sub> O <sub>12</sub> | [M-H] <sup>-</sup>                  | 787.4944, 759.4989, 719.4353, 701.4238, 691.4410, 673.4329, 663.4456, 651.4084, 617.4037, 591.3859, 177.0934, 141.0567, 129.0561, 113.0609, 109.0285, 99.0456                                                                                                                     |
| 9.49  | 803.5313 | oligomycin analogue 26 | C <sub>46</sub> H <sub>76</sub> O <sub>11</sub> | [M-H] <sup>-</sup>                  | 701.4647, 689.4627, 683.4510, 655.4587, 649.4325, 599.4308, 587.3946, 559.4012, 547.3632, 541.3873, 519.3707, 243.1250, 141.0560, 129.0555, 113.0611, 101.0612, 71.0144, 57.0343                                                                                                  |
| 9.64  | 739.4633 | x                      |                                                 |                                     |                                                                                                                                                                                                                                                                                   |
| 9.64  | 787.5000 | oligomycin analogue 27 | C <sub>45</sub> H <sub>72</sub> O <sub>11</sub> | [M-H] <sup>-</sup>                  | 769.4994, 685.4285, 673.4318, 633.4040, 571.3630, 531.3295, 223.0976, 205.0115, 195.1013, 129.0556, 113.0619, 101.0606, 71.0147                                                                                                                                                   |
| 9.64  | 833.5060 |                        |                                                 | [M+HCOO] <sup>-</sup>               |                                                                                                                                                                                                                                                                                   |
| 9.80  | 773.5207 |                        |                                                 | [M-H] <sup>-</sup>                  | 755.5084, 687.4464, 659.4522, 641.4489, 619.4184, 557.4107, 573.3787, 545.3850, 533.3493, 505.3528, 463.3417, 267.2327, 195.1037, 157.1232, 141.0555, 113.0607, 109.0285, 99.0455, 85.0652, 81.0342, 57.0345                                                                      |
| 9.80  | 809.4987 | oligomycin C (r222)    | C <sub>45</sub> H <sub>74</sub> O <sub>10</sub> | [H+Cl] <sup>-</sup>                 |                                                                                                                                                                                                                                                                                   |
| 9.80  | 819.5264 |                        |                                                 | [M+HCOO] <sup>-</sup>               |                                                                                                                                                                                                                                                                                   |
| 9.81  | 725.4833 | x                      |                                                 |                                     |                                                                                                                                                                                                                                                                                   |
| 9.81  | 745.5017 | x                      |                                                 |                                     |                                                                                                                                                                                                                                                                                   |
| 9.86  | 787.4999 | oligomycin analogue 28 | C <sub>45</sub> H <sub>72</sub> O <sub>11</sub> | [M-H] <sup>-</sup>                  | 589.3720, 545.3843, 527.3713, 241.1087, 213.1116, 141.0537, 111.0450, 99.0449                                                                                                                                                                                                     |
| 9.86  | 823.4764 |                        |                                                 | [H+Cl] <sup>-</sup>                 |                                                                                                                                                                                                                                                                                   |
| 9.86  | 833.5057 |                        |                                                 | [M+HCOO] <sup>-</sup>               |                                                                                                                                                                                                                                                                                   |
| 10.17 | 723.4669 | x                      |                                                 |                                     |                                                                                                                                                                                                                                                                                   |

**Notes:** 61 candidate ions were obtained from the A3M culture. According to the MS/MS checking, 42 ions from 30 oligomycin analogues were marked in color.

**Supplementary Table 2.** The BGC prediction of *S. cattleya* NRRL 8057 by antiSMASH 7.0.0.

| Regions            | Type                            | Reported products                                                                     | This study                                    |
|--------------------|---------------------------------|---------------------------------------------------------------------------------------|-----------------------------------------------|
| Region 1.1         | butyrolactone                   |                                                                                       |                                               |
| Region 1.2         | T1PKS, lassopeptide             |                                                                                       |                                               |
| <b>Region 1.3</b>  | <b>T1PKS, CDPS</b>              |                                                                                       | cryptic                                       |
| Region 1.4         | terpene                         |                                                                                       |                                               |
| Region 1.5         | lanthipeptide-class-i           |                                                                                       |                                               |
| Region 1.6         | CDPS                            |                                                                                       |                                               |
| Region 1.7         | Ectoine                         |                                                                                       |                                               |
| Region 1.8         | lanthipeptide-class-iii         |                                                                                       |                                               |
| Region 1.9         | butyrolactone                   |                                                                                       |                                               |
| Region 1.10        | T3PKS                           |                                                                                       |                                               |
| Region 1.11        | NRPS                            |                                                                                       |                                               |
| Region 1.12        | lanthipeptide-class-i           |                                                                                       |                                               |
| Region 1.13        | terpene                         |                                                                                       |                                               |
| Region 1.14        | NRPS, T1PKS                     |                                                                                       |                                               |
| <b>Region 1.15</b> | <b>trans-T1PKS, NRPS</b>        | L-681.217 ( <b>1a</b> ) <sup>1</sup><br>demethyl L-681.217 ( <b>1b</b> ) <sup>2</sup> | new cattlemycin<br>congeners ( <b>1c-1m</b> ) |
| Region 1.16        | RiPP-like                       |                                                                                       |                                               |
| Region 1.17        | CDPS                            |                                                                                       |                                               |
| Region 1.18        | NI-siderophore                  |                                                                                       |                                               |
| Region 1.19        | terpene                         |                                                                                       |                                               |
| Region 1.20        | T3PKS, terpene                  |                                                                                       |                                               |
| Region 1.21        | NAPAA                           |                                                                                       |                                               |
| Region 1.22        | hgIE-KS, NRPS                   |                                                                                       |                                               |
| Region 1.23        | butyrolactone, T1PKS, NRPS-like |                                                                                       |                                               |
| Region 2.1         | LAP                             |                                                                                       |                                               |
| Region 2.2         | NRPS                            |                                                                                       |                                               |
| Region 2.3         | Terpene                         |                                                                                       |                                               |
| Region 2.4         | thiopeptide, thiamitides, NRPS  |                                                                                       |                                               |
| Region 2.5         | terpene, ranthipeptide          |                                                                                       |                                               |
| <b>Region 2.6</b>  | <b>T1PKS</b>                    |                                                                                       | butyrolactols ( <b>2a-2g</b> )                |
| Region 2.7         | hgIE-KS                         |                                                                                       |                                               |
| Region 2.8         | terpene, NRPS                   |                                                                                       |                                               |
| Region 2.9         | blactam                         |                                                                                       |                                               |
| Region 2.10        | terpene                         |                                                                                       |                                               |
| Region 2.11        | butyrolactone                   |                                                                                       |                                               |
| Region 2.12        | NRPS                            |                                                                                       |                                               |
| Region 2.13        | NI-siderophore                  |                                                                                       |                                               |
| Region 2.14        | NAPAA                           |                                                                                       |                                               |
| <b>Region 2.15</b> | <b>T1PKS</b>                    |                                                                                       | cattleyatetronates ( <b>3a-3b</b> )           |
| Region 2.16        | T1PKS                           |                                                                                       |                                               |

**Notes:** L-681.217 and demethyl L-681.217 were renamed as cattlemycins A and B, respectively.

**Supplementary Table 3.** Proposed biosynthetic gene cluster of cattlemycins from *S. cattleya* NRRL 8057 (region 1.15).

| <b>Name</b>    | <b>Accession ID</b> | <b>Size (aa)</b> | <b>Proposed Function</b>                                         | <b>Homologs (identity/positive)</b> | <b>Source Strain</b>                     |
|----------------|---------------------|------------------|------------------------------------------------------------------|-------------------------------------|------------------------------------------|
| <b>CamF</b>    | WP_014144293.1      | 387              | methionine adenosyltransferase                                   | WP_200428941.1<br>(77%/85%)         | <i>Streptomyces</i><br>sp. NE5-10        |
| <b>LcaD</b>    | WP_173405727.1      | 243              | alpha/beta fold hydrolase                                        | WP_014144294.1<br>(99%/100%)        | <i>Streptomyces</i><br>sp. SID5468       |
| <b>LcaRx</b>   | WP_265736688.1      | 917              | LuxR family transcriptional regulator                            | WP_236572710.1<br>(58%/70%)         | <i>Streptomyces</i><br>sp. GS7           |
| <b>LcaP</b>    | WP_014144296.1      | 259              | 4'-phosphopantetheinyl transferase superfamily protein           | WP_202447497.1<br>(99%/100%)        | <i>Streptomyces</i><br>sp. SID5468       |
| <b>LcaAI</b>   | WP_014144297.1      | 2070             | beta-ketoacyl synthase N-terminal-like domain-containing protein | WP_159503160.1<br>(64%/71%)         | <i>Streptomyces</i><br>sp. GS7           |
| <b>LcaAII</b>  | WP_014144298.1      | 4608             | SDR family NAD(P)-dependent oxidoreductase                       | WP_202446693.1<br>(99%/100%)        | <i>Streptomyces</i><br>sp. SID5468       |
| <b>LcaAIII</b> | WP_014144299.1      | 1586             | non-ribosomal peptide synthetase                                 | WP_066930895.1<br>(74%/80%)         | <i>Streptomyces</i><br>sp. NBRC 110611   |
| <b>LcaAIV</b>  | WP_014144300.1      | 6721             | SDR family NAD(P)-dependent oxidoreductase                       | WP_159503163.1<br>(67%/73%)         | <i>Streptomyces</i><br>sp. GS7           |
| <b>LcaAV</b>   | WP_014144301.1      | 2501             | SDR family NAD(P)-dependent oxidoreductase                       | WP_106433187.1<br>(100%/100%)       | <i>Streptomyces</i><br>sp. SID5468       |
| <b>LcaAVI</b>  | WP_014144302.1      | 2518             | type I polyketide synthase                                       | WP_159503164.1<br>(55%/61%)         | <i>Streptomyces</i><br>sp. GS7           |
| <b>LcaE</b>    | WP_014144303.1      | 469              | amidase                                                          | WP_066930887.1<br>(81%/86%)         | <i>Streptomyces</i><br>sp. NBRC 110611   |
| <b>LcaOII</b>  | WP_014144304.1      | 407              | cytochrome P450                                                  | WP_202447498.1<br>(99%/100%)        | <i>Streptomyces</i><br>sp. SID5468       |
| <b>LcaCI</b>   | WP_014144305.1      | 1087             | malonyl CoA-acyl carrier protein transacylase                    | WP_066930879.1<br>(73%/80%)         | <i>Streptomyces</i><br>sp. NBRC 110611   |
| <b>LcaM</b>    | WP_014144306.1      | 322              | class I SAM-dependent methyltransferase                          | WP_066930877.1<br>(69%/79%)         | <i>Streptomyces</i><br>sp. NBRC 110611   |
| <b>LcaCII</b>  | WP_202447499.1      | 653              | acyltransferase domain-containing protein                        | WP_066930875.1<br>(68%/75%)         | <i>Streptomyces</i><br>sp. NBRC 110611   |
| <b>LcaOI</b>   | WP_014144309.1      | 404              | cytochrome P450                                                  | WP_066930873.1<br>(78%/86%)         | <i>Streptomyces</i><br>sp. NBRC 110611   |
| <b>LcaRI</b>   | WP_231905110.1      | 222              | TetR/AcrR family transcriptional regulator                       | WP_237694977.1<br>(99%/100%)        | <i>Streptomyces</i><br>sp. SID5468       |
| <b>LcaT</b>    | WP_014144311.1      | 536              | MDR family MFS transporter                                       | WP_173158266.1<br>(62%/75%)         | <i>Phytohabitans</i><br><i>suffuscus</i> |

**Supplementary Table 4.** Proposed biosynthetic gene cluster of butyrolactols from *S. cattleya* NRRL 8057 (region 2.6).

| Name         | Accession ID   | Size (aa) | Proposed Function                                 | Homologs (identity/positive) | Source Strain                          |
|--------------|----------------|-----------|---------------------------------------------------|------------------------------|----------------------------------------|
| <b>ButQ</b>  | WP_014150750.1 | 147       | hypothetical protein                              | WP_181856666.1<br>(75%/85%)  | <i>Streptomyces reniochalinae</i>      |
| <b>ButP</b>  | WP_014627076.1 | 75        | biotin/lipoyl-binding carrier protein             | WP_187828509.1<br>(82%/90%)  | <i>Streptomyces</i> sp.<br>TRM68367    |
| <b>ButA</b>  | WP_014150752.1 | 5935      | type I polyketide synthase                        | WP_245962286.1<br>(77%/82%)  | <i>Streptomyces ardesiacus</i>         |
| <b>ButO</b>  | WP_014150753.1 | 473       | propionyl-CoA carboxylase subunit beta            | WP_267715829.1<br>(85%/89%)  | <i>Streptomyces</i> sp.<br>CoH17       |
| <b>ButN</b>  | WP_014150755.1 | 239       | class I SAM-dependent methyltransferase           | WP_164368603.1<br>(65%/74%)  | <i>Streptomyces diastaticus</i>        |
| <b>ButM</b>  | WP_014150756.1 | 622       | class I SAM-dependent methyltransferase           | WP_108933445.1<br>(82%/87%)  | <i>Streptomyces ardesiacus</i>         |
| <b>ButT3</b> | WP_014150757.1 | 308       | ABC transporter ATP-binding protein               | WP_079080699.1<br>(82%/89%)  | <i>Streptomyces</i> sp.<br>NBRC 110030 |
| <b>ButT2</b> | WP_014150758.1 | 253       | ABC transporter permease                          | WP_267715814.1<br>(77%/83%)  | <i>Streptomyces</i> sp.<br>CoH17       |
| <b>ButL</b>  | WP_014150759.1 | 414       | hypothetical protein                              | WP_055469556.1<br>(79%/84%)  | <i>Streptomyces</i> sp.<br>NBRC 110030 |
| <b>ButT1</b> | WP_014150760.1 | 442       | MFS transporter                                   | NEB62850.1<br>(77%/84%)      | <i>Streptomyces diastaticus</i>        |
| <b>ButG</b>  | WP_014150761.1 | 254       | alpha/beta fold hydrolase                         | WP_164368023.1<br>(77%/82%)  | <i>Streptomyces diastaticus</i>        |
| <b>ButK</b>  | WP_014150762.1 | 356       | HAD-IIIC family phosphatase                       | WP_055469554.1<br>(86%/91%)  | <i>Streptomyces</i> sp.<br>NBRC 110030 |
| <b>ButJ</b>  | WP_014150763.1 | 381       | acyl-CoA dehydrogenase family protein             | WP_203714514.1<br>(80%/87%)  | <i>Streptomyces diastaticus</i>        |
| <b>ButI</b>  | WP_014150764.1 | 85        | acyl carrier protein                              | WP_053638656.1<br>(82%/90%)  | <i>Streptomyces</i> sp.<br>NRRL F-4707 |
| <b>ButH</b>  | WP_014150765.1 | 302       | 3-hydroxybutyryl-CoA dehydrogenase                | KOT98808.1<br>(88%/91%)      | <i>Streptomyces</i> sp.<br>NRRL F-4711 |
| <b>ButF</b>  | WP_014150766.1 | 1154      | SDR family NAD(P)-dependent oxidoreductase        | WP_108933441.1<br>(82%/86%)  | <i>Streptomyces ardesiacus</i>         |
| <b>ButE</b>  | WP_014150767.1 | 3085      | type I polyketide synthase                        | WP_053664160.1<br>(81%/85%)  | <i>Streptomyces</i> sp.<br>NRRL F-7442 |
| <b>ButD</b>  | WP_014150768.1 | 3413      | type I polyketide synthase                        | WP_108933439.1<br>(81%/86%)  | <i>Streptomyces ardesiacus</i>         |
| <b>ButC</b>  | WP_014150769.1 | 3301      | type I polyketide synthase                        | WP_055469548.1<br>(72%/79%)  | <i>Streptomyces</i> sp.<br>NBRC 110030 |
| <b>ButB</b>  | WP_014627073.1 | 2053      | type I polyketide synthase                        | WP_234353271.1<br>(71%/80%)  | <i>Streptomyces</i> sp.<br>NBRC 110030 |
| <b>ButR</b>  | WP_014150771.1 | 667       | LuxR C-terminal-related transcriptional regulator | WP_108934774.1<br>(75%/81%)  | <i>Streptomyces ardesiacus</i>         |

**Supplementary Table 5.** Proposed biosynthetic gene cluster of cattleyatetronates from *S. cattleya* NRRL 8057 (region 2.15).

| Name         | Accession ID   | Size (aa) | Proposed Function                                                         | Homologs (identity/positive) | Source Strain                          |
|--------------|----------------|-----------|---------------------------------------------------------------------------|------------------------------|----------------------------------------|
| <b>CttT</b>  | WP_014151912.1 | 260       | phytanoyl-CoA dioxygenase family protein                                  | WP_267010547.1 (83%/90%)     | <i>Streptomyces</i> sp. NBC_00249      |
| <b>CttQ</b>  | WP_014151913.1 | 631       | SDR family oxidoreductase                                                 | WP_235446340.1 (65%/74%)     | <i>Streptomyces</i> <i>sioyaensis</i>  |
| <b>CttP</b>  | WP_014626738.1 | 420       | nucleotide sugar dehydrogenase                                            | WP_267010544.1 (89%/92%)     | <i>Streptomyces</i> sp. NBC_00249      |
| <b>CttT3</b> | WP_014151915.1 | 461       | MFS transporter                                                           | WP_285569156.1 (63%/72%)     | <i>Streptomyces</i> sp. RTGN2          |
| <b>CttO</b>  | WP_014151916.1 | 499       | FAD-dependent monooxygenase                                               | WP_281066940.1 (74%/82%)     | <i>Streptomyces</i> <i>inhibens</i>    |
| <b>CttR2</b> | WP_041823735.1 | 195       | PadR family transcriptional regulator                                     | WP_280720087.1 (78%/87%)     | <i>Kitasatospora</i> sp. MAP5-34       |
| <b>CttN</b>  | WP_014151919.1 | 365       | NAD(P)-dependent alcohol dehydrogenase                                    | WP_205369216.1 (74%/84%)     | <i>Streptomyces</i> <i>noursei</i>     |
| <b>CttL</b>  | WP_014151920.1 | 402       | cytochrome P450                                                           | WP_205369215.1 (81%/88%)     | <i>Streptomyces</i> <i>noursei</i>     |
| <b>CttK</b>  | WP_014151921.1 | 65        | ferredoxin                                                                | WP_205369214.1 (76%/87%)     | <i>Streptomyces</i> <i>noursei</i>     |
| <b>CttA</b>  | WP_014151922.1 | 4492      | type I polyketide synthase                                                | WP_225930501.1 (54%/63%)     | <i>Streptomyces</i> <i>koyangensis</i> |
| <b>CttE</b>  | WP_014151923.1 | 350       | 3-oxoacyl-ACP synthase III family protein                                 | WP_205371423.1 (82%/88%)     | <i>Streptomyces</i> <i>noursei</i>     |
| <b>CttF</b>  | WP_014151924.1 | 87        | acyl carrier protein                                                      | WP_205369212.1 (56%/75%)     | <i>Streptomyces</i> <i>noursei</i>     |
| <b>CttG</b>  | WP_014151925.1 | 317       | thiamine pyrophosphate-dependent dehydrogenase E1 component subunit alpha | WP_240167907.1 (78%/84%)     | <i>Streptomyces</i> <i>noursei</i>     |
| <b>CttH</b>  | WP_014151926.1 | 333       | pyruvate dehydrogenase                                                    | WP_205369211.1 (80%/87%)     | <i>Streptomyces</i> <i>noursei</i>     |
| <b>CttI</b>  | WP_014151927.1 | 368       | 2-oxo acid dehydrogenase subunit E2                                       | WP_205369210.1 (70%/81%)     | <i>Streptomyces</i> <i>noursei</i>     |
| <b>CttJ</b>  | WP_014151928.1 | 477       | aldehyde dehydrogenase                                                    | WP_205369209.1 (76%/84%)     | <i>Streptomyces</i> <i>noursei</i>     |
| <b>CttM</b>  | WP_014151929.1 | 281       | class I SAM-dependent methyltransferase                                   | WP_205369208.1 (85%/90%)     | <i>Streptomyces</i> <i>noursei</i>     |
| <b>CttB</b>  | Unnamed        | 388       | type I polyketide synthase                                                |                              |                                        |
| <b>CttC</b>  | WP_014626734.1 | 3166      | type I polyketide synthase                                                | WP_205369207.1 (64%/72%)     | <i>Streptomyces</i> <i>noursei</i>     |
| <b>CttD</b>  | WP_231904995.1 | 1057      | type I polyketide synthase                                                | WP_205369206.1 (74%/82%)     | <i>Streptomyces</i> <i>noursei</i>     |
| <b>CttT1</b> | WP_014151932.1 | 438       | MFS transporter                                                           | QRX96529.1 (78%/84%)         | <i>Streptomyces</i> <i>noursei</i>     |
| <b>CttT2</b> | WP_014151933.1 | 399       | MFS transporter                                                           | WP_205369204.1 (81%/87%)     | <i>Streptomyces</i> <i>noursei</i>     |
| <b>CttR1</b> | WP_014151934.1 | 957       | LuxR family transcriptional regulator                                     | WP_205369203.1 (67%/77%)     | <i>Streptomyces</i> <i>noursei</i>     |



**Supplementary Table 6.** Summary of polyketides characterized in *S. cattleya* NRRL 8057 in this work.

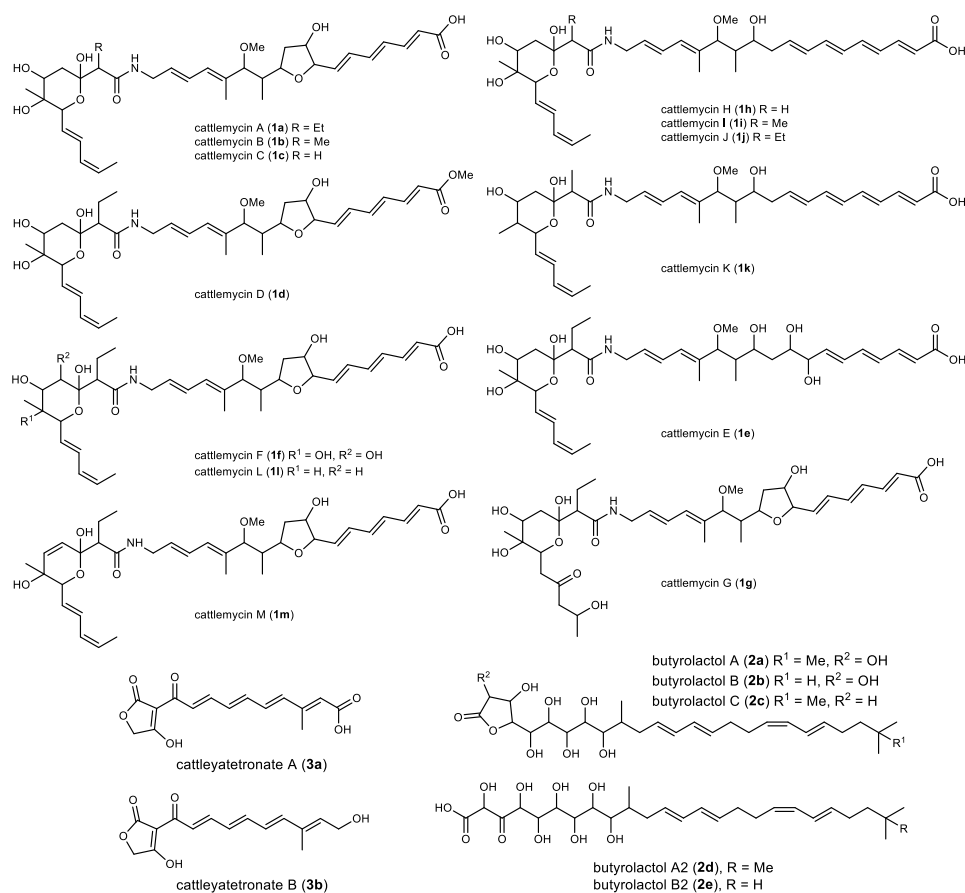

| BGC  | Compounds                           | Formula                                          | RT<br>/min | Media |     |      | Characterization |
|------|-------------------------------------|--------------------------------------------------|------------|-------|-----|------|------------------|
|      |                                     |                                                  |            | MSF   | A3M | ISP2 |                  |
| 2.15 | cattleyatetronate A ( <b>3a</b> )   | C <sub>15</sub> H <sub>14</sub> O <sub>6</sub>   | 3.37       |       | +   |      | MS/MS, NMR       |
| 2.15 | cattleyatetronate B ( <b>3b</b> )   | C <sub>15</sub> H <sub>16</sub> O <sub>5</sub>   | 3.62       |       | +   |      | MS/MS            |
| 1.15 | cattlemycin G ( <b>1g</b> )         | C <sub>36</sub> H <sub>55</sub> NO <sub>12</sub> | 4.13       |       |     | +    | MS/MS            |
| 1.15 | cattlemycin E ( <b>1e</b> )         | C <sub>36</sub> H <sub>55</sub> NO <sub>11</sub> | 4.49       |       | +   | +    | MS/MS            |
| 1.15 | cattlemycin F ( <b>1f</b> )         | C <sub>36</sub> H <sub>53</sub> NO <sub>11</sub> | 4.64       |       |     | +    | MS/MS            |
| 1.15 | cattlemycin C ( <b>1c</b> )         | C <sub>34</sub> H <sub>49</sub> NO <sub>10</sub> | 4.77       | +     | +   | +    | MS/MS            |
| 1.15 | cattlemycin B ( <b>1b</b> )         | C <sub>35</sub> H <sub>51</sub> NO <sub>10</sub> | 5.08       |       | +   | +    | MS/MS, known     |
| 1.15 | cattlemycin A ( <b>1a</b> )         | C <sub>36</sub> H <sub>53</sub> NO <sub>10</sub> | 5.31       | +     | +   | +    | MS/MS, NMR       |
| 1.15 | cattlemycin I ( <b>1i</b> )         | C <sub>35</sub> H <sub>51</sub> NO <sub>9</sub>  | 5.36       |       | +   |      | MS/MS            |
| 1.15 | cattlemycin H ( <b>1h</b> )         | C <sub>34</sub> H <sub>49</sub> NO <sub>9</sub>  | 5.51       |       | +   |      | MS/MS            |
| 1.15 | cattlemycin K ( <b>1k</b> )         | C <sub>35</sub> H <sub>51</sub> NO <sub>8</sub>  | 5.91       |       | +   |      | MS/MS            |
| 1.15 | cattlemycin L ( <b>1l</b> )         | C <sub>36</sub> H <sub>53</sub> NO <sub>9</sub>  | 5.91       |       | +   |      | MS/MS            |
| 1.15 | cattlemycin J ( <b>1j</b> )         | C <sub>36</sub> H <sub>53</sub> NO <sub>9</sub>  | 6.02       |       | +   |      | MS/MS            |
| 1.15 | cattlemycin M ( <b>1m</b> )         | C <sub>36</sub> H <sub>51</sub> NO <sub>9</sub>  | 6.05       |       | +   |      | MS/MS            |
| 1.15 | cattlemycin D ( <b>1d</b> )         | C <sub>37</sub> H <sub>55</sub> NO <sub>10</sub> | 6.13       | +     |     |      | MS/MS, NMR       |
| 2.6  | butyrolactol B2 ( <b>2d</b> )       | C <sub>27</sub> H <sub>44</sub> O <sub>10</sub>  | 7.12       | +     |     |      | MS/MS            |
| 2.6  | butyrolactol B isomer ( <b>2g</b> ) | C <sub>27</sub> H <sub>44</sub> O <sub>9</sub>   | 7.36       | +     |     |      | MS/MS            |
| 2.6  | butyrolactol A2 ( <b>2c</b> )       | C <sub>28</sub> H <sub>46</sub> O <sub>10</sub>  | 7.46       | +     |     |      | MS/MS            |
| 2.6  | butyrolactol B ( <b>2b</b> )        | C <sub>27</sub> H <sub>44</sub> O <sub>9</sub>   | 7.49       | +     |     |      | MS/MS, NMR       |
| 2.6  | butyrolactol A isomer ( <b>2f</b> ) | C <sub>28</sub> H <sub>46</sub> O <sub>9</sub>   | 7.69       | +     |     |      | MS/MS            |
| 2.6  | butyrolactol A ( <b>2a</b> )        | C <sub>28</sub> H <sub>46</sub> O <sub>9</sub>   | 7.83       | +     |     |      | MS/MS, NMR       |
| 2.6  | butyrolactol C ( <b>2e</b> )        | C <sub>28</sub> H <sub>46</sub> O <sub>8</sub>   | 7.99       | +     |     |      | MS/MS            |

**Supplementary Table 7a.** Annotation of candidate ions screened by NegMDF window for cattlemycins.

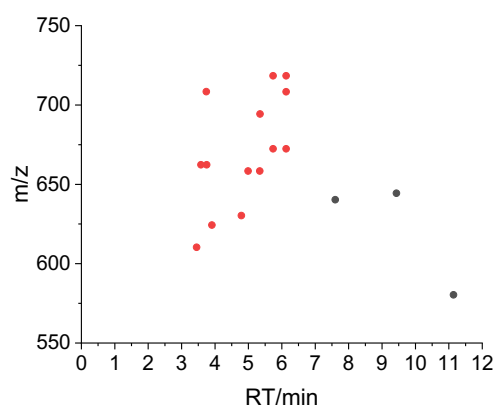

| Medium | RT/min | Obs <i>m/z</i> | Compounds                   | Formula                                          | Ion type              | Calc <i>m/z</i> |
|--------|--------|----------------|-----------------------------|--------------------------------------------------|-----------------------|-----------------|
| MSF    | 3.45   | 610.2904       | cattlemycin analogue        | C <sub>30</sub> H <sub>45</sub> NO <sub>12</sub> | [M-H] <sup>-</sup>    | 610.2928        |
| MSF    | 3.58   | 662.2960       | cattlemycin analogue        | C <sub>37</sub> H <sub>45</sub> NO <sub>10</sub> | [M-H] <sup>-</sup>    | 662.2971        |
| MSF    | 3.75   | 662.2959       | cattlemycin analogue        | C <sub>37</sub> H <sub>45</sub> NO <sub>10</sub> | [M-H] <sup>-</sup>    | 662.2971        |
| MSF    | 3.75   | 708.4092       |                             |                                                  | [H+Cl] <sup>-</sup>   | 708.4095        |
| MSF    | 3.91   | 624.3061       | cattlemycin analogue        | C <sub>31</sub> H <sub>47</sub> NO <sub>12</sub> | [M-H] <sup>-</sup>    | 624.3084        |
| MSF    | 4.79   | 630.3271       | cattlemycin C ( <b>1c</b> ) | C <sub>34</sub> H <sub>49</sub> NO <sub>10</sub> | [M-H] <sup>-</sup>    | 630.3284        |
| MSF    | 4.99   | 658.3583       | cattlemycin analogue        | C <sub>36</sub> H <sub>53</sub> NO <sub>10</sub> | [M-H] <sup>-</sup>    | 658.3570        |
| MSF    | 5.34   | 658.3584       | cattlemycin A ( <b>1a</b> ) | C <sub>36</sub> H <sub>53</sub> NO <sub>10</sub> | [M-H] <sup>-</sup>    | 658.3570        |
| MSF    | 5.35   | 694.3349       |                             |                                                  | [H+Cl] <sup>-</sup>   | 694.3363        |
| MSF    | 5.74   | 672.3737       | cattlemycin analogue        | C <sub>37</sub> H <sub>55</sub> NO <sub>10</sub> | [M-H] <sup>-</sup>    | 672.3753        |
| MSF    | 5.74   | 718.3792       |                             |                                                  | [M+HCOO] <sup>-</sup> | 718.3808        |
| MSF    | 6.13   | 672.3738       | cattlemycin D ( <b>1d</b> ) | C <sub>37</sub> H <sub>55</sub> NO <sub>10</sub> | [M-H] <sup>-</sup>    | 672.3753        |
| MSF    | 6.13   | 708.3508       |                             |                                                  | [H+Cl] <sup>-</sup>   | 708.3520        |
| MSF    | 6.13   | 718.3793       |                             |                                                  | [M+HCOO] <sup>-</sup> | 718.3808        |
| MSF    | 7.60   | 640.2821       | x                           |                                                  |                       |                 |
| MSF    | 9.43   | 644.3972       | x                           |                                                  |                       |                 |
| MSF    | 11.14  | 580.3380       | x                           |                                                  |                       |                 |

**Notes:** 17 candidate ions were obtained from the MSF culture. According to the MS/MS checking, 14 ions from 9 cattlemycin analogues were marked in color, including cattlemycins A, C and D.

**Supplementary Table 7b.** Annotation of candidate ions screened by NegMDF window for cattlemycins.

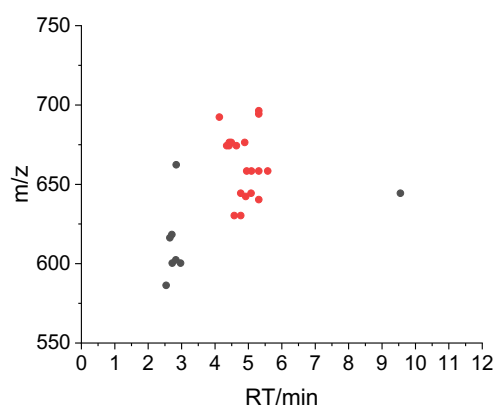

| Medium | RT/min | Obs <i>m/z</i> | Compounds                   | Formula                                          | Ion type                            | Calc <i>m/z</i> |
|--------|--------|----------------|-----------------------------|--------------------------------------------------|-------------------------------------|-----------------|
| ISP2   | 2.54   | 586.3091       | x                           |                                                  |                                     |                 |
| ISP2   | 2.65   | 616.3195       | x                           |                                                  |                                     |                 |
| ISP2   | 2.71   | 618.3347       | x                           |                                                  |                                     |                 |
| ISP2   | 2.72   | 600.3247       | x                           |                                                  |                                     |                 |
| ISP2   | 2.83   | 602.3486       | x                           |                                                  |                                     |                 |
| ISP2   | 2.84   | 662.3362       | x                           |                                                  |                                     |                 |
| ISP2   | 2.97   | 600.3251       | x                           |                                                  |                                     |                 |
| ISP2   | 4.13   | 692.3651       | cattlemycin G ( <b>1g</b> ) | C <sub>36</sub> H <sub>55</sub> NO <sub>12</sub> | [M-H] <sup>-</sup>                  | 692.3651        |
| ISP2   | 4.35   | 674.3541       | cattlemycin analogue        | C <sub>36</sub> H <sub>53</sub> NO <sub>11</sub> | [M-H] <sup>-</sup>                  | 674.3546        |
| ISP2   | 4.42   | 674.3544       | cattlemycin analogue        | C <sub>36</sub> H <sub>53</sub> NO <sub>11</sub> | [M-H] <sup>-</sup>                  | 674.3546        |
| ISP2   | 4.43   | 676.3683       | cattlemycin analogue        | C <sub>36</sub> H <sub>55</sub> NO <sub>11</sub> | [M-H] <sup>-</sup>                  | 676.3702        |
| ISP2   | 4.49   | 676.3698       | cattlemycin E ( <b>1e</b> ) | C <sub>36</sub> H <sub>55</sub> NO <sub>11</sub> | [M-H] <sup>-</sup>                  | 676.3702        |
| ISP2   | 4.58   | 630.3283       | cattlemycin analogue        | C <sub>34</sub> H <sub>49</sub> NO <sub>10</sub> | [M-H] <sup>-</sup>                  | 630.3284        |
| ISP2   | 4.64   | 674.3543       | cattlemycin F ( <b>1f</b> ) | C <sub>36</sub> H <sub>53</sub> NO <sub>11</sub> | [M-H] <sup>-</sup>                  | 674.3546        |
| ISP2   | 4.77   | 630.3280       | cattlemycin C ( <b>1c</b> ) | C <sub>34</sub> H <sub>49</sub> NO <sub>10</sub> | [M-H] <sup>-</sup>                  | 630.3284        |
| ISP2   | 4.77   | 644.3437       | cattlemycin analogue        | C <sub>35</sub> H <sub>51</sub> NO <sub>10</sub> | [M-H] <sup>-</sup>                  | 644.3440        |
| ISP2   | 4.89   | 676.3699       | cattlemycin analogue        | C <sub>36</sub> H <sub>55</sub> NO <sub>11</sub> | [M-H] <sup>-</sup>                  | 676.3702        |
| ISP2   | 4.92   | 642.3279       | cattlemycin analogue        | C <sub>35</sub> H <sub>49</sub> NO <sub>10</sub> | [M-H] <sup>-</sup>                  | 642.3284        |
| ISP2   | 4.95   | 658.3594       | cattlemycin analogue        | C <sub>36</sub> H <sub>53</sub> NO <sub>10</sub> | [M-H] <sup>-</sup>                  | 658.3570        |
| ISP2   | 5.08   | 644.3441       | cattlemycin B ( <b>1b</b> ) | C <sub>35</sub> H <sub>51</sub> NO <sub>10</sub> | [M-H] <sup>-</sup>                  | 644.3440        |
| ISP2   | 5.09   | 658.3597       | cattlemycin analogue        | C <sub>36</sub> H <sub>53</sub> NO <sub>10</sub> | [M-H] <sup>-</sup>                  | 658.3570        |
| ISP2   | 5.31   | 658.3599       | cattlemycin A ( <b>1a</b> ) | C <sub>36</sub> H <sub>53</sub> NO <sub>10</sub> | [M-H] <sup>-</sup>                  | 658.3570        |
| ISP2   | 5.31   | 694.3360       |                             |                                                  | [H+Cl] <sup>-</sup>                 | 694.3363        |
| ISP2   | 5.31   | 696.3349       |                             |                                                  | [M+ <sup>37</sup> Cl] <sup>-</sup>  | 696.3333        |
| ISP2   | 5.31   | 640.3487       |                             |                                                  | [M-H <sub>2</sub> O-H] <sup>-</sup> | 640.3491        |
| ISP2   | 5.58   | 658.3593       | cattlemycin analogue        | C <sub>36</sub> H <sub>53</sub> NO <sub>10</sub> | [M-H] <sup>-</sup>                  | 658.3570        |
| ISP2   | 9.55   | 644.4012       | x                           |                                                  |                                     |                 |

**Notes:** 27 candidate ions were obtained from the ISP2 culture. According to the MS/MS checking, 19 ions from 16 cattlemycin analogues were marked in color, including cattlemycins A, B, C, E, F and G.

**Supplementary Table 7c.** Annotation of candidate ions screened by NegMDF window for cattlemycins.

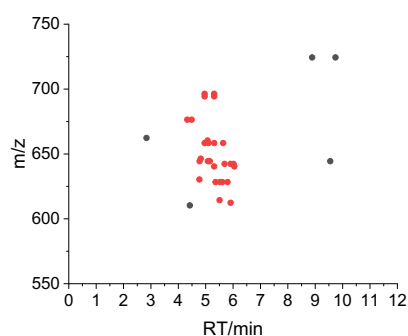

| Medium | RT/min | Obs m/z  | Compounds                   | Formula                                          | Ion type                            | Calc m/z |
|--------|--------|----------|-----------------------------|--------------------------------------------------|-------------------------------------|----------|
| A3M    | 2.84   | 662.3362 | x                           |                                                  |                                     |          |
| A3M    | 4.33   | 676.3704 | cattlemycin analogue        | C <sub>36</sub> H <sub>55</sub> NO <sub>11</sub> | [M-H] <sup>-</sup>                  | 676.3702 |
| A3M    | 4.42   | 610.3278 | x                           |                                                  |                                     |          |
| A3M    | 4.49   | 676.3703 | cattlemycin E ( <b>1e</b> ) | C <sub>36</sub> H <sub>55</sub> NO <sub>11</sub> | [M-H] <sup>-</sup>                  | 676.3702 |
| A3M    | 4.77   | 630.3284 | cattlemycin C ( <b>1c</b> ) | C <sub>34</sub> H <sub>49</sub> NO <sub>10</sub> | [M-H] <sup>-</sup>                  | 630.3284 |
| A3M    | 4.78   | 644.3440 | cattlemycin analogue        | C <sub>35</sub> H <sub>51</sub> NO <sub>10</sub> | [M-H] <sup>-</sup>                  | 644.3440 |
| A3M    | 4.82   | 646.3564 | cattlemycin analogue        | C <sub>35</sub> H <sub>53</sub> NO <sub>10</sub> | [M-H] <sup>-</sup>                  | 646.3597 |
| A3M    | 4.96   | 658.3597 | cattlemycin analogue        | C <sub>36</sub> H <sub>53</sub> NO <sub>10</sub> | [M-H] <sup>-</sup>                  | 658.3570 |
| A3M    | 4.96   | 694.3362 |                             |                                                  | [H+Cl] <sup>-</sup>                 | 694.3363 |
| A3M    | 4.96   | 696.3349 |                             |                                                  | [M+ <sup>37</sup> Cl] <sup>-</sup>  | 696.3333 |
| A3M    | 5.07   | 660.3719 | cattlemycin analogue        | C <sub>36</sub> H <sub>55</sub> NO <sub>10</sub> | [M-H] <sup>-</sup>                  | 660.3753 |
| A3M    | 5.08   | 644.3441 | cattlemycin B ( <b>1b</b> ) | C <sub>35</sub> H <sub>51</sub> NO <sub>10</sub> | [M-H] <sup>-</sup>                  | 644.3440 |
| A3M    | 5.10   | 658.3596 | cattlemycin analogue        | C <sub>36</sub> H <sub>53</sub> NO <sub>10</sub> | [M-H] <sup>-</sup>                  | 658.3570 |
| A3M    | 5.15   | 644.3438 | cattlemycin analogue        | C <sub>35</sub> H <sub>51</sub> NO <sub>10</sub> | [M-H] <sup>-</sup>                  | 644.3440 |
| A3M    | 5.31   | 658.3603 | cattlemycin A ( <b>1a</b> ) | C <sub>36</sub> H <sub>53</sub> NO <sub>10</sub> | [M-H] <sup>-</sup>                  | 658.3570 |
| A3M    | 5.31   | 694.3363 |                             |                                                  | [H+Cl] <sup>-</sup>                 | 694.3363 |
| A3M    | 5.31   | 696.3353 |                             |                                                  | [M+ <sup>37</sup> Cl] <sup>-</sup>  | 696.3333 |
| A3M    | 5.31   | 640.3488 |                             |                                                  | [M-H <sub>2</sub> O-H] <sup>-</sup> | 640.3491 |
| A3M    | 5.36   | 628.3490 | cattlemycin I ( <b>1i</b> ) | C <sub>35</sub> H <sub>51</sub> NO <sub>9</sub>  | [M-H] <sup>-</sup>                  | 628.3491 |
| A3M    | 5.51   | 614.3335 | cattlemycin H ( <b>1h</b> ) | C <sub>34</sub> H <sub>49</sub> NO <sub>9</sub>  | [M-H] <sup>-</sup>                  | 614.3335 |
| A3M    | 5.52   | 628.3489 | cattlemycin analogue        | C <sub>35</sub> H <sub>51</sub> NO <sub>9</sub>  | [M-H] <sup>-</sup>                  | 628.3491 |
| A3M    | 5.61   | 628.3490 | cattlemycin analogue        | C <sub>35</sub> H <sub>51</sub> NO <sub>9</sub>  | [M-H] <sup>-</sup>                  | 628.3491 |
| A3M    | 5.64   | 658.3598 | cattlemycin analogue        | C <sub>36</sub> H <sub>53</sub> NO <sub>10</sub> | [M-H] <sup>-</sup>                  | 658.3570 |
| A3M    | 5.69   | 642.3646 | cattlemycin analogue        | C <sub>36</sub> H <sub>53</sub> NO <sub>9</sub>  | [M-H] <sup>-</sup>                  | 642.3648 |
| A3M    | 5.80   | 628.3487 | cattlemycin analogue        | C <sub>35</sub> H <sub>51</sub> NO <sub>9</sub>  | [M-H] <sup>-</sup>                  | 628.3491 |
| A3M    | 5.91   | 612.3543 | cattlemycin K ( <b>1k</b> ) | C <sub>35</sub> H <sub>51</sub> NO <sub>8</sub>  | [M-H] <sup>-</sup>                  | 612.3542 |
| A3M    | 5.91   | 642.3648 | cattlemycin L ( <b>1l</b> ) | C <sub>36</sub> H <sub>53</sub> NO <sub>9</sub>  | [M-H] <sup>-</sup>                  | 642.3648 |
| A3M    | 6.02   | 642.3654 | cattlemycin J ( <b>1j</b> ) | C <sub>36</sub> H <sub>53</sub> NO <sub>9</sub>  | [M-H] <sup>-</sup>                  | 642.3648 |
| A3M    | 6.05   | 640.3493 | cattlemycin M ( <b>1m</b> ) | C <sub>36</sub> H <sub>51</sub> NO <sub>9</sub>  | [M-H] <sup>-</sup>                  | 640.3491 |
| A3M    | 8.89   | 724.3479 | x                           |                                                  |                                     |          |
| A3M    | 9.55   | 644.3999 | x                           |                                                  |                                     |          |
| A3M    | 9.74   | 724.3488 | x                           |                                                  |                                     |          |

**Notes:** 32 candidate ions were obtained from the A3M culture. According to the MS/MS checking, 27 ions from 22 cattlemycin analogues were marked in color, including cattlemycins A, B, C, E, and H-M.

**Supplementary Table 8a.** Annotation of candidate ions screened by NegMDF window for butyrolactols.

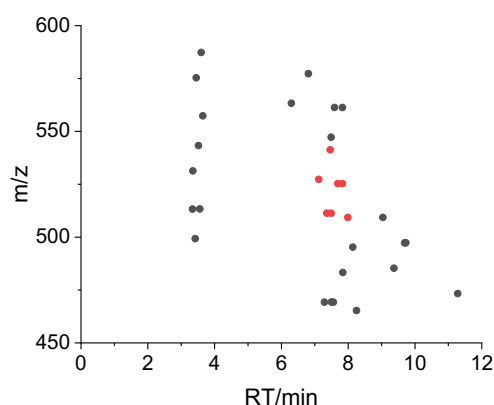

| Medium | RT/min | Obs m/z  | Compounds                           | Formula                                         | Ion type           | Calc m/z |
|--------|--------|----------|-------------------------------------|-------------------------------------------------|--------------------|----------|
| MSF    | 3.34   | 513.2540 | x                                   |                                                 |                    |          |
| MSF    | 3.35   | 531.3012 | x                                   |                                                 |                    |          |
| MSF    | 3.42   | 499.2749 | x                                   |                                                 |                    |          |
| MSF    | 3.45   | 575.3271 | x                                   |                                                 |                    |          |
| MSF    | 3.52   | 543.3010 | x                                   |                                                 |                    |          |
| MSF    | 3.56   | 513.2906 | x                                   |                                                 |                    |          |
| MSF    | 3.60   | 587.3274 | x                                   |                                                 |                    |          |
| MSF    | 3.65   | 557.3168 | x                                   |                                                 |                    |          |
| MSF    | 6.30   | 563.2841 | x                                   |                                                 |                    |          |
| MSF    | 6.81   | 577.2993 | x                                   |                                                 |                    |          |
| MSF    | 7.12   | 527.2852 | butyrolactol B2 ( <b>2d</b> )       | C <sub>27</sub> H <sub>44</sub> O <sub>10</sub> | [M-H] <sup>-</sup> | 527.2862 |
| MSF    | 7.29   | 469.2563 | x                                   |                                                 |                    |          |
| MSF    | 7.36   | 511.2903 | butyrolactol B isomer ( <b>2g</b> ) | C <sub>27</sub> H <sub>44</sub> O <sub>9</sub>  | [M-H] <sup>-</sup> | 511.2913 |
| MSF    | 7.46   | 541.3007 | butyrolactol A2 ( <b>2c</b> )       | C <sub>28</sub> H <sub>46</sub> O <sub>10</sub> | [M-H] <sup>-</sup> | 541.3018 |
| MSF    | 7.49   | 511.2902 | butyrolactol B ( <b>2b</b> )        | C <sub>27</sub> H <sub>44</sub> O <sub>9</sub>  | [M-H] <sup>-</sup> | 511.2913 |
| MSF    | 7.49   | 547.2669 | x                                   |                                                 |                    |          |
| MSF    | 7.50   | 469.2797 | x                                   |                                                 |                    |          |
| MSF    | 7.56   | 469.2564 | x                                   |                                                 |                    |          |
| MSF    | 7.59   | 561.3045 | x                                   |                                                 |                    |          |
| MSF    | 7.69   | 525.3058 | butyrolactol A isomer ( <b>2f</b> ) | C <sub>28</sub> H <sub>46</sub> O <sub>9</sub>  | [M-H] <sup>-</sup> | 525.3069 |
| MSF    | 7.83   | 525.3056 | butyrolactol A ( <b>2a</b> )        | C <sub>28</sub> H <sub>46</sub> O <sub>9</sub>  | [M-H] <sup>-</sup> | 525.3069 |
| MSF    | 7.83   | 561.2824 | x                                   |                                                 |                    |          |
| MSF    | 7.84   | 483.2952 | x                                   |                                                 |                    |          |
| MSF    | 7.99   | 509.3111 | butyrolactol C ( <b>2e</b> )        | C <sub>28</sub> H <sub>46</sub> O <sub>8</sub>  | [M-H] <sup>-</sup> | 509.3120 |
| MSF    | 8.14   | 495.2718 | x                                   |                                                 |                    |          |
| MSF    | 8.25   | 465.2849 | x                                   |                                                 |                    |          |
| MSF    | 9.04   | 509.2873 | x                                   |                                                 |                    |          |
| MSF    | 9.37   | 485.2816 | x                                   |                                                 |                    |          |
| MSF    | 9.69   | 497.2874 | x                                   |                                                 |                    |          |
| MSF    | 9.73   | 497.3223 | x                                   |                                                 |                    |          |
| MSF    | 11.28  | 473.2816 | x                                   |                                                 |                    |          |

**Notes:** 31 candidate ions were obtained from the MSF culture. According to the MS/MS checking, 7 butyrolactol ions were identified and marked in color.

**Supplementary Table 8b.** Annotation of candidate ions screened by NegMDF window for butyrolactols.

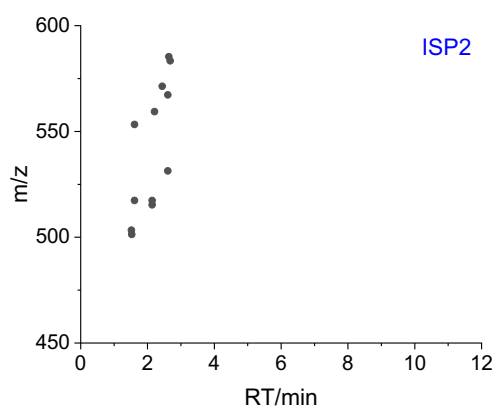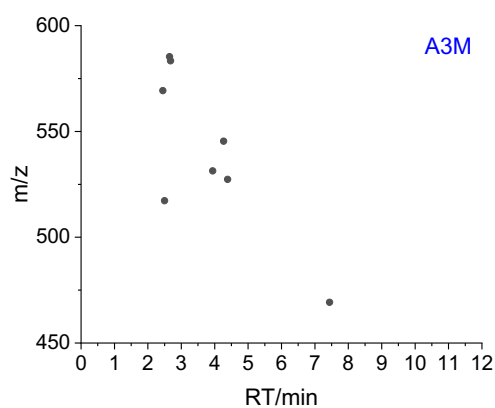

| Medium | RT/min | Obs <i>m/z</i> | Compounds | Formula | Ion type | Calc <i>m/z</i> |
|--------|--------|----------------|-----------|---------|----------|-----------------|
| ISP2   | 1.52   | 503.3194       | x         |         |          |                 |
| ISP2   | 1.53   | 501.3406       | x         |         |          |                 |
| ISP2   | 1.61   | 517.3352       | x         |         |          |                 |
| ISP2   | 1.61   | 553.3118       | x         |         |          |                 |
| ISP2   | 2.14   | 515.3198       | x         |         |          |                 |
| ISP2   | 2.14   | 517.3345       | x         |         |          |                 |
| ISP2   | 2.21   | 559.3457       | x         |         |          |                 |
| ISP2   | 2.44   | 571.3092       | x         |         |          |                 |
| ISP2   | 2.61   | 531.3144       | x         |         |          |                 |
| ISP2   | 2.61   | 567.2911       | x         |         |          |                 |
| ISP2   | 2.64   | 585.3254       | x         |         |          |                 |
| ISP2   | 2.68   | 583.3454       | x         |         |          |                 |
| A3M    | 2.45   | 569.2936       | x         |         |          |                 |
| A3M    | 2.50   | 517.2509       | x         |         |          |                 |
| A3M    | 2.65   | 585.3249       | x         |         |          |                 |
| A3M    | 2.68   | 583.3459       | x         |         |          |                 |
| A3M    | 3.94   | 531.3510       | x         |         |          |                 |
| A3M    | 4.27   | 545.3665       | x         |         |          |                 |
| A3M    | 4.39   | 527.3561       | x         |         |          |                 |
| A3M    | 7.44   | 469.2573       | x         |         |          |                 |

**Notes:** 12 and 8 candidate ions were obtained from the ISP2 and A3M cultures, respectively. None of them was identified as butyrolactols according to the MS/MS checking.

**Supplementary Table 9.** Annotation of candidate ions screened by NegMDF window for cattleyatetronates.

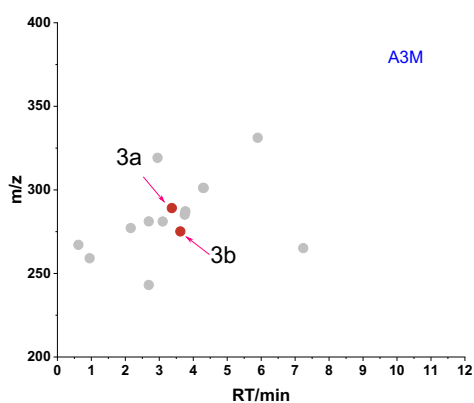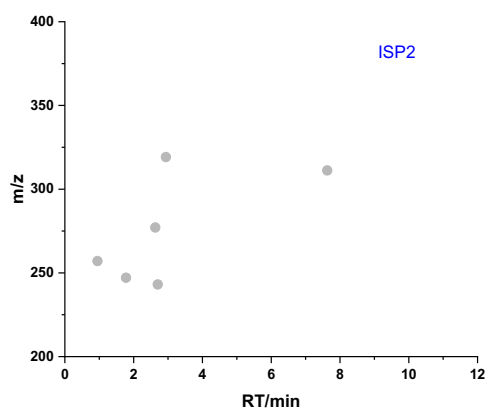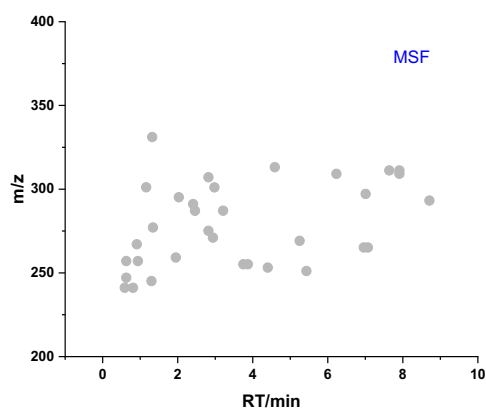

| Medium | RT/min | Obs m/z  | Compounds                         | Formula                                        | Ion type           | Calc m/z |
|--------|--------|----------|-----------------------------------|------------------------------------------------|--------------------|----------|
| A3M    | 0.62   | 267.0868 | x                                 |                                                |                    |          |
| A3M    | 0.95   | 259.0937 | x                                 |                                                |                    |          |
| A3M    | 2.16   | 277.1191 | x                                 |                                                |                    |          |
| A3M    | 2.69   | 281.1141 | x                                 |                                                |                    |          |
| A3M    | 2.69   | 243.0695 | x                                 |                                                |                    |          |
| A3M    | 2.95   | 319.1662 | x                                 |                                                |                    |          |
| A3M    | 3.10   | 281.0666 | x                                 |                                                |                    |          |
| A3M    | 3.37   | 289.0717 | cattleyatetronate A ( <b>3a</b> ) | C <sub>15</sub> H <sub>14</sub> O <sub>6</sub> | [M-H] <sup>-</sup> | 289.0718 |
| A3M    | 3.62   | 275.0923 | cattleyatetronate B ( <b>3b</b> ) | C <sub>15</sub> H <sub>16</sub> O <sub>5</sub> | [M-H] <sup>-</sup> | 275.0925 |
| A3M    | 3.75   | 285.1708 | x                                 |                                                |                    |          |
| A3M    | 3.77   | 287.1611 | x                                 |                                                |                    |          |
| A3M    | 4.29   | 301.1559 | x                                 |                                                |                    |          |
| A3M    | 4.31   | 301.1770 | x                                 |                                                |                    |          |
| A3M    | 5.90   | 331.1662 | x                                 |                                                |                    |          |
| A3M    | 7.24   | 265.1479 | x                                 |                                                |                    |          |
| ISP2   | 0.95   | 257.0779 | x                                 |                                                |                    |          |
| ISP2   | 1.78   | 247.0758 | x                                 |                                                |                    |          |
| ISP2   | 2.63   | 277.1229 | x                                 |                                                |                    |          |
| ISP2   | 2.70   | 243.0695 | x                                 |                                                |                    |          |
| ISP2   | 2.94   | 319.1662 | x                                 |                                                |                    |          |

|      |      |          |   |
|------|------|----------|---|
| ISP2 | 7.63 | 311.1686 | x |
| MSF  | 0.59 | 241.0926 | x |
| MSF  | 0.63 | 247.0934 | x |
| MSF  | 0.63 | 257.0777 | x |
| MSF  | 0.81 | 241.0827 | x |
| MSF  | 0.91 | 267.0730 | x |
| MSF  | 0.94 | 257.0774 | x |
| MSF  | 1.16 | 301.0923 | x |
| MSF  | 1.30 | 245.1140 | x |
| MSF  | 1.32 | 331.1030 | x |
| MSF  | 1.34 | 277.0859 | x |
| MSF  | 1.95 | 259.1295 | x |
| MSF  | 2.03 | 295.1395 | x |
| MSF  | 2.41 | 291.0869 | x |
| MSF  | 2.46 | 287.0557 | x |
| MSF  | 2.82 | 275.0922 | x |
| MSF  | 2.82 | 307.0818 | x |
| MSF  | 2.94 | 271.0607 | x |
| MSF  | 2.98 | 301.0713 | x |
| MSF  | 3.21 | 287.1032 | x |
| MSF  | 3.75 | 255.1135 | x |
| MSF  | 3.87 | 255.1135 | x |
| MSF  | 4.40 | 253.1343 | x |
| MSF  | 4.59 | 313.1187 | x |
| MSF  | 5.25 | 269.1307 | x |
| MSF  | 5.43 | 251.0921 | x |
| MSF  | 6.23 | 309.1703 | x |
| MSF  | 6.96 | 265.1579 | x |
| MSF  | 7.01 | 297.1525 | x |
| MSF  | 7.07 | 265.1474 | x |
| MSF  | 7.64 | 311.1680 | x |
| MSF  | 7.91 | 309.1734 | x |
| MSF  | 7.91 | 311.1681 | x |
| MSF  | 8.71 | 293.1786 | x |

**Notes:** 15, 6 and 33 candidate ions were obtained from the A3M, ISP2 and MSF cultures, respectively. According to the MS/MS checking, cattleyatetronates A and B were identified and marked in color.



**Supplementary Table 10.**  $^1\text{H}$  (500 MHz) and  $^{13}\text{C}$  (125 MHz) NMR data for cattlemycins A (**1a**) and D (**1d**) in  $\text{DMSO-}d_6$ .

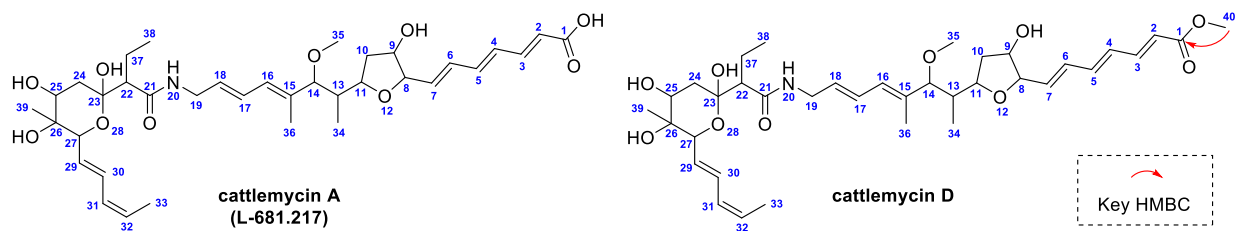

| No. | cattlemycin A*   |                  |                    |                               | cattlemycin D    |                  |                    |                               |
|-----|------------------|------------------|--------------------|-------------------------------|------------------|------------------|--------------------|-------------------------------|
|     | $\delta\text{H}$ | $\delta\text{C}$ | HMBC               | $^1\text{H-}^1\text{H}$ NOESY | $\delta\text{H}$ | $\delta\text{C}$ | HMBC               | $^1\text{H-}^1\text{H}$ NOESY |
| 1   |                  | 167.5            |                    |                               |                  | 166.5            |                    |                               |
| 2   | 5.89             | 121.7            | 1, 4               | 4                             | 6.00             | 119.9            | 1, 4               | 4                             |
| 3   | 7.22             | 144.0            | 1, 4, 5            | 5                             | 7.30             | 144.7            | 1, 5               | 5                             |
| 4   | 6.42             | 129.4            | 2, 3, 6            | 2                             | 6.43             | 129.1            | 2, 6               | 2                             |
| 5   | 6.73             | 140.1            | 3, 6, 7            | 3, 7                          | 6.78             | 140.9            | 3, 7               | 3, 7                          |
| 6   | 6.31             | 130.4            | 4, 5, 8            | 8                             | 6.32             | 130.3            | 4, 8               | 8                             |
| 7   | 6.01             | 136.7            | 5, 6, 8            | 5, 8                          | 6.03             | 137.3            | 5, 8               | 5, 8                          |
| 8   | 4.23             | 83.0             | 6                  | 6, 7, 10                      | 4.24             | 82.9             | 6                  | 6, 7, 10                      |
| 9   | 4.18             | 73.3             |                    | 10                            | 4.18             | 73.3             |                    | 10                            |
| 10  | 1.86             | 39.0             | 8, 9, 11           | 8, 11, 34                     | 1.86             | 39.0             | 8, 9, 11           | 8, 11, 34                     |
| 11  | 4.47             | 76.5             | 14, 34             | 8, 10, 13, 34                 | 4.47             | 76.5             | 34                 | 8, 10, 13, 34                 |
| 12  |                  |                  |                    |                               |                  |                  |                    |                               |
| 13  | 1.59             | 39.0             | 34                 | 11, 14                        | 1.59             | 39.0             | 34                 | 11, 14                        |
| 14  | 3.32             | 88.7             | 11, 13, 16, 35, 36 |                               | 3.32             | 88.7             | 11, 13, 16, 35, 36 |                               |
| 15  |                  | 135.3            |                    |                               |                  | 135.2            |                    |                               |
| 16  | 5.95             | 128.4            | 14, 17, 18, 36     | 18                            | 5.95             | 128.4            | 14, 18, 36         | 18                            |
| 17  | 6.45             | 126.3            | 19                 | 19, 36                        | 6.45             | 126.3            | 19                 | 19, 36                        |
| 18  | 5.64             | 130.0            | 16, 19             | 16, 19                        | 5.64             | 130.0            | 16, 19             | 16, 19                        |
| 19  | 3.97             | 40.2             | 17, 18, 21         |                               | 3.97             | 40.2             | 17, 18, 21         |                               |
| 20  | 3.74             |                  |                    |                               | 3.74             |                  |                    |                               |
| 21  | 8.39             |                  | 19, 21             | 22, 19                        | 8.39             |                  | 19, 21             | 22, 19                        |
| 22  |                  | 174.2            |                    |                               |                  | 174.2            |                    |                               |
| 23  | 2.32             | 55.0             | 20, 23, 37, 38     | 20, 24, 37, 38                | 2.32             | 55.0             | 20, 23, 37, 38     | 20, 37, 38                    |
| 24  |                  | 97.8             |                    |                               |                  | 97.8             |                    |                               |
| 25  | 1.88             | 39.0             | 23, 25, 26         | 37                            | 1.88             | 39.0             | 23, 25, 26         | 37                            |
| 26  | 1.18             |                  |                    |                               | 1.18             |                  |                    |                               |
| 27  | 3.74             | 70.8             | 26, 39             | 24, 27                        | 3.74             | 70.8             | 26                 | 24, 27                        |
| 28  |                  | 73.0             |                    |                               |                  | 73.0             |                    |                               |
| 29  | 4.14             | 73.5             | 26, 29, 30, 39     | 25                            | 4.14             | 73.5             |                    | 25                            |
| 30  |                  |                  |                    |                               |                  |                  |                    |                               |
| 31  | 5.79             | 130.1            | 27, 31             | 31                            | 5.79             | 130.1            | 27, 31             | 31                            |
| 32  | 6.46             | 124.5            | 27, 32             | 33                            | 6.46             | 124.5            |                    | 33                            |
| 33  | 6.01             | 129.3            | 29, 33             | 29, 32                        | 6.00             | 129.3            | 29, 33             | 29, 32                        |
| 34  | 5.41             | 124.3            | 30, 33             | 31, 33                        | 5.40             | 124.3            | 30, 33             | 31, 33                        |
| 35  | 1.70             | 13.1             | 31, 32             | 30, 32                        | 1.69             | 13.1             | 31, 32             | 30, 32                        |
| 36  | 0.62             | 9.9              | 11, 13, 14         | 10, 14, 36                    | 0.62             | 9.9              | 11, 13, 14         | 10, 14, 36                    |
| 37  | 3.06             | 55.4             | 14                 |                               | 3.06             | 55.4             | 14                 |                               |
| 38  | 1.56             | 10.4             | 14, 15, 16         | 17, 34                        | 1.56             | 10.4             | 14, 15, 16         | 17, 34                        |
| 39  | 1.57             | 20.4             | 21, 22, 23, 38     | 38                            | 1.57             | 20.4             | 21, 22, 38         | 38                            |
| 40  | 0.84             | 11.8             | 22, 37             | 22, 37                        | 0.84             | 11.8             | 22, 37             | 22, 37                        |
| 41  | 0.82             | 13.3             | 25, 26, 27         | 29                            | 0.82             | 13.3             | 25, 26, 27         | 29                            |
| 42  |                  |                  |                    |                               |                  |                  |                    |                               |
| 43  | 3.67             | 51.2             | 1                  |                               |                  |                  |                    |                               |

\* The NMR spectra of **1a** were consistent with the reported spectra in reference<sup>2</sup>.

**Supplementary Table 11.**  $^1\text{H}$  (600 MHz) and  $^{13}\text{C}$  (125 MHz) NMR data for butyrolactols A (**2a**) and B (**2b**) in  $\text{DMSO-}d_6$ .

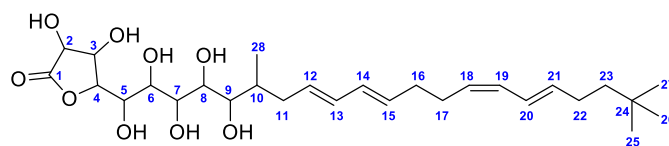

butyrolactol A

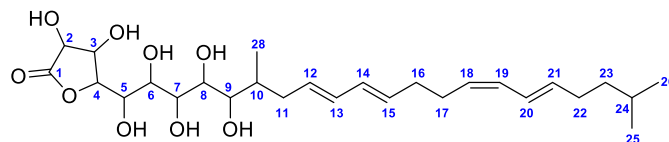

butyrolactol B

| No.   | butyrolactol A*  |                            | butyrolactol B   |                            |
|-------|------------------|----------------------------|------------------|----------------------------|
|       | $\delta\text{C}$ | $\delta\text{H}$ (J in Hz) | $\delta\text{C}$ | $\delta\text{H}$ (J in Hz) |
| 1     | 174.8            |                            | 174.8            |                            |
| 2     | 74.1             | 4.26 (1H, dd, 9.0, 5.2)    | 74.1             | 4.26 (1H, dd, 9.0, 5.2)    |
| 3     | 72.4             | 4.16 (1H, m)               | 72.4             | 4.16 (1H, m)               |
| 4     | 79.4             | 4.33 (1H, m)               | 79.4             | 4.33 (1H, m)               |
| 5     | 66.3             | 3.63 (1H, m)               | 66.3             | 3.63 (1H, m)               |
| 6     | 68.2             | 3.72 (1H, m)               | 68.2             | 3.72 (1H, m)               |
| 7     | 68.3             | 3.72 (1H, m)               | 68.3             | 3.72 (1H, m)               |
| 8     | 69.0             | 3.49 (1H, m)               | 69.0             | 3.49 (1H, m)               |
| 9     | 72.5             | 3.35 (1H, m)               | 72.5             | 3.35 (1H, m)               |
| 10    | 35.6             | 1.69 (1H, m)               | 35.6             | 1.69 (1H, m)               |
| 11    | 35.9             | 2.44 (1H, m)               | 35.9             | 2.44 (1H, m)               |
|       |                  | 1.86 (1H, m)               |                  | 1.86 (1H, m)               |
| 12    | 131.3            | 5.61-5.56 (1H, m)          | 131.3            | 5.61-5.56 (1H, m)          |
| 13    | 131.4            | 5.98 (1H, m)               | 131.4            | 5.98 (1H, m)               |
| 14    | 130.7            | 6.04 (1H, m)               | 130.7            | 6.04 (1H, m)               |
| 15    | 130.7            | 5.57-5.51 (1H, m)          | 130.7            | 5.57-5.51 (1H, m)          |
| 16    | 32.0             | 2.10 (2H, m)               | 32.0             | 2.10 (2H, m)               |
| 17    | 26.9             | 2.22 (2H, m)               | 26.9             | 2.22 (2H, m)               |
| 18    | 128.6            | 5.27 (1H, dt, 10.8, 7.4)   | 128.6            | 5.27 (1H, dt, 10.8, 7.4)   |
| 19    | 128.9            | 5.93 (1H, m)               | 128.9            | 5.93 (1H, m)               |
| 20    | 125.1            | 6.31 (1H, m)               | 125.4            | 6.31 (1H, m)               |
| 21    | 135.3            | 5.66 (1H, dt, 14.6, 7.0)   | 134.7            | 5.65 (1H, dt, 14.5, 6.9)   |
| 22    | 27.5             | 2.05 (2H, m)               | 30.0             | 2.09 (2H, m)               |
| 23    | 43.1             | 1.24 (2H, m)               | 37.9             | 1.24 (2H, m)               |
| 24    | 30.0             |                            | 26.9             | 1.52 (1H, m)               |
| 25-27 | 29.1             | 0.88 (9H, s)               | 22.3             | 0.87 (6H, d, 6.6)          |
| 28    | 15.6             | 0.77 (3H, d, 6.7)          | 15.6             | 0.77 (3H, d, 6.7)          |

\* The NMR spectra of **2a** were consistent with the reported spectra in reference<sup>3</sup>.

**Supplementary Table 12.**  $^1\text{H}$  NMR (600 MHz) and  $^{13}\text{C}$  NMR (150 MHz) NMR data of cattleyatetronate A (**3a**) in  $\text{MeOH-}d_4$ .

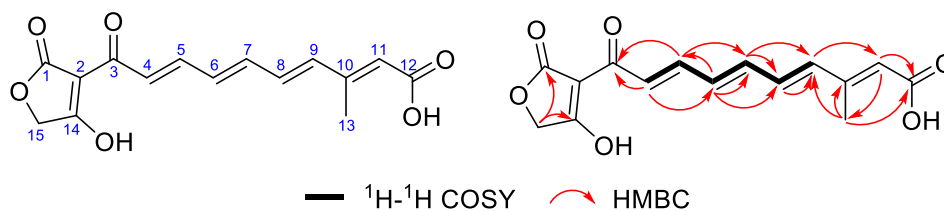

| No. | $\delta_{\text{C}}$ | $\delta_{\text{H}}$ (J in Hz) | $^1\text{H-}^1\text{H}$ COSY | HMBC          |
|-----|---------------------|-------------------------------|------------------------------|---------------|
| 1   | 179.1               |                               |                              |               |
| 2   | 98.2                |                               |                              |               |
| 3   | 185.8               |                               |                              |               |
| 4   | 131.0               | 7.51 (1H, dd, 15.1)           | 5                            | 3, 6          |
| 5   | 140.8               | 7.30 (1H, dd, 15.1, 11.2)     | 4, 6                         | 3, 7          |
| 6   | 133.6               | 6.54 (1H, m)                  | 5, 7                         | 5, 7, 8       |
| 7   | 140.9               | 6.67 (1H, dd, 14.6, 10.7)     | 6, 8                         | 5, 6, 8, 9    |
| 8   | 131.7               | 6.58 (1H, m)                  | 7, 9                         | 9             |
| 9   | 141.4               | 6.44 (1H, d, 15.1)            | 8                            | 7, 8, 11, 13  |
| 10  | 142.2               |                               |                              |               |
| 11  | 131.3               | 5.95 (1H, s)                  |                              | 9, 12, 13     |
| 12  | 176.3               |                               |                              |               |
| 13  | 13.9                | 2.14 (3H, s)                  |                              | 9, 10, 11, 12 |
| 14  | 197.2               |                               |                              |               |
| 15  | 71.2                | 4.26 (2H, s)                  |                              | 1, 14         |

## Supplementary Figures.

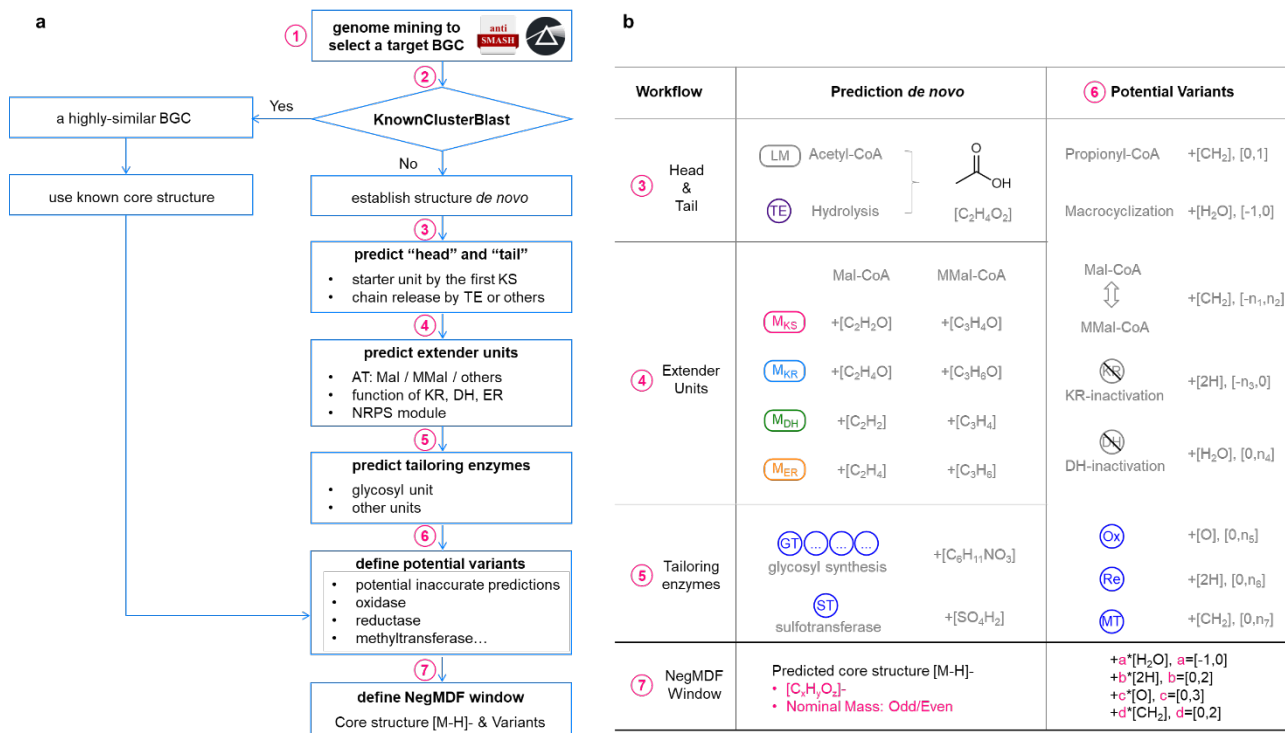

**Supplementary Fig. 1. The workflow for the structural prediction of T1PKs.** **a.** The general steps for definition of the MDF window. **b.** The detailed steps for structural establishment *de novo* was performed according to loading module, extender modules, and chain release enzymes. The variation from tailoring enzymes and potential inaccurate prediction was considered, resulting in a specific region named NegMDF window.

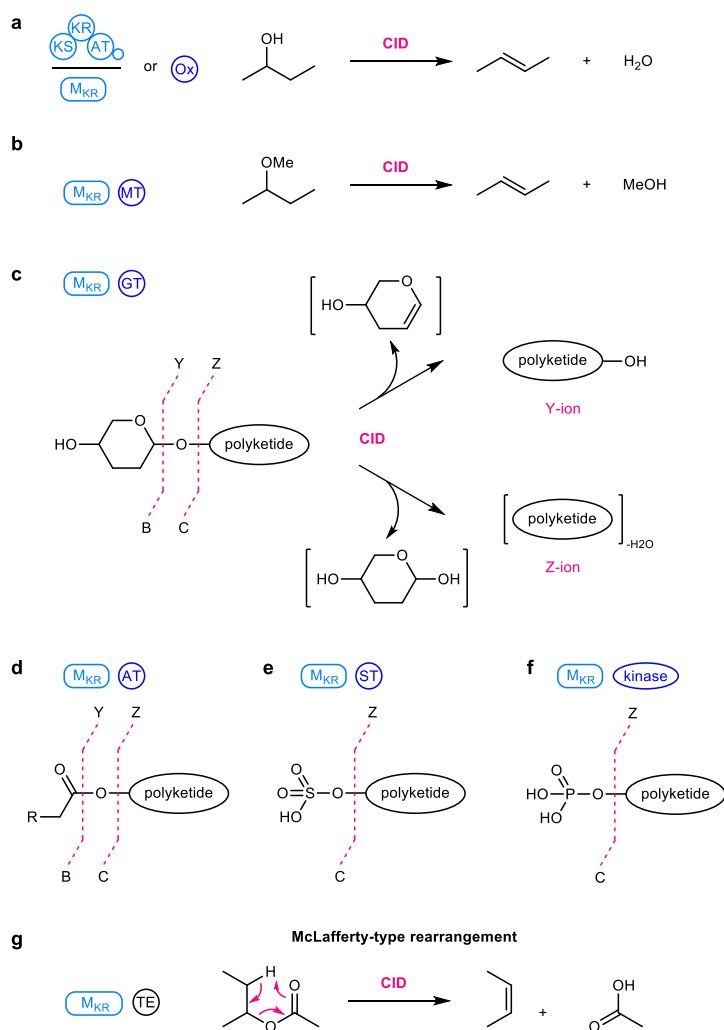

| Fragmentation pattern |                                    |                                |                    |
|-----------------------|------------------------------------|--------------------------------|--------------------|
| Type                  | Unit                               | Mass shift                     | Examples           |
| a                     | H <sub>2</sub> O                   | 18.0106                        | 148                |
| b                     | MeOH                               | 32.0262                        | 38                 |
| c                     | glycosyl                           |                                | 44                 |
|                       | amicetose                          | (B-Y) 114.0681                 | e.g. r104          |
|                       | 4-O-methyl rhodnose                | (B-Y) 128.0837                 | e.g. r113, r115    |
|                       | digitoxose                         | (B-Y) 130.0630                 | e.g. r104          |
|                       | arabinose                          | (B-Y) 132.0424                 | e.g. r147, r148    |
|                       | forosamine                         | (B-Y) 141.1154                 | e.g. r206-r210     |
|                       | chalcose                           | (B-Y) 144.0786                 | e.g. r218, r219    |
|                       | mycarose                           | (B-Y) 144.0786                 | e.g. r206-r209     |
|                       | oleandrose                         | (B-Y) 144.0786                 | e.g. r216          |
|                       | mycosamine                         | (B-Y) 145.0739                 | e.g. r185, s6-s8   |
|                       | rhamnose                           | (B-Y) 146.0574                 | e.g. r144          |
|                       | desosamine                         | (B-Y) 157.1103                 | e.g. r216, r217    |
|                       | madpyranose                        | (B-Y) 158.0943                 | e.g. r112          |
|                       | glucose                            | (B-Y) 162.0524                 | e.g. r205, r64-r70 |
|                       | mycaminose                         | (B-Y) 173.1052                 | e.g. r206-r210, s3 |
|                       | mycinose                           | (B-Y) 174.0892                 |                    |
|                       | 4-O-acetyl arcanose                | (B-Y) 200.1049                 | e.g. r218          |
| d                     | acyl                               |                                | 72                 |
|                       | CH <sub>3</sub> COOH               | (B-Y) 42.0106<br>(C-Z) 60.0211 |                    |
|                       | C <sub>2</sub> H <sub>5</sub> COOH | (B-Y) 56.0262<br>(C-Z) 74.0368 |                    |
|                       | NH <sub>2</sub> COOH               | (B-Y) 43.0058                  |                    |
| e                     | SO <sub>4</sub> H <sub>2</sub>     | (C-Z) 97.9674                  | 1 (e.g. r143)      |
| f                     | PO <sub>4</sub> H <sub>3</sub>     | (C-Z) 97.9769                  | 1 (e.g. r71)       |

**Supplementary Fig. 2. The C-O cleavages observed in T1PKs.** In most cases, this cleavage occurs through a  $\beta$ -elimination-like mechanism, accompanied by the formation of new unsaturated bonds in the fragments. The McLafferty-type rearrangement was classified as the  $\beta$ -elimination of ester for simplification in this work.

a.  $\alpha$ -cleavage of hydroxy

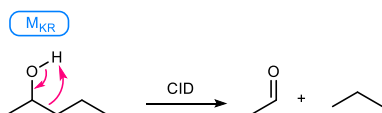

b. 1,3-cleavage

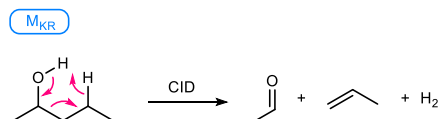

c. 1,4-cleavage

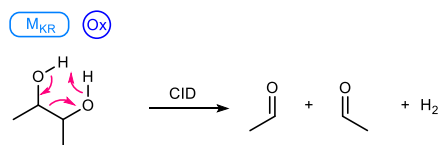

d.  $\alpha$ -cleavage of carboxyl (decarboxylation)

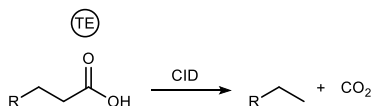

e.  $\alpha$ -cleavage of ketone

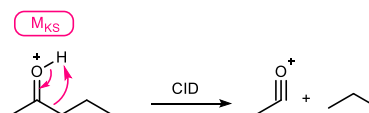

f.  $\alpha$ -cleavage of ketone by McLafferty rearrangement

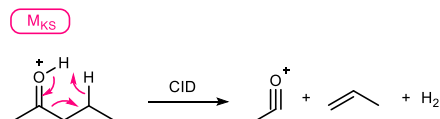

g. oxymethyl cleavage

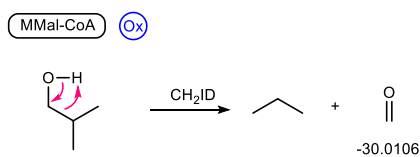

**Supplementary Fig. 3. The  $\alpha$ -cleavages observed in T1PKs.** The  $\alpha$ -cleavage describes the C-C bond cleavage at the  $\alpha$ -position of an oxygen-containing group due to the high polarity of C-O bonds. It is also known as  $\alpha$ -elimination in some references.

cleavage of 3-hydroxyl ketone

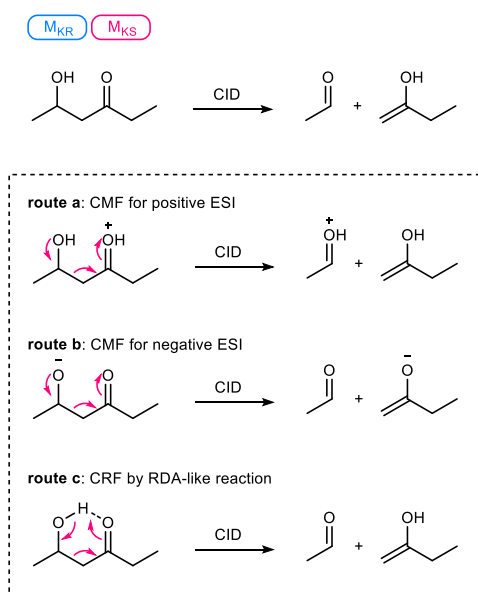

**Supplementary Fig. 4. The retro-aldol cleavages observed in polyketides with 3-hydroxyl ketone.** The fragmentation reactions via charge migration fragmentation (CMF) and charge retention fragmentation (CRF) were introduced in the reference<sup>4</sup>. In CRF reaction, the cleavage of 3-hydroxyl ketone can also proceed with a retro-Diels-Alder(RDA)-like mechanism.

(a) amide cleavage

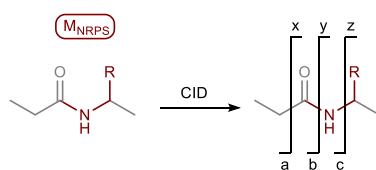

(b) allyl cleavage

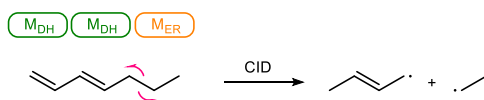

(c) RDA cleavage

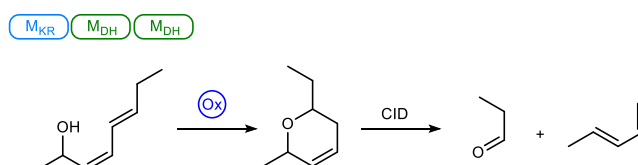

Supplementary Fig. 5. Other CID-reactions observed in polyketides.



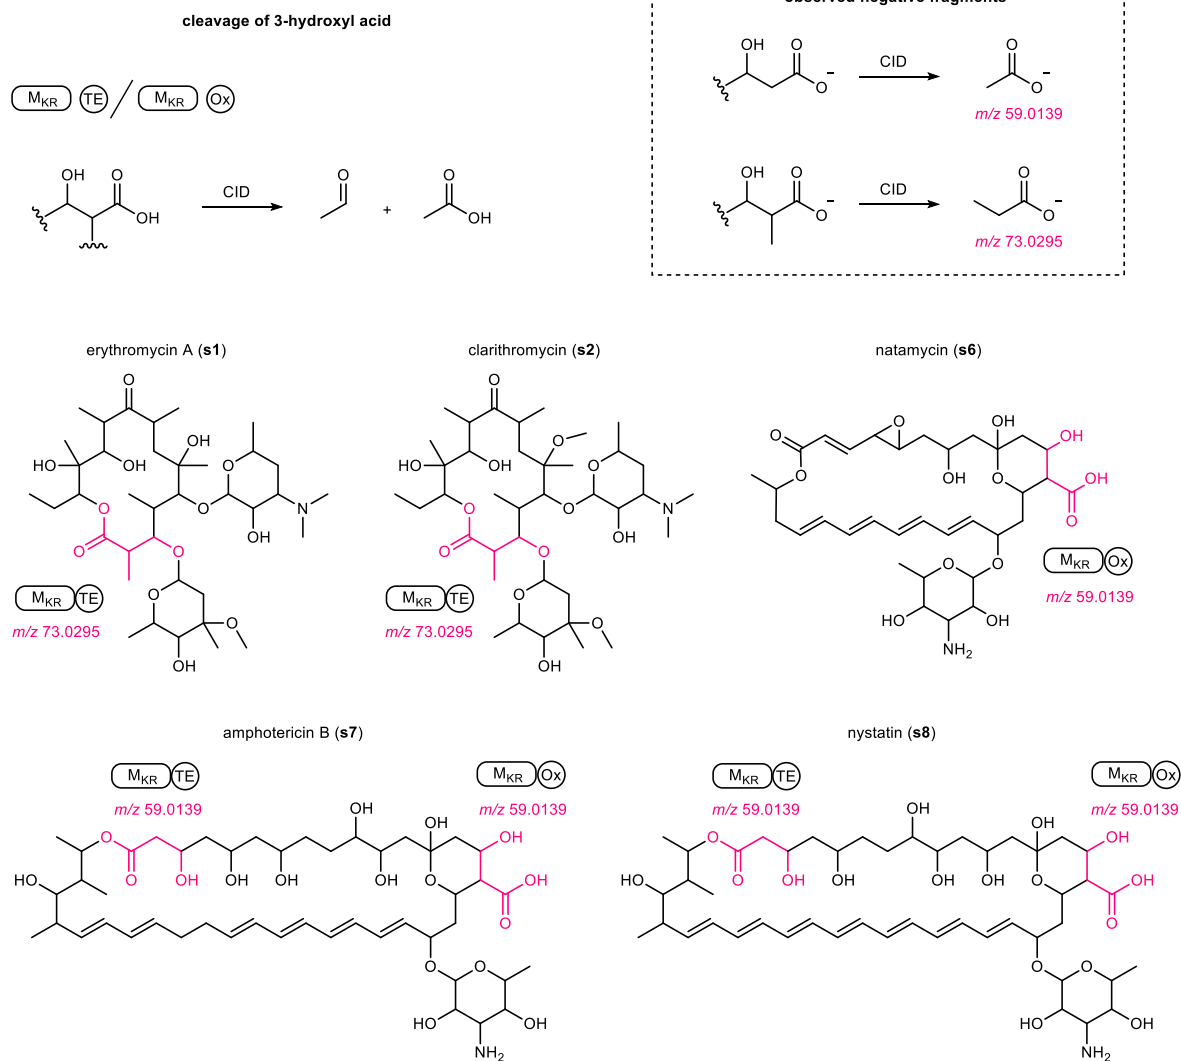

**Supplementary Fig. 6. The retro-aldol cleavages observed in polyketides with 3-hydroxyl acid.**

**a In-source fragmentation of standards**

| No. | -ESI | +ESI     |
|-----|------|----------|
| s1  | weak | weak     |
| s2  | weak | weak     |
| s3  | weak | weak     |
| s4  | weak | moderate |
| s5  | weak | strong   |
| s6  | weak | strong   |
| s7  | weak | strong   |
| s8  | weak | moderate |

**b erythromycin A (s1)**

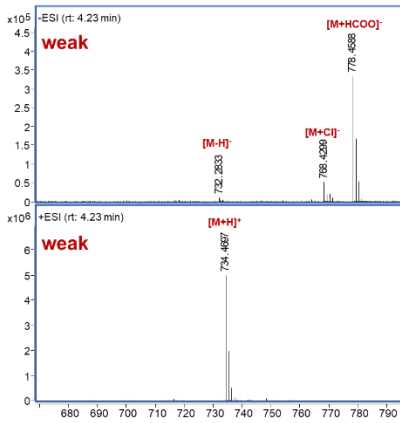

**c clarithromycin (s2)**

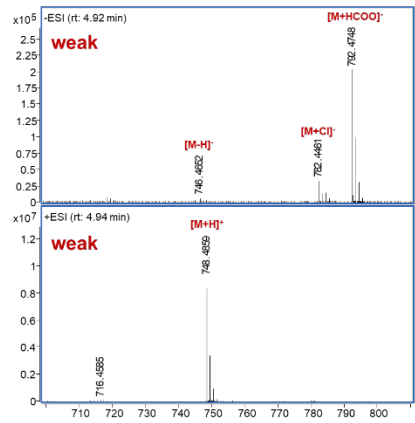

**d midecamycin (s3)**

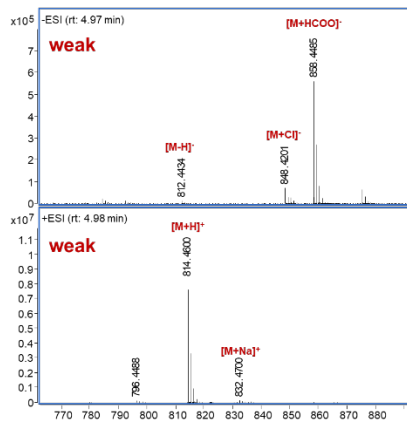

**e rifamycin S (s4)**

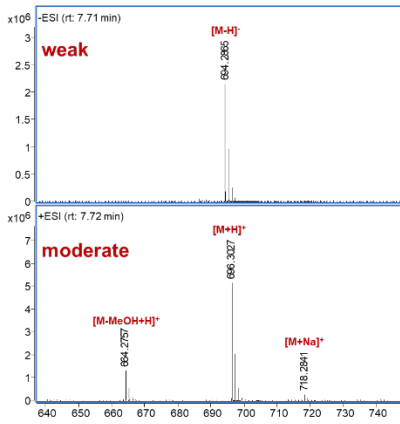

**f rapamycin (s5)**

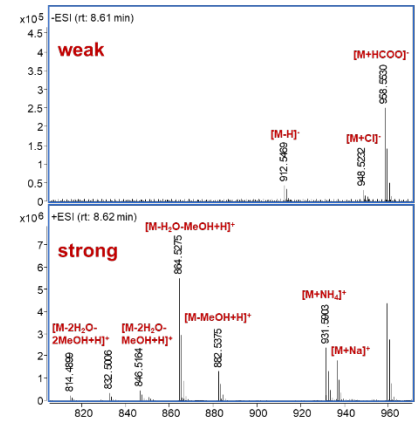

**g natamycin (s6)**

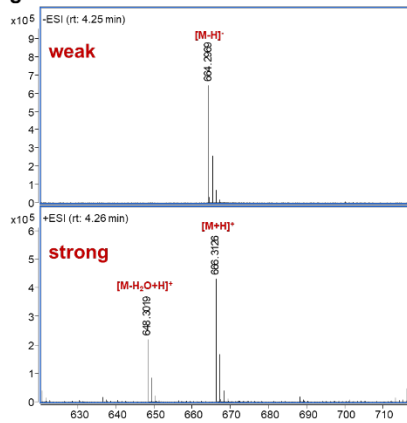

**h amphotericin B (s7)**

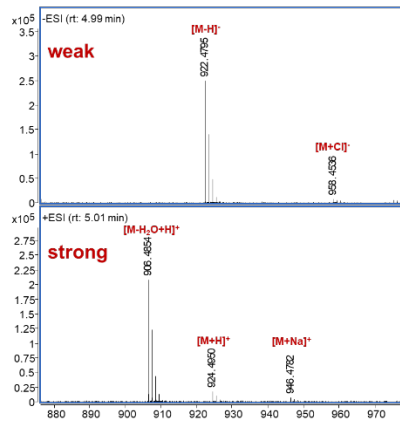

**i nystatin (s8)**

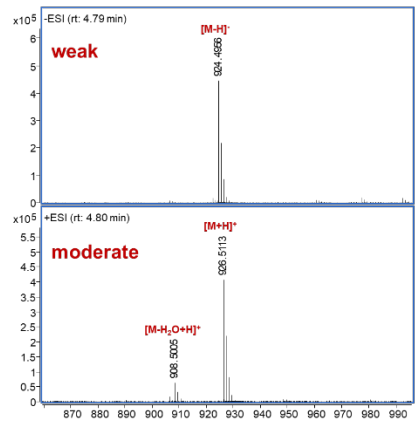

**Supplementary Fig. 7. In-source fragmentation of 8 polyketide standards.**

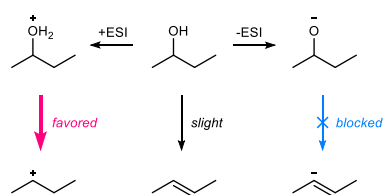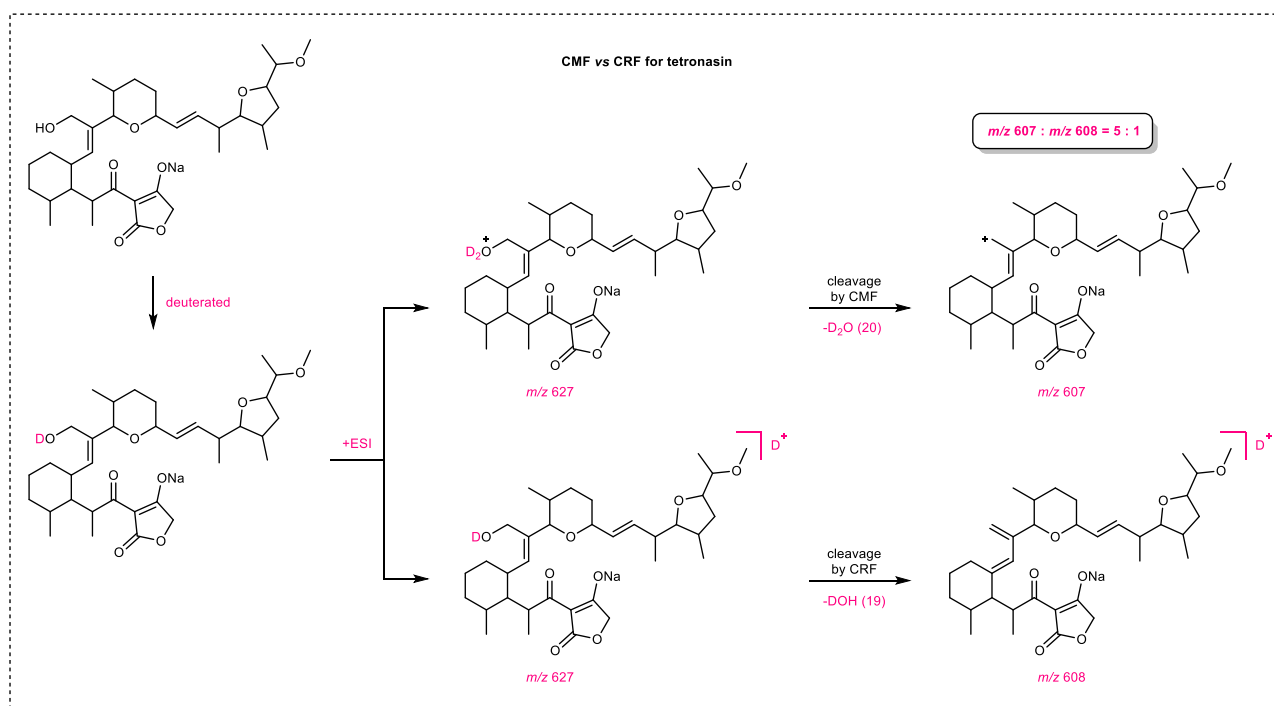

**Supplementary Fig. 8. In-source fragmentation mechanism in positive and negative ESI.** The formal  $\beta$ -elimination is favored on the positive ESI mode due to the protonation of a hydroxyl group, while deprotonation blocks this process. For example, dehydration fragments are commonly observed in ESI(+) scan, which can be explained by charge migration fragmentation (CMF) from an oxonium cation. In contrast, under ESI(-) scan, the alkoxide anion could not dehydrate, and dehydration only takes place by the mechanism of less frequent charge retention fragmentation (CRF) of a neutral hydroxyl group. As shown in the fragmentation patterns of deuterated tetronasin<sup>5</sup>, charge migration fragmentation is favored over charge retention fragmentation.

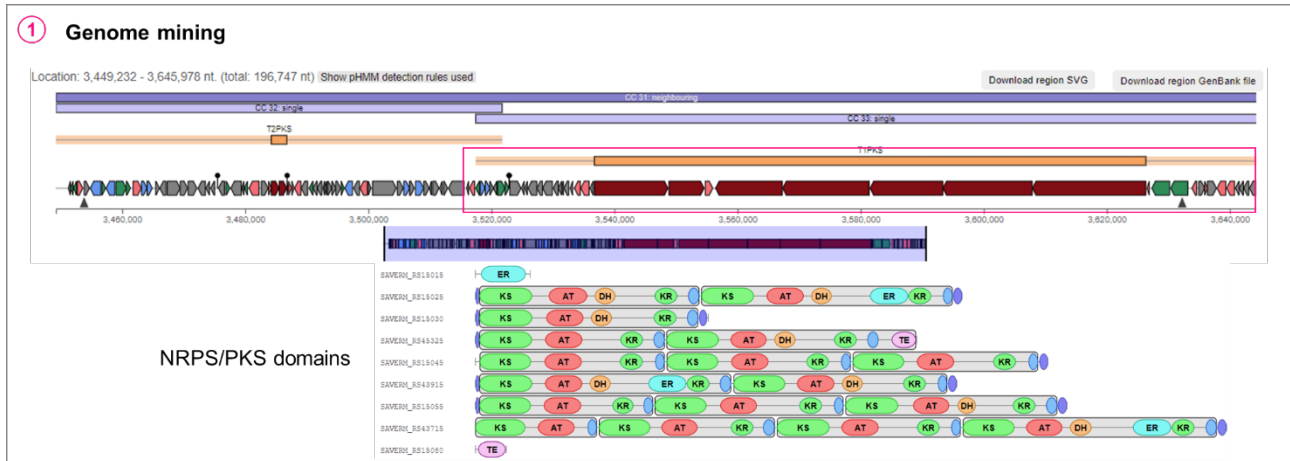

**2 KnownClusterBlast was skipped here.**

The BGC for oligomycin has been reported. The purpose of this case is to illustrate the NegMDF workflow.

**3 predict "head" and "tail"**

LM TE CC(=O)O  
 $C_2H_4O_2$

**4 predict extender units**

- M<sub>KR</sub> \*2 +2\*[C<sub>2</sub>H<sub>4</sub>O]
- Mal M<sub>DH</sub> \*4 +4\*[C<sub>2</sub>H<sub>2</sub>]
- M<sub>ER</sub> \*1 +1\*[C<sub>2</sub>H<sub>4</sub>]
- M<sub>KR</sub> \*6 +6\*[C<sub>3</sub>H<sub>6</sub>O]
- MMal M<sub>DH</sub> \*1 +1\*[C<sub>3</sub>H<sub>4</sub>]
- M<sub>ER</sub> \*1 +1\*[C<sub>3</sub>H<sub>6</sub>]
- EMal M<sub>ER</sub> \*1 +1\*[C<sub>4</sub>H<sub>8</sub>]

= C<sub>44</sub>H<sub>72</sub>O<sub>10</sub>

**5 predict tailoring enzymes**

**6 define potential variants**

| Reactions                   | Variants                   |
|-----------------------------|----------------------------|
| TE cyclization              | -[H <sub>2</sub> O] [0,1]  |
| <del>KR</del> -inactivation | -[2H] [0,3]                |
| <del>DH</del> -inactivation | + [H <sub>2</sub> O] [0,2] |
| Ox oxidation                | + [O] [0,2]                |
| Re reduction                | + [2H] [0,1]               |
| M variable substrate        |                            |
| Mal ⇌ MMal                  | ±[CH <sub>2</sub> ] [0,1]  |

**7 define NegMDF window**

| Core [M-H]-                                           | Variants                          |
|-------------------------------------------------------|-----------------------------------|
| • [C <sub>44</sub> H <sub>71</sub> O <sub>10</sub> ]- | • +a*[H <sub>2</sub> O], a=[-1,2] |
| • Odd only                                            | • +b*[2H], b=[-3,1]               |
|                                                       | • +c*[O], c=[0,2]                 |
|                                                       | • +d*[CH <sub>2</sub> ], d=[-1,1] |

Supplementary Fig. 9. The definition of NegMDF window for oligomycins.

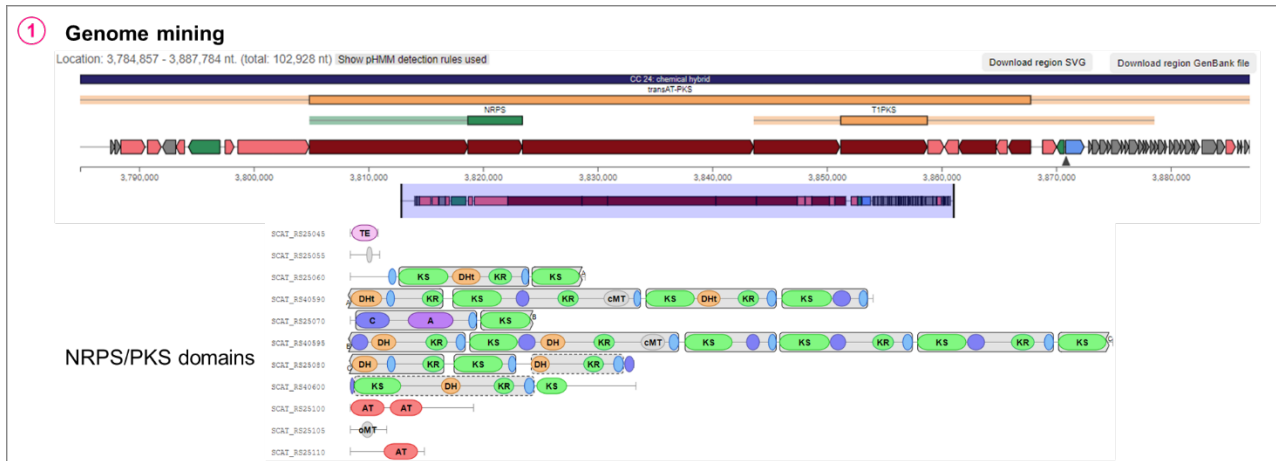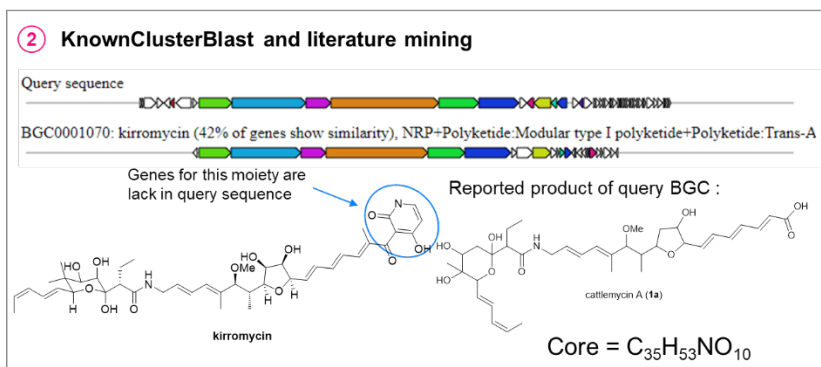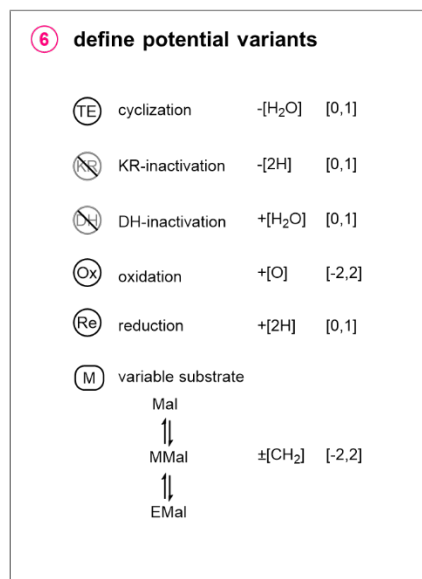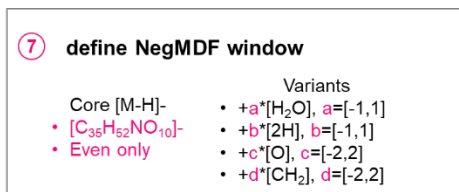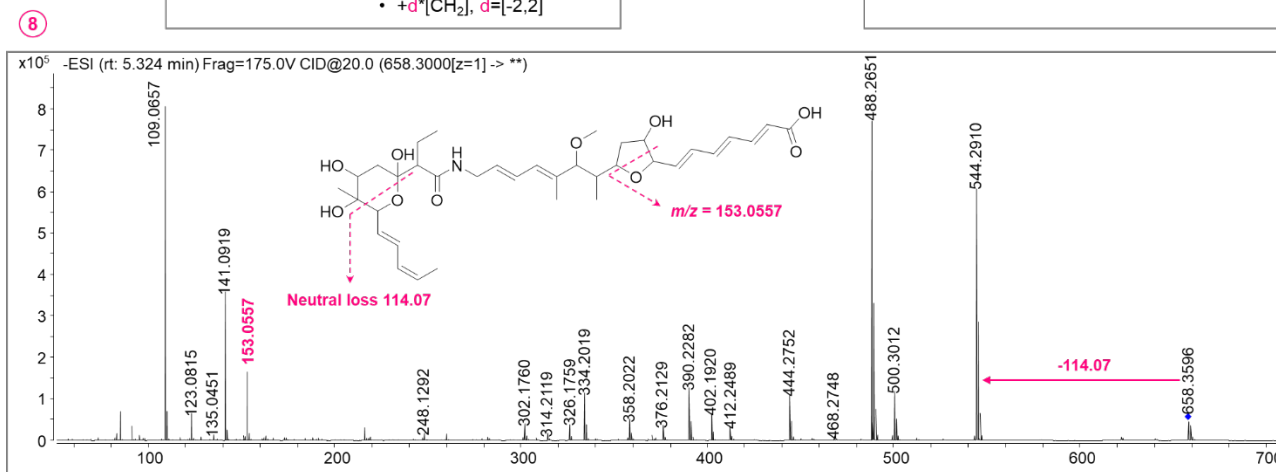

Supplementary Fig. 10. The NegMDF window definition and MS/MS features for cattlemycins.

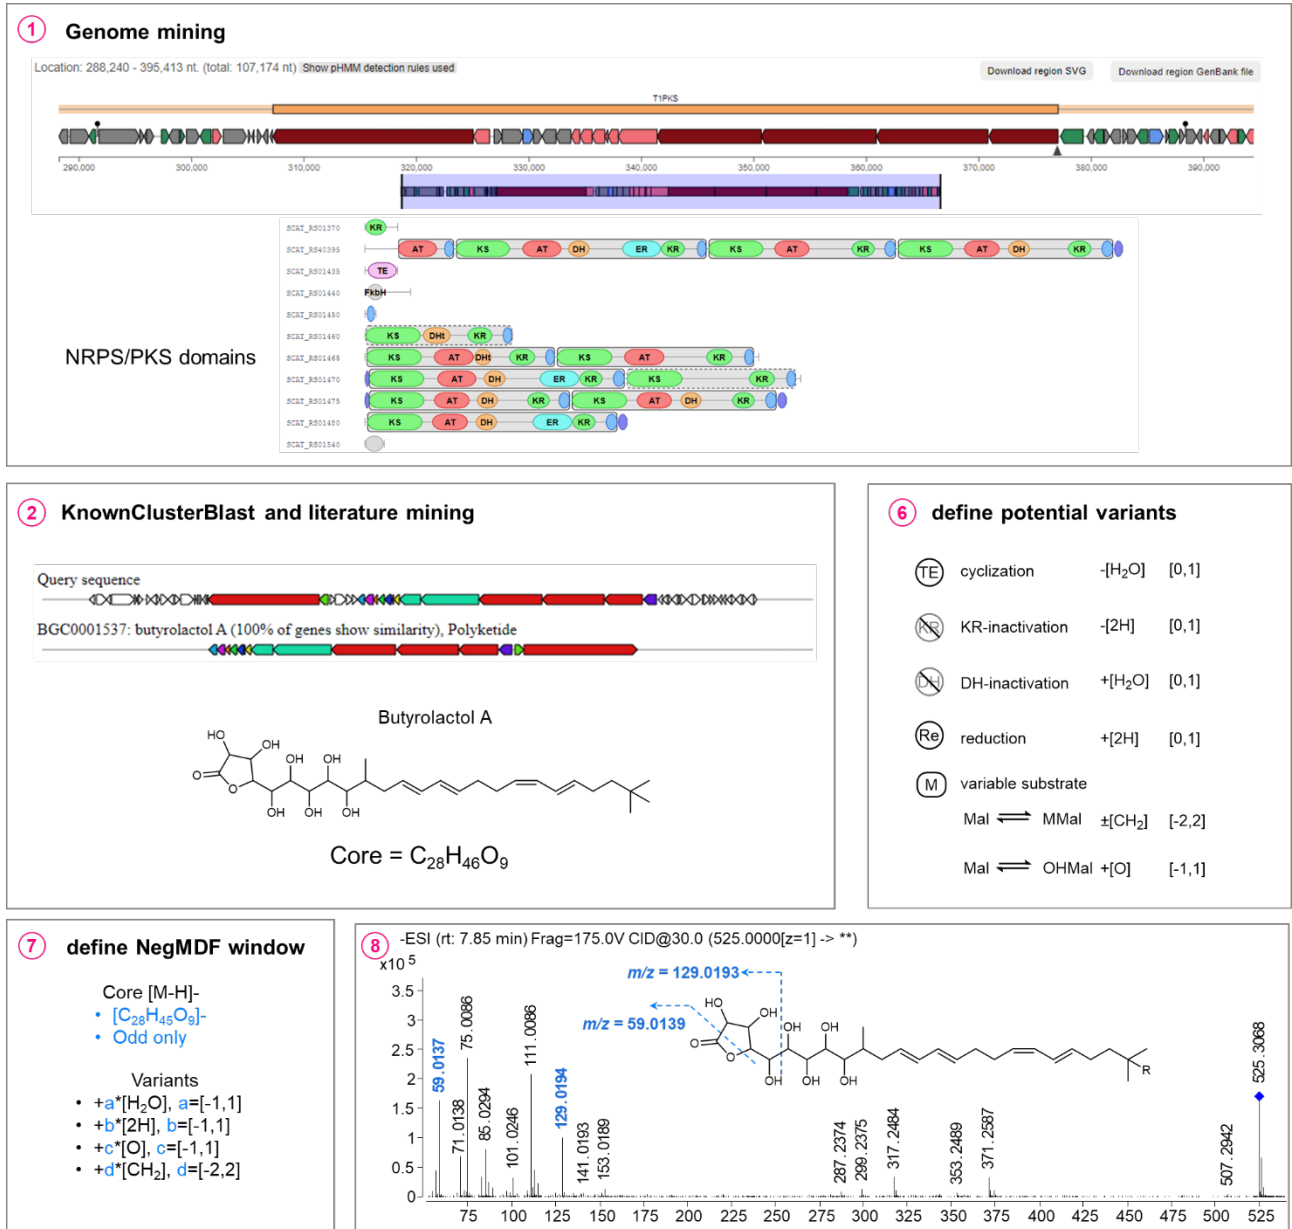

Supplementary Fig. 11. The NegMDF window definition and MS/MS features for butyrolactols.

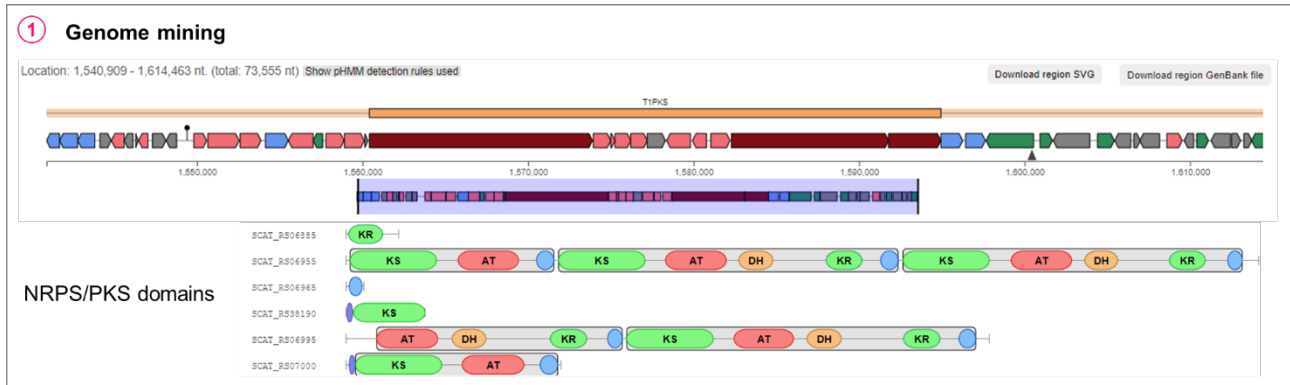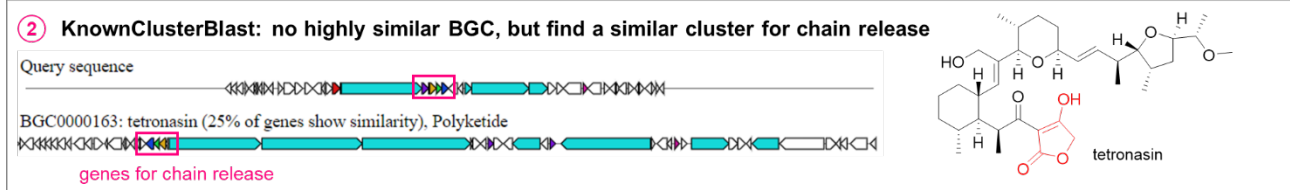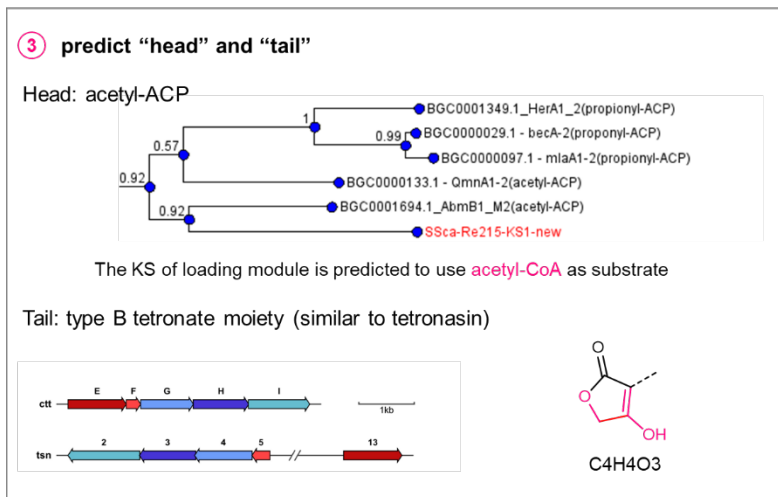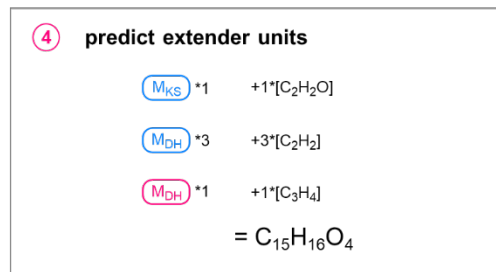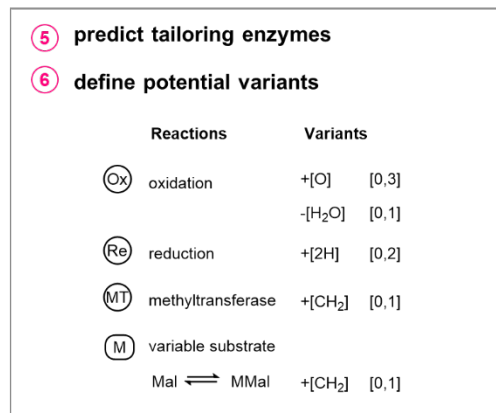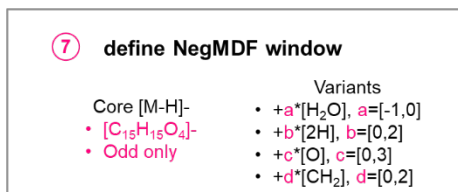

Supplementary Fig. 12. The definition of NegMDF window for cattleyatetronates.

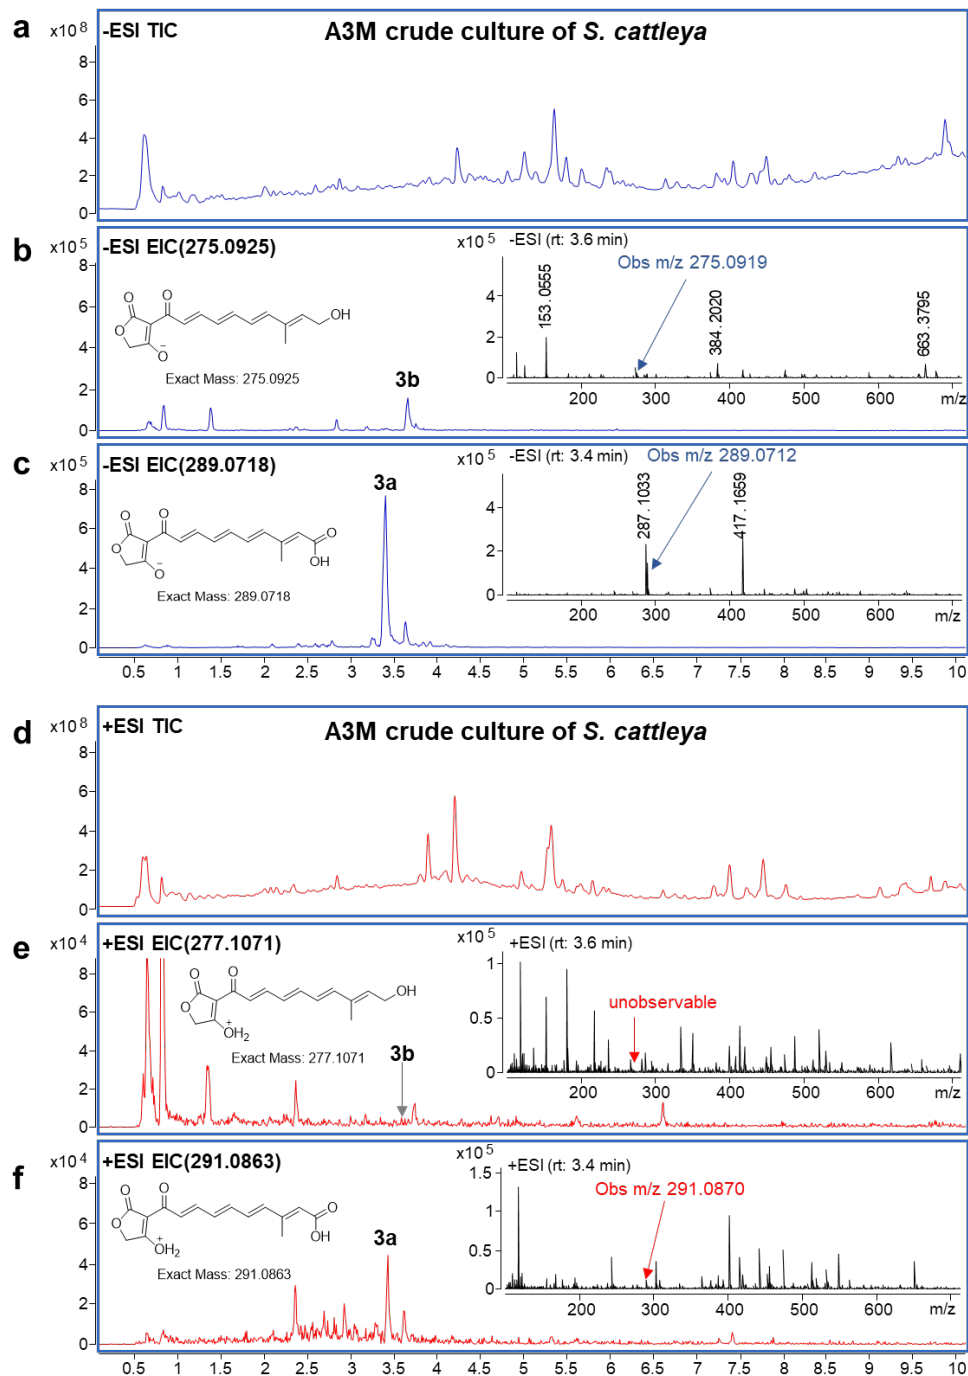

**Supplementary Fig. 13. Detection of cattleyatetronate ions in A3M crude culture of *S. cattleya*.** (a) The total ion chromatogram (TIC) of A3M crude culture of *S. cattleya* in the ESI (-) mode. The EICs spectra of compounds **3b** (b) and **3a** (c) indicate relatively low intensities of cattleyatetronates. (d) The TIC of A3M crude culture of *S. cattleya* in the ESI (+) mode. The EICs spectra of **3b** (e) and **3a** (f) indicate almost undetectable signal of cattleyatetronates under ESI (+).



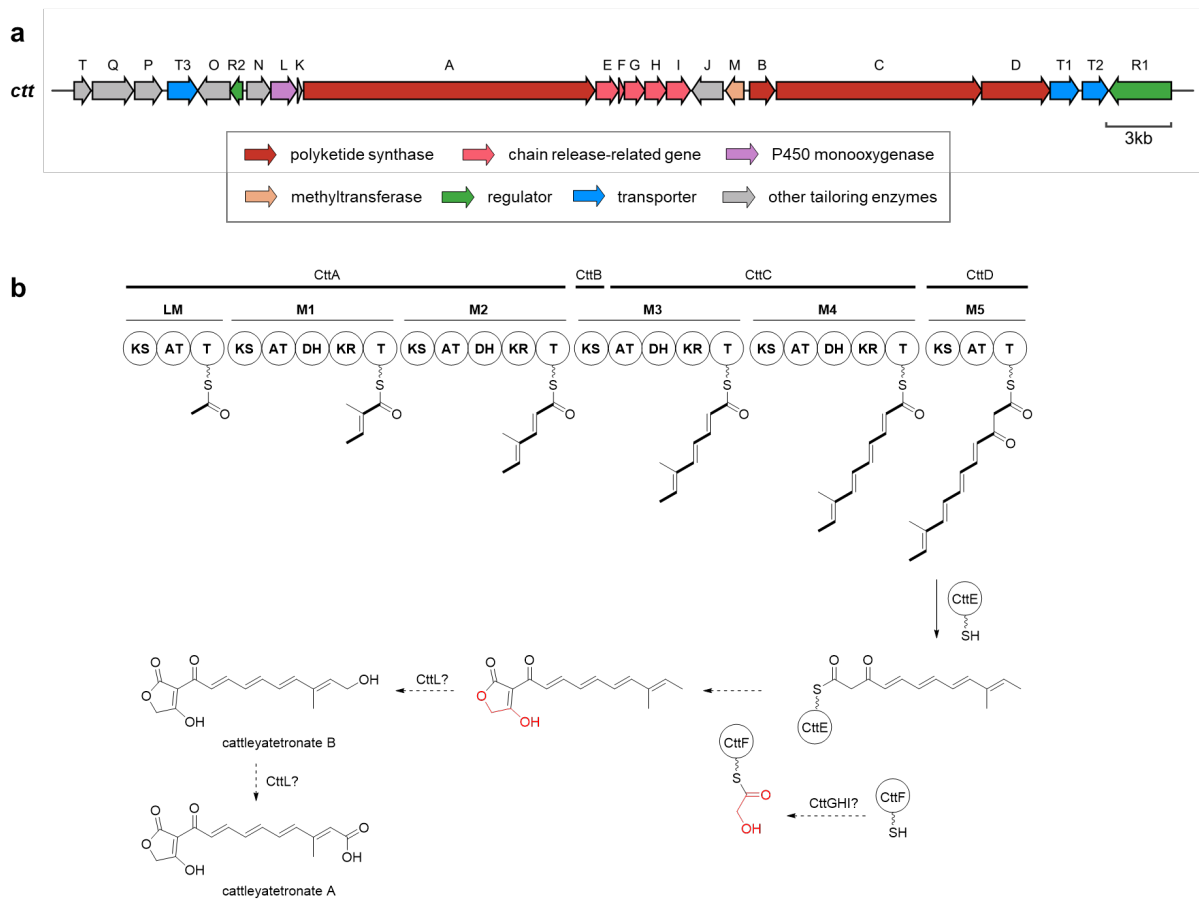

**Supplementary Fig. 14. Proposed biosynthesis of cattleyatetronates. a.** The *ctt* BGC from *S. cattleya* NRRL 8057. **b.** Proposed pathway for biosynthesis.

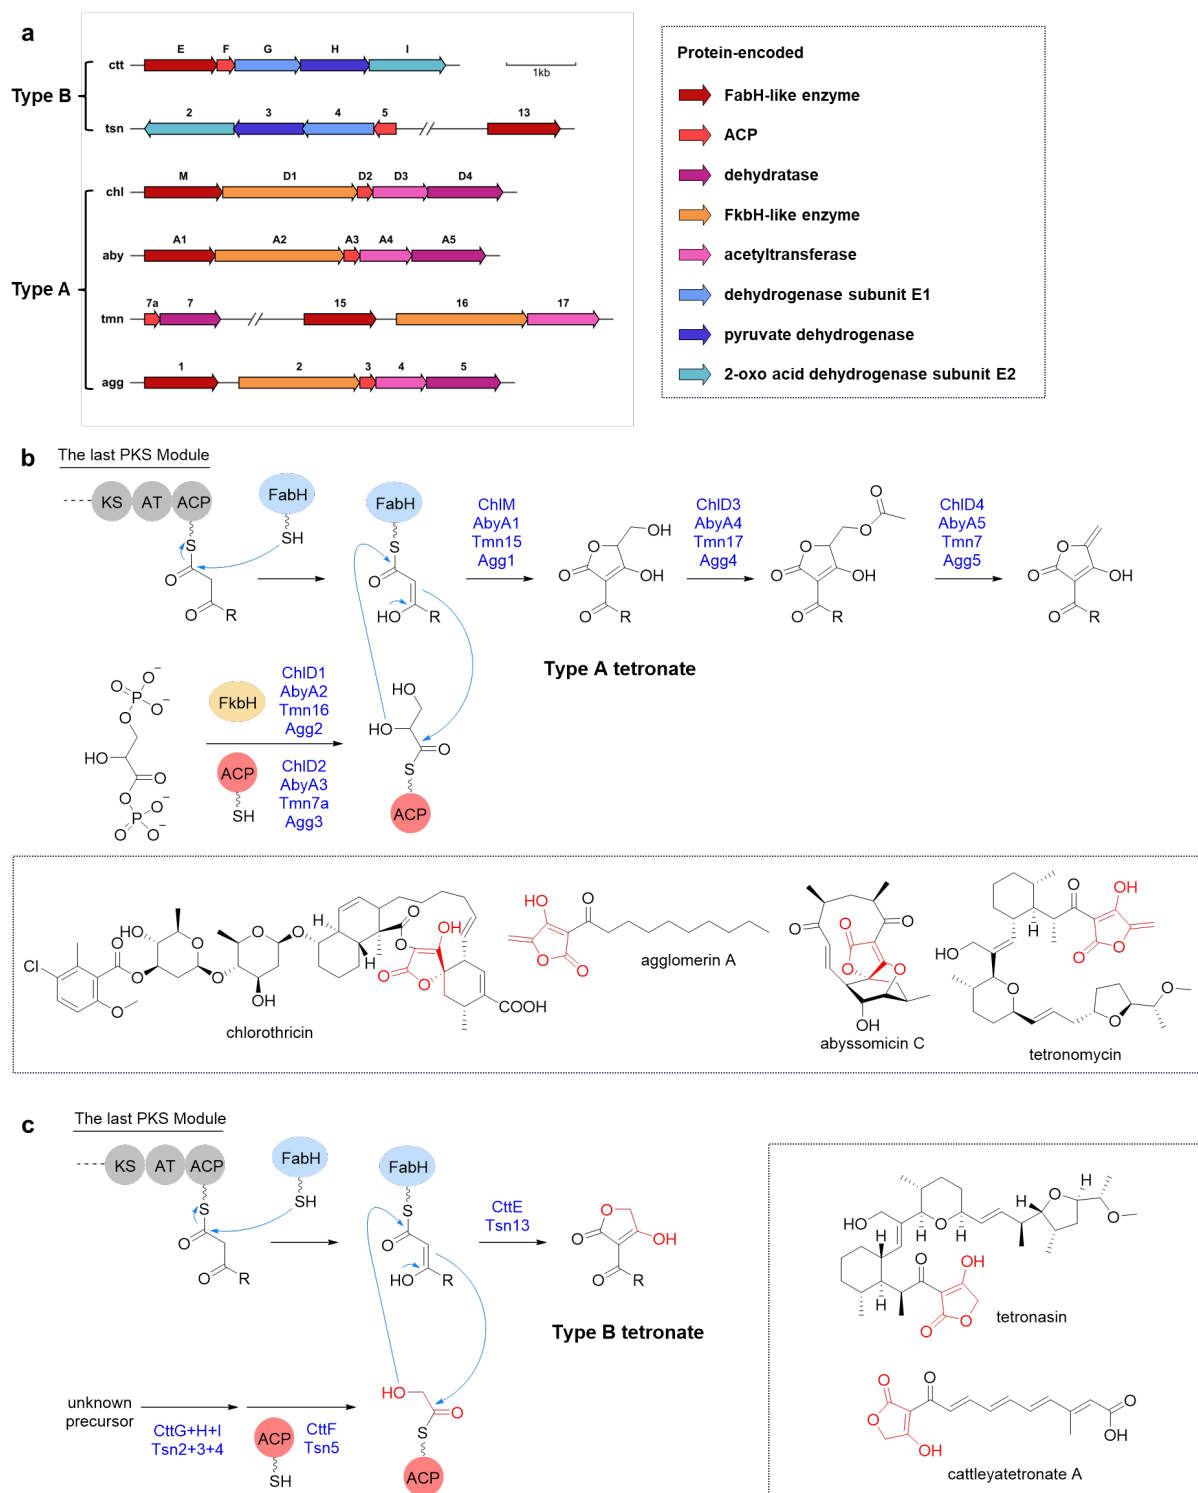

**Supplementary Fig. 15. Two types of tetronate biosynthesis.** **a.** Organization and comparison of the conserved gene clusters for tetronate moieties. Type A cluster includes *aby* BGC for abyssomicin (BGC0000001), *chl* BGC for chlorothricin (BGC0000036), *tmn* BGC for tetronomycin (BGC0000164), and *agg* BGC for agglomerin (reference<sup>6</sup>). Type B includes *tsn* BGC for tetronasin (BGC0000163) and *ctt* BGC discussed in this work. **b.** Biosynthetic pathway of type A tetronate moiety. **c.** Proposed biosynthetic pathway of type B tetronate moiety.

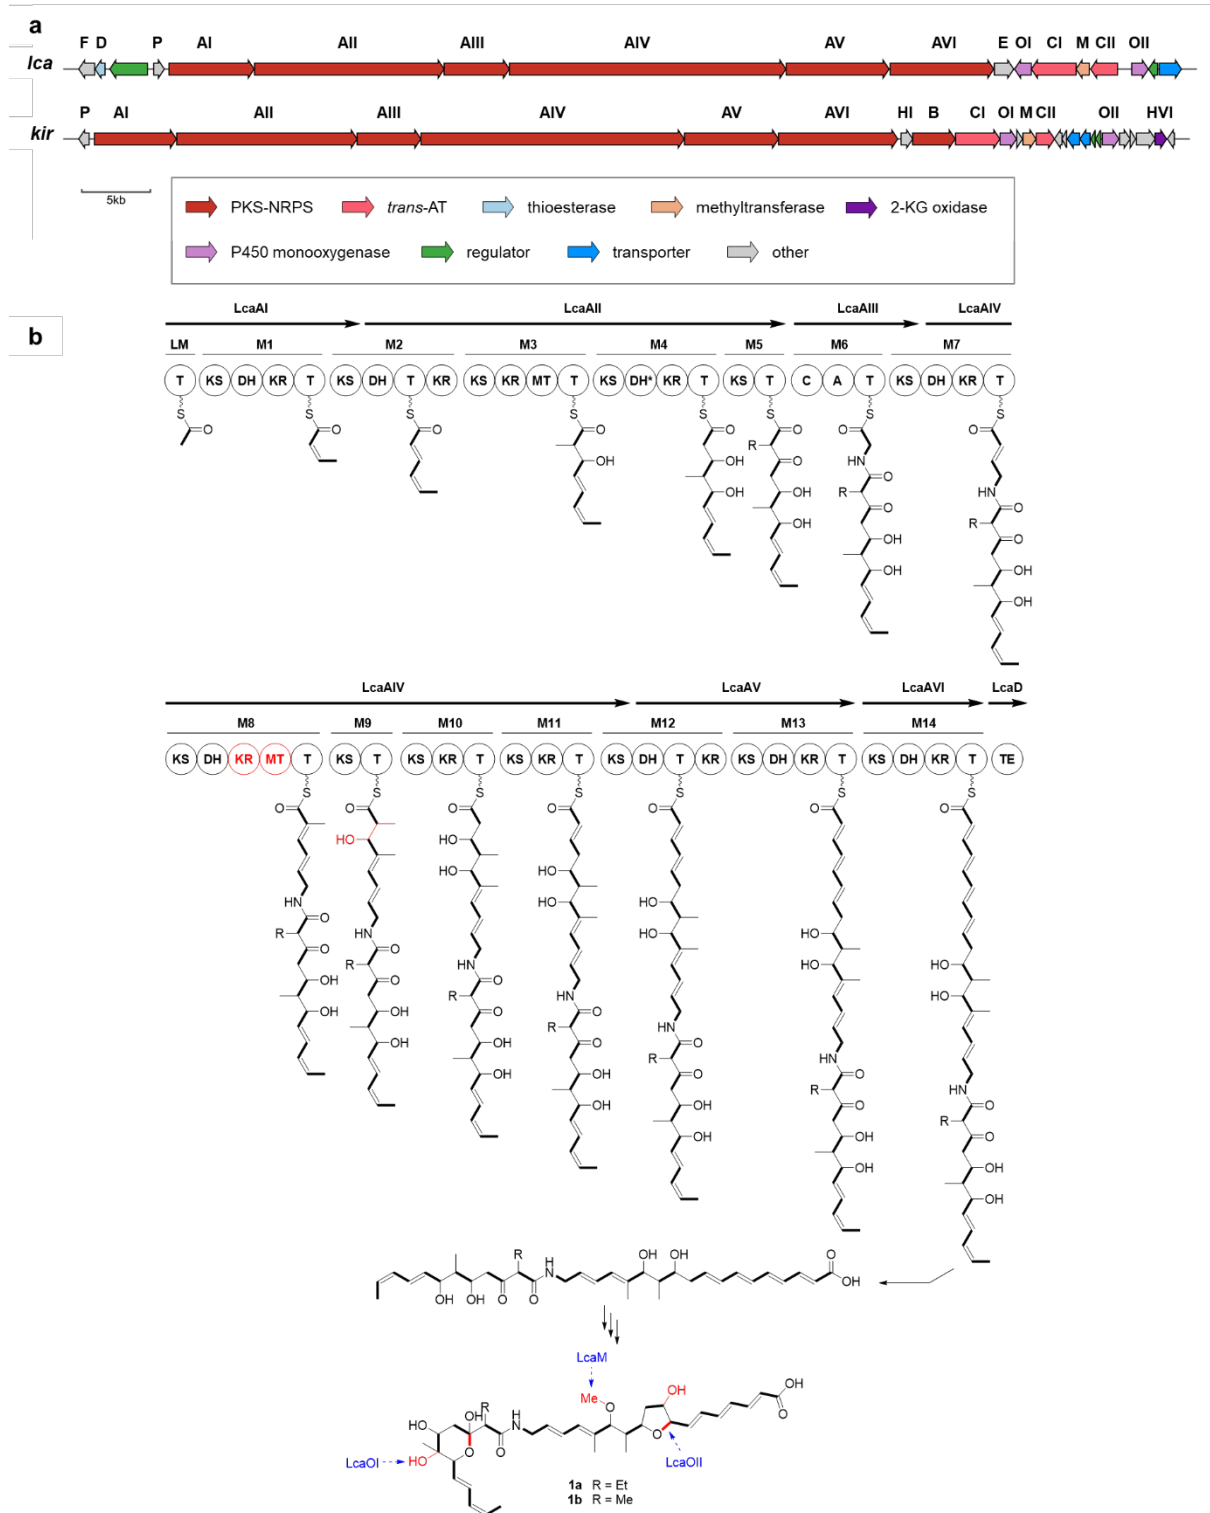

**Supplementary Fig. 16. Proposed biosynthesis of cattlemycins. a.** Comparison of *lca* BGC from *S. cattleya* NRRL 8057 and *kir* BGC from *S. collinus* Tü 365 for kirromycin (MIBiG ID: BGC0001070). **b.** Proposed pathway for cattlemycin (L-681,217) biosynthesis. The M8-KR and M8-MT domains were presumed to be iteratively used in M9 extender units. The function of LcaM, LcaOI and LcaOII were assigned based on their homologies in *kir* BGC.

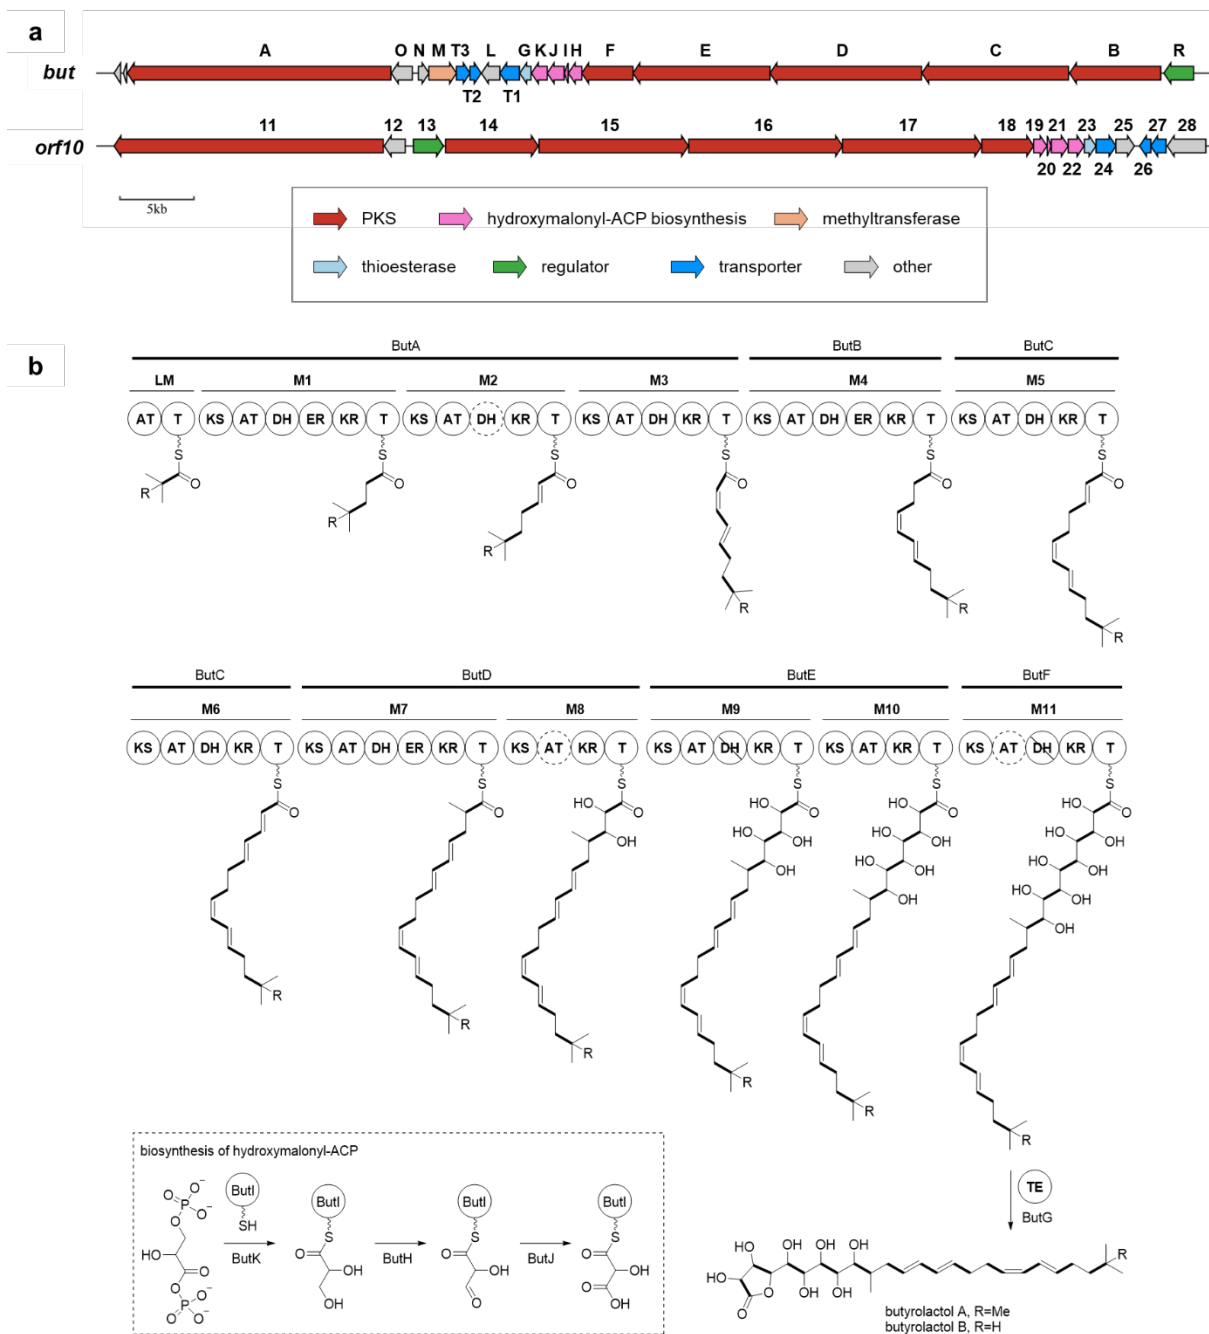

**Supplementary Fig. 17. Proposed biosynthesis of butyrolactols. a.** Comparison of *but* BGC from *S. cattleya* NRRL 8057 and *orf10* BGC from *S. sp.* NBRC 110030 (MIBiG ID: BGC0001537). **b.** Proposed pathway for butyrolactol biosynthesis.

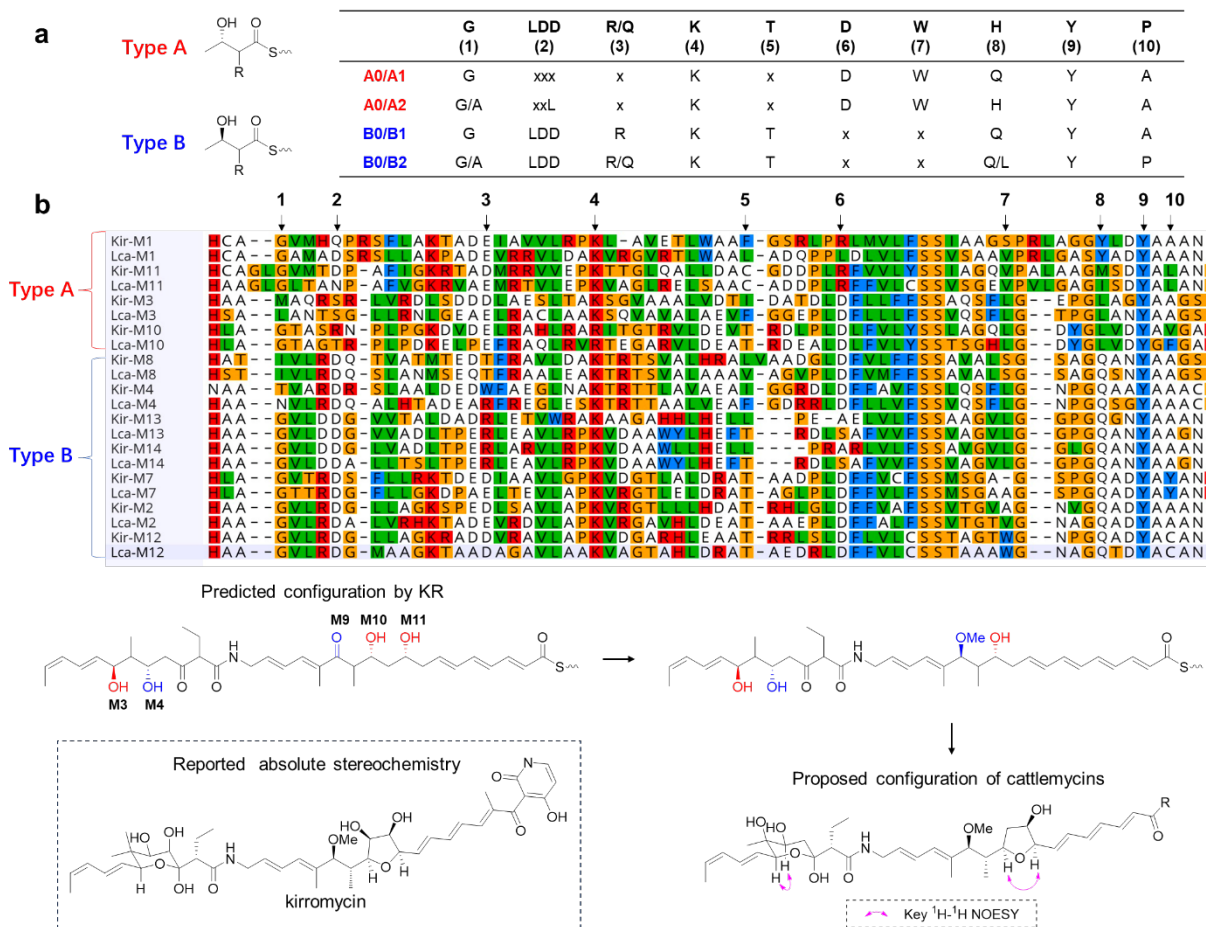

**Supplementary Fig. 18. Bioinformatic analysis of KR domains in cattlemycin BGC.** (a) The key motifs for KR classification in *cis*-AT PKS<sup>7</sup>. (b) The sequence alignment of KR domains from cattlemycin BGC (Lca) and kirromycin BGC (Kir), with position indicated by module number. The module 13 and 14 of them belong to *cis*-AT PKS, and the rest belong to *trans*-AT PKS. B-type KR in *trans*-AT PKS tend to have the second D conserved in the LDD motif, and the sequence alignment suggests high sequence similarity between the corresponding KR domains of the two PKSs. The absolute stereoconfiguration of cattlemycins was proposed based on the absolute stereochemistry of kirromycin<sup>8</sup> and NOESY correlation.

**Supplementary Fig. 19.** Proposed MS/MS fragmentation pathway of cattlemycin A (**1a**,  $m/z$  658) and B (**1b**,  $m/z$  644).

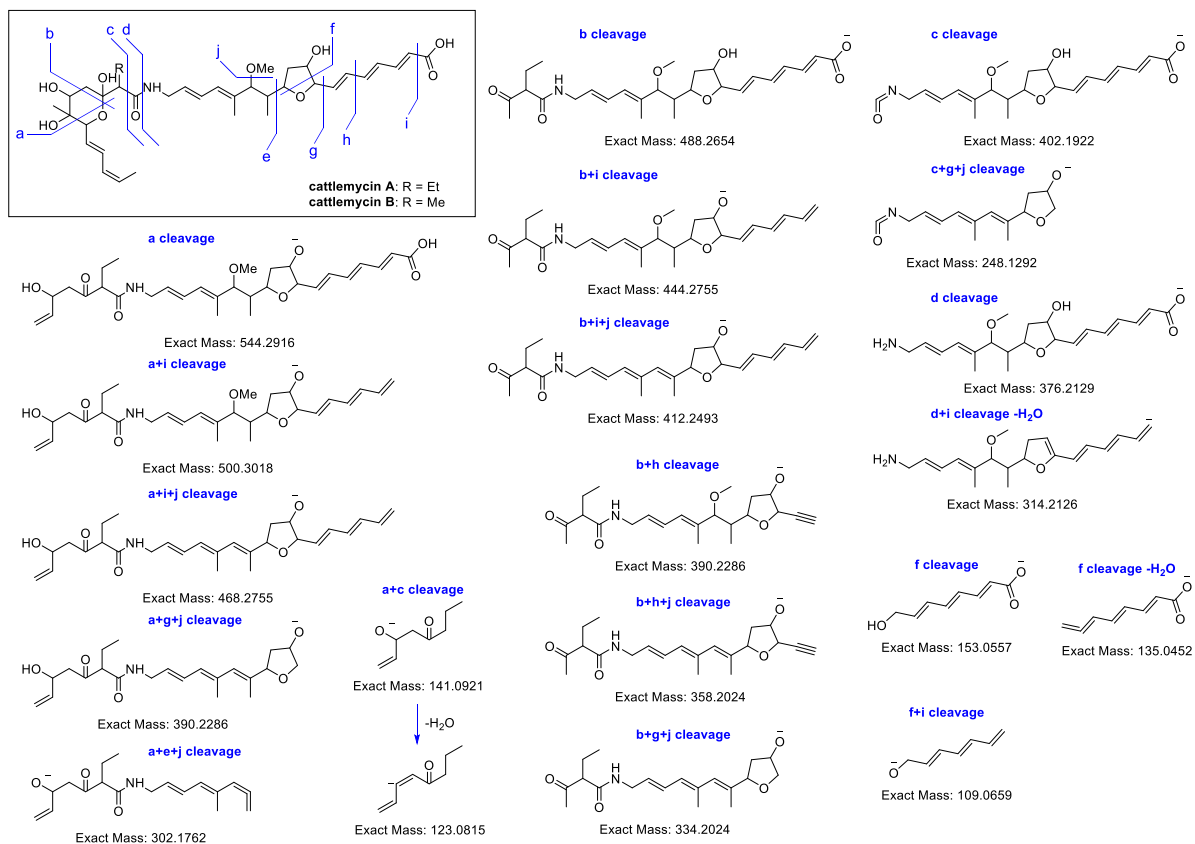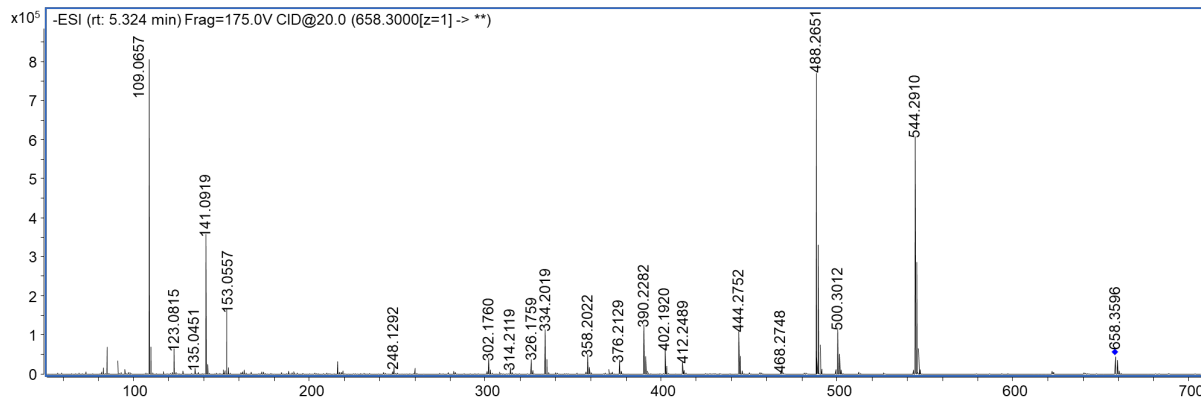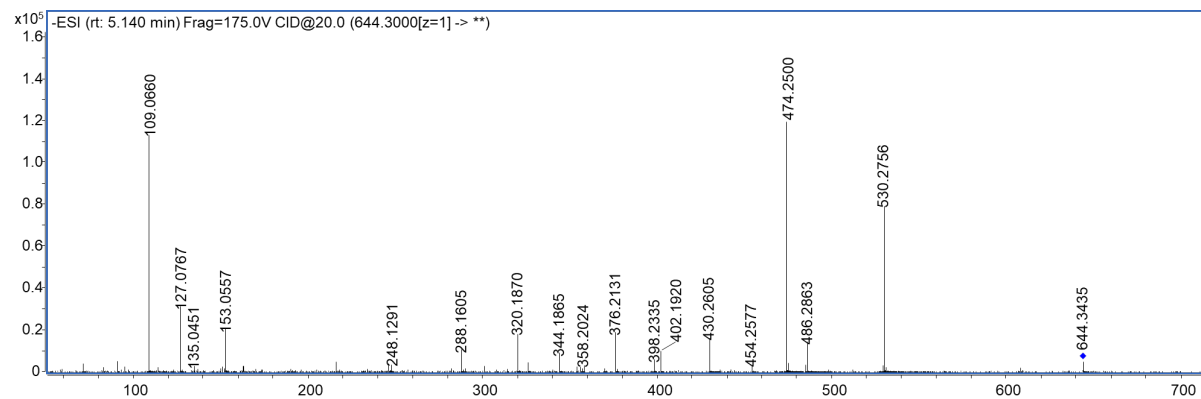

**Supplementary Fig. 20.** Proposed MS/MS fragmentation pathway of cattlemycin C (**1c**, *m/z* 630).

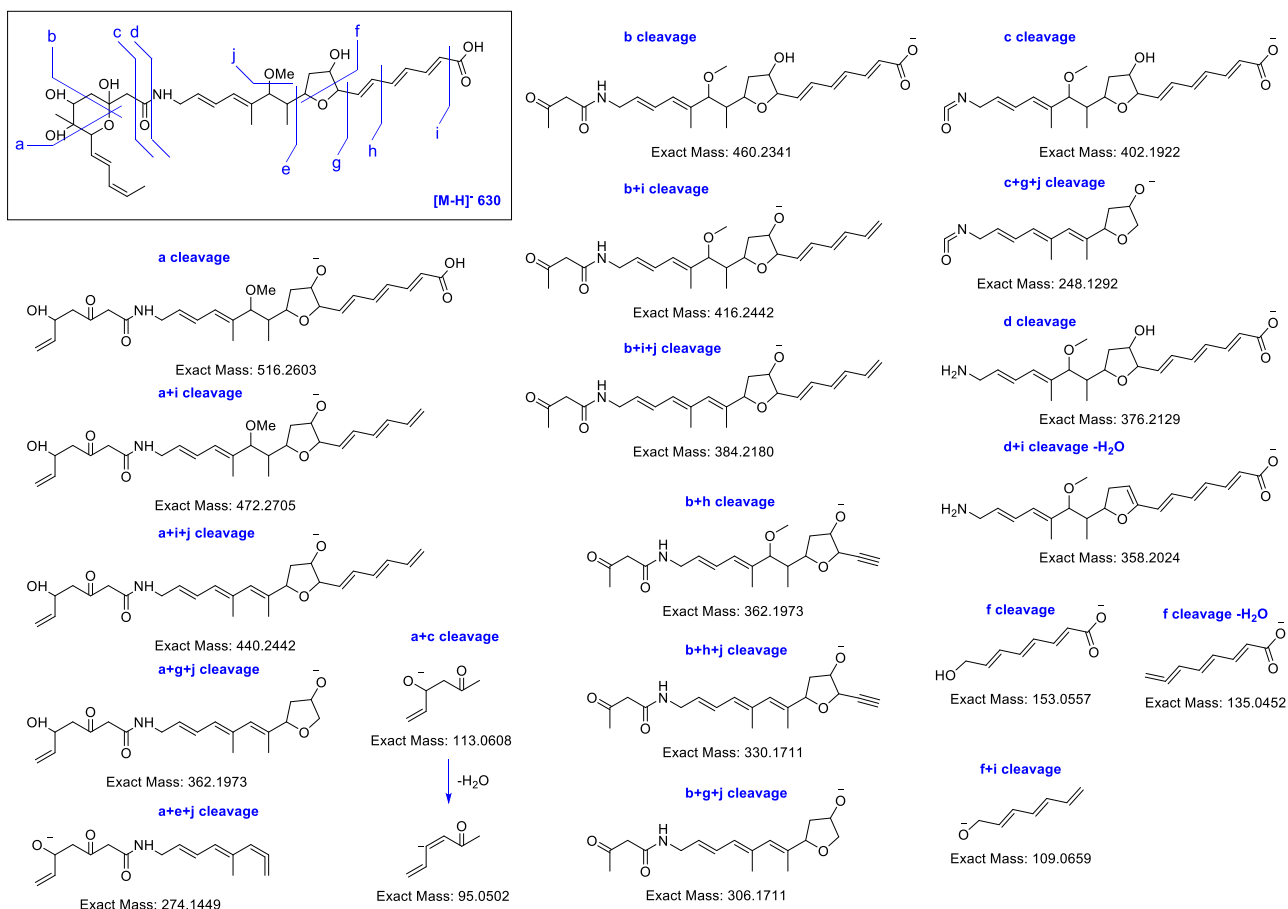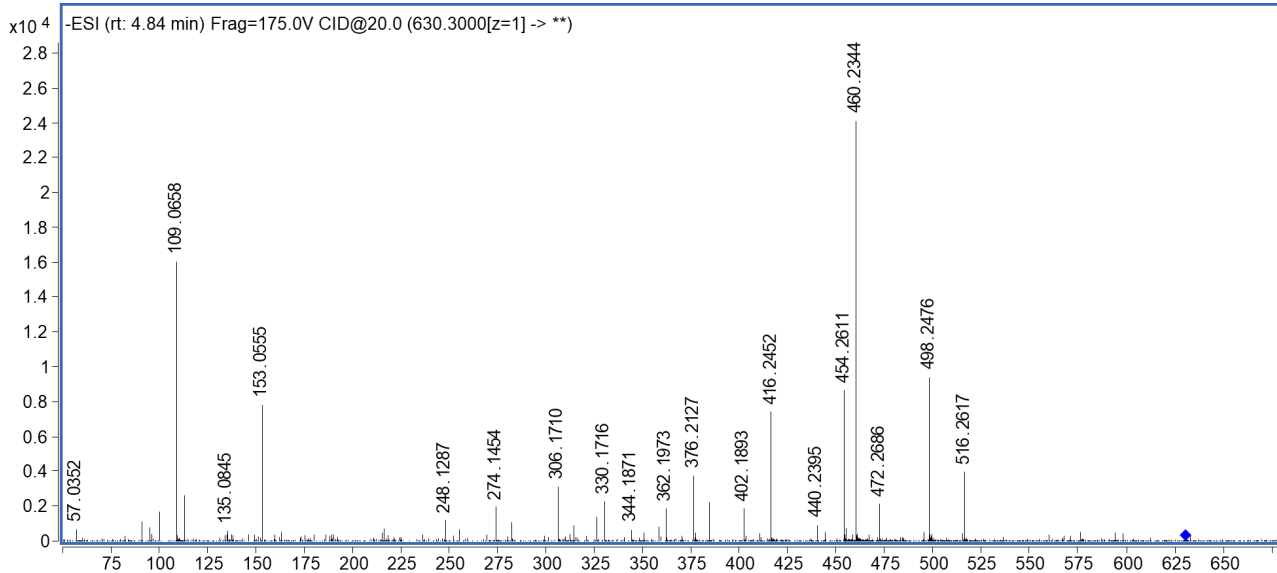

**Supplementary Fig. 21.** Proposed MS/MS fragmentation pathway of cattlemycin D (**1d**,  $m/z$  672).

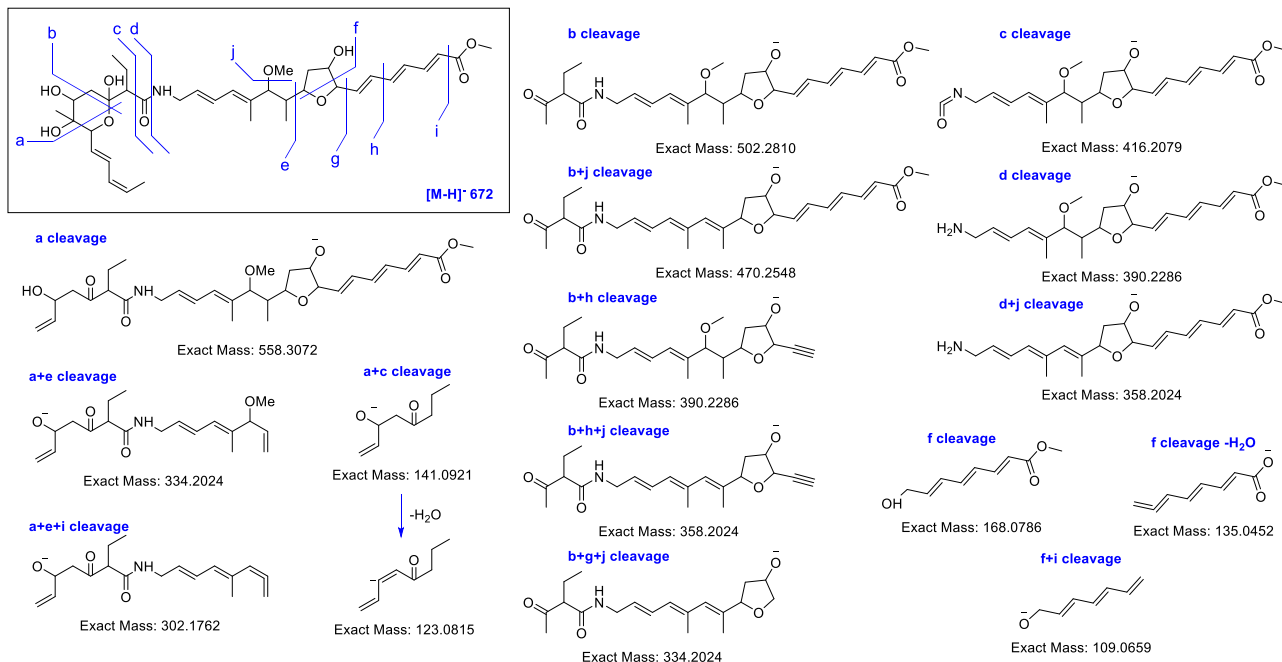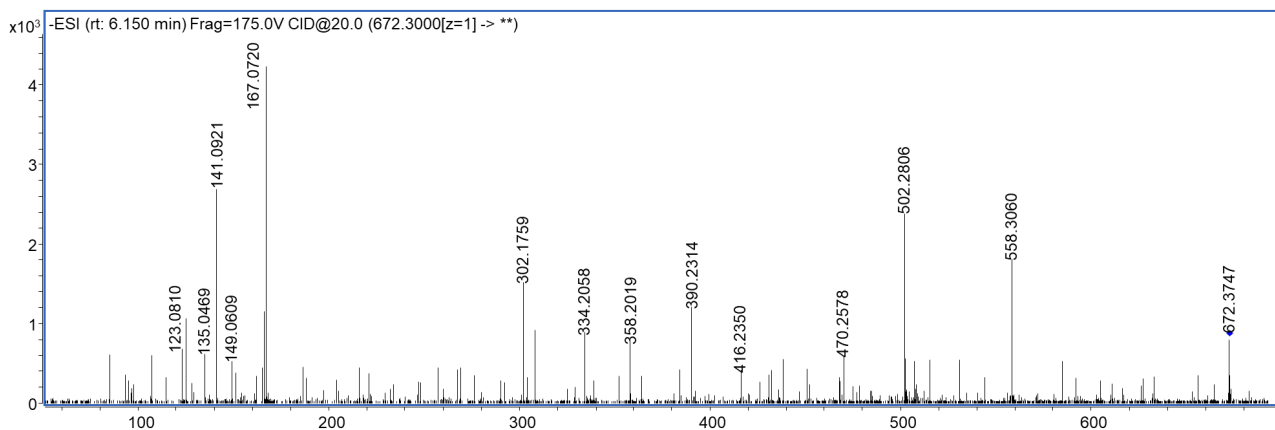



**Supplementary Fig. 22.** Proposed MS/MS fragmentation pathway of cattlemycin E (**1e**,  $m/z$  676).

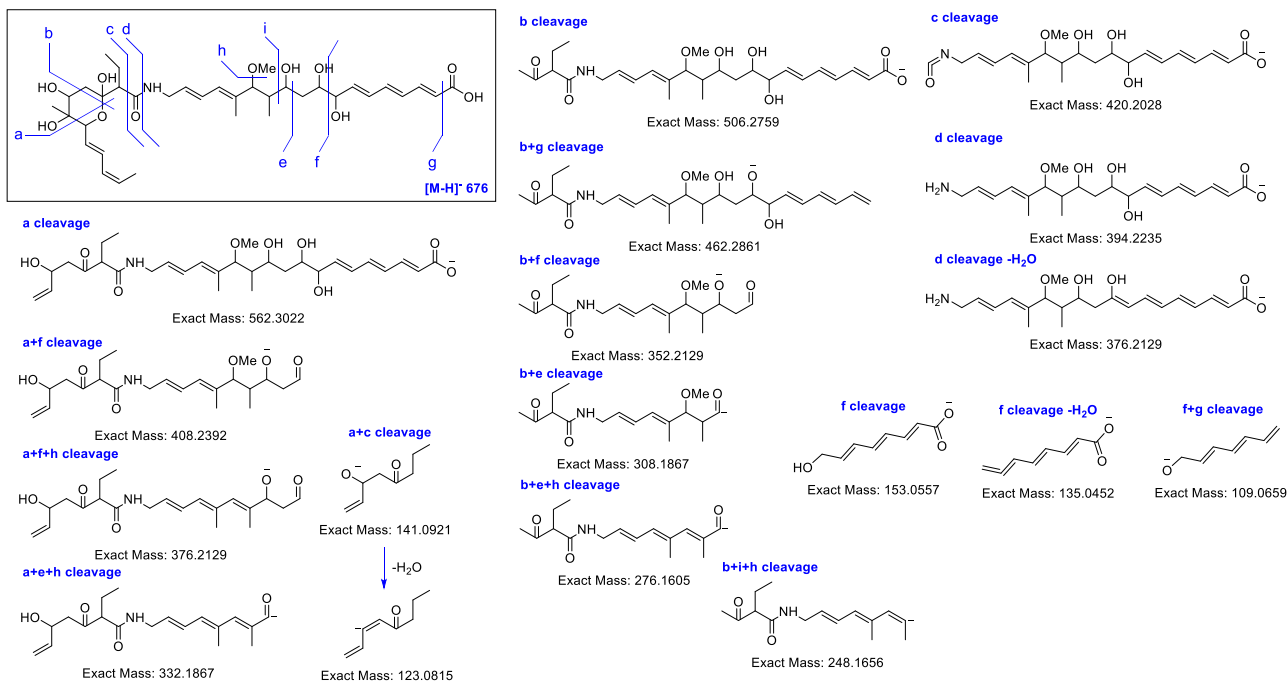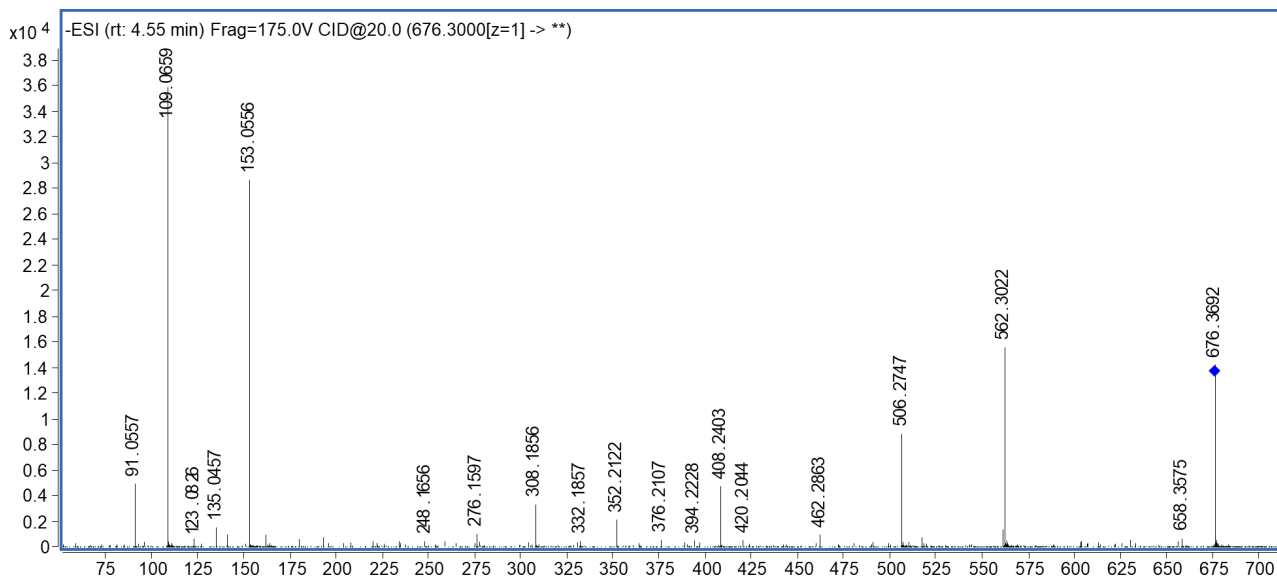

**Supplementary Fig. 23.** Proposed MS/MS fragmentation pathway of cattlemycin F (**1f**,  $m/z$  674).

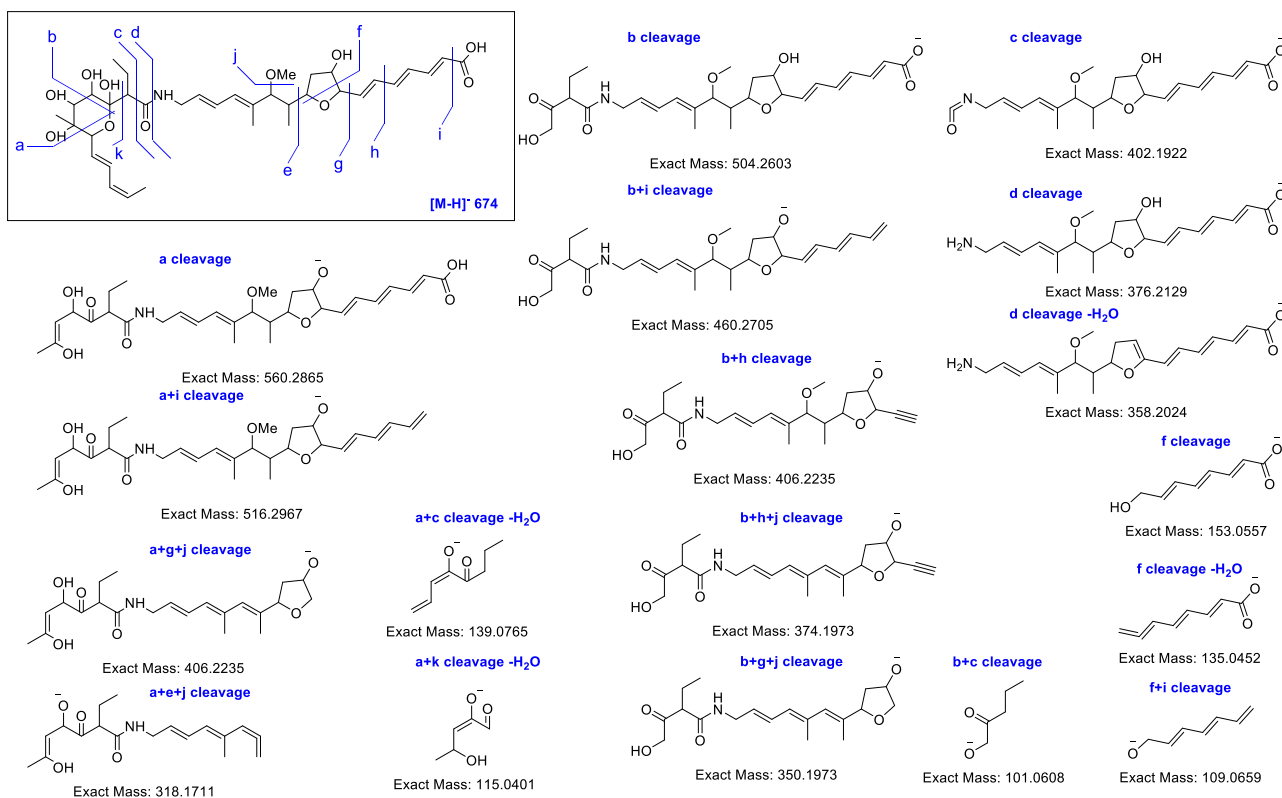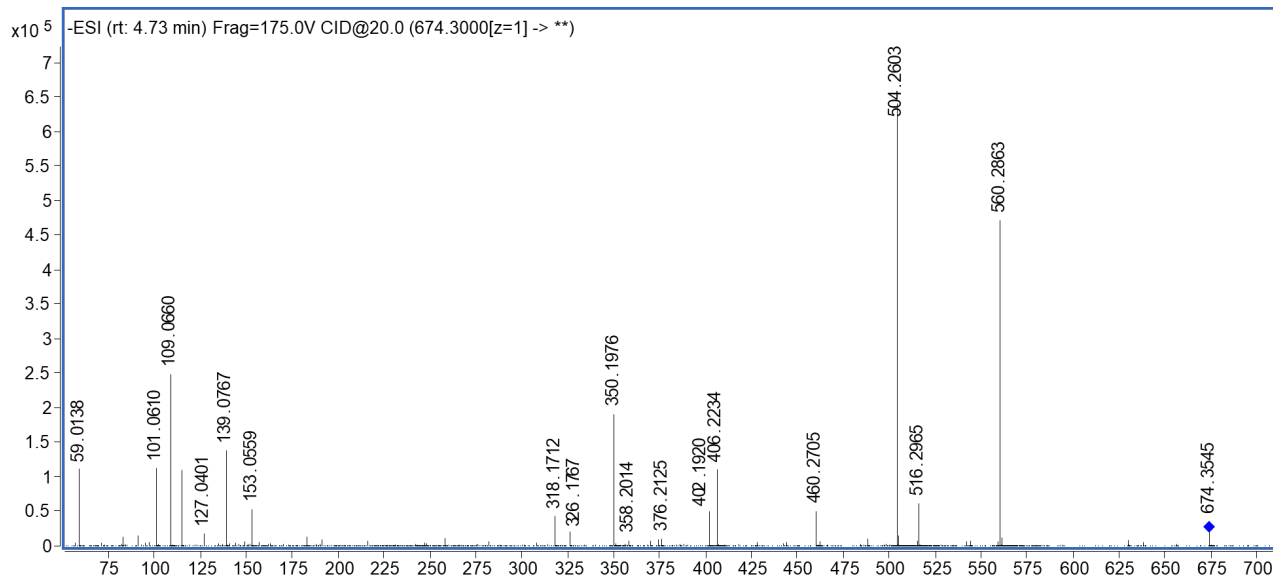

**Supplementary Fig. 24.** Proposed MS/MS fragmentation pathway of cattlemycin G (**1g**,  $m/z$  692).

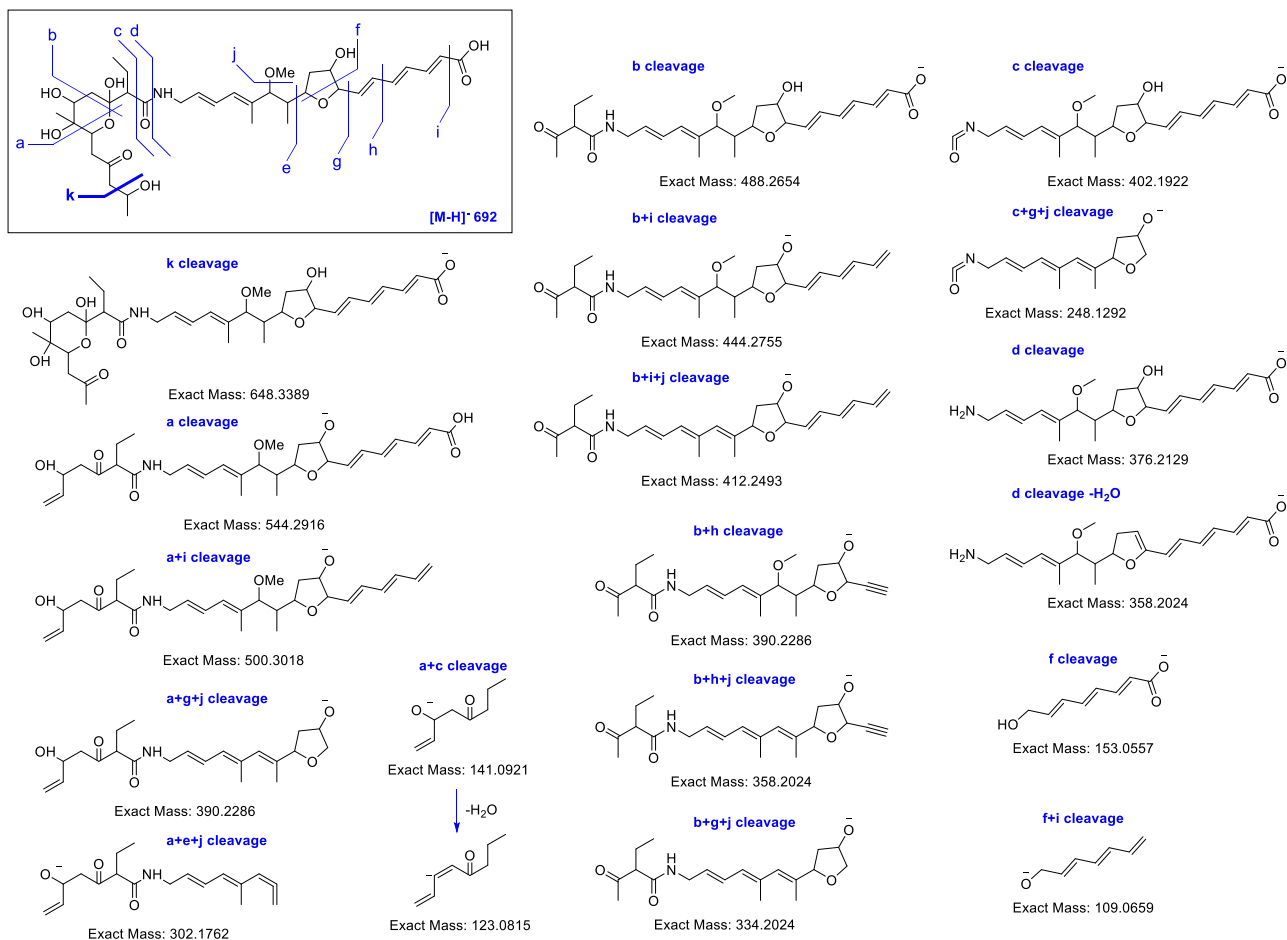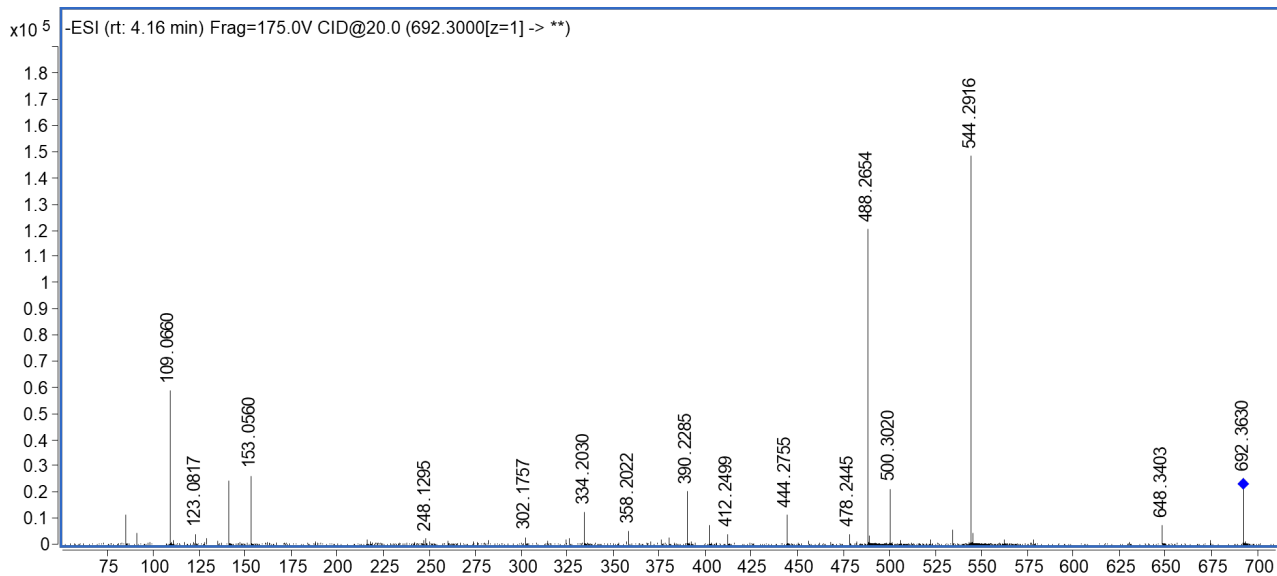

**Supplementary Fig. 25.** Proposed MS/MS fragmentation pathway of cattlemycin H (**1h**,  $m/z$  614).

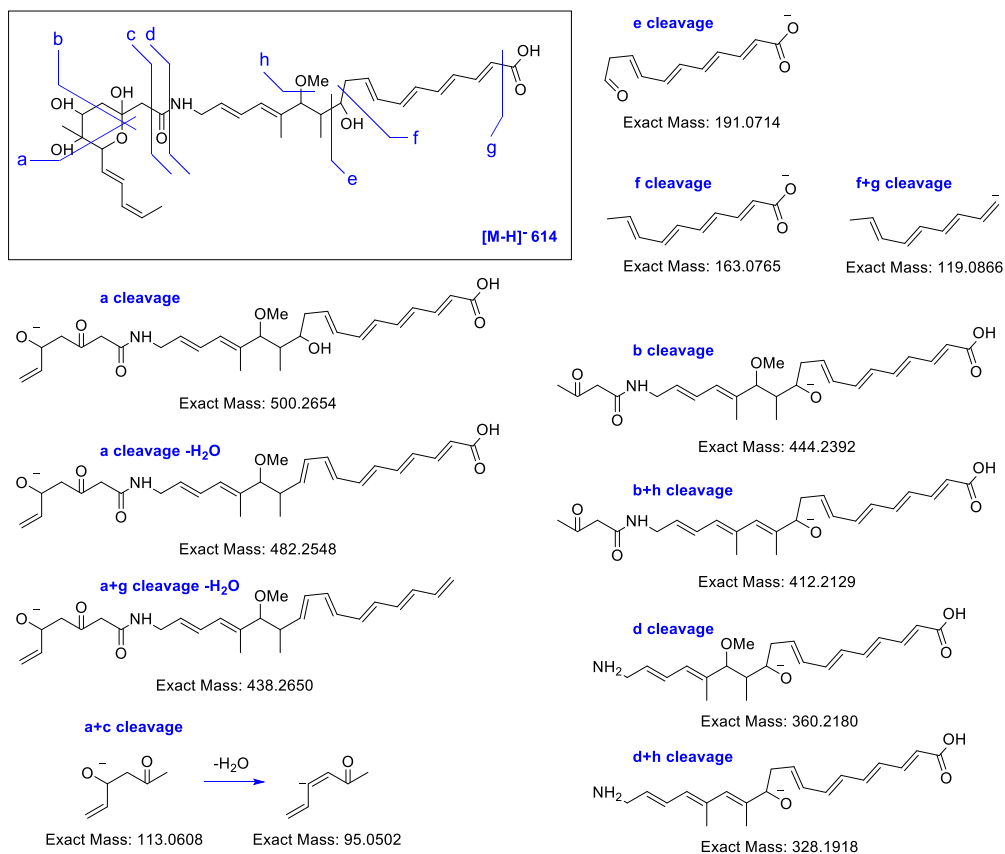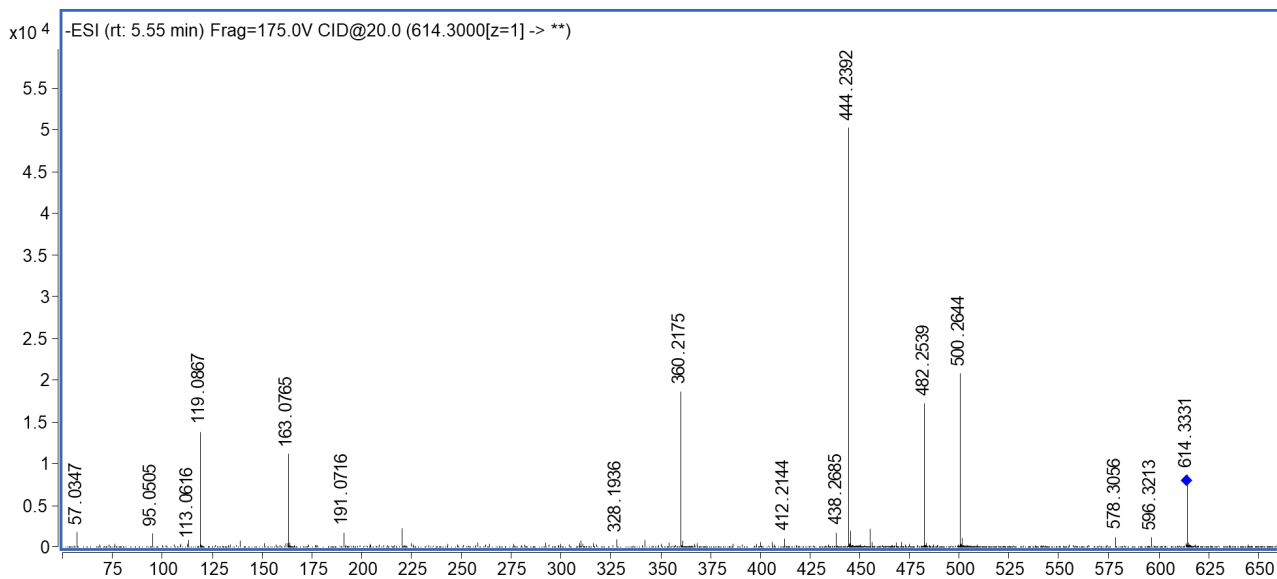

**Supplementary Fig. 26.** Proposed MS/MS fragmentation pathway of cattlemycin I (**1i**,  $m/z$  628).

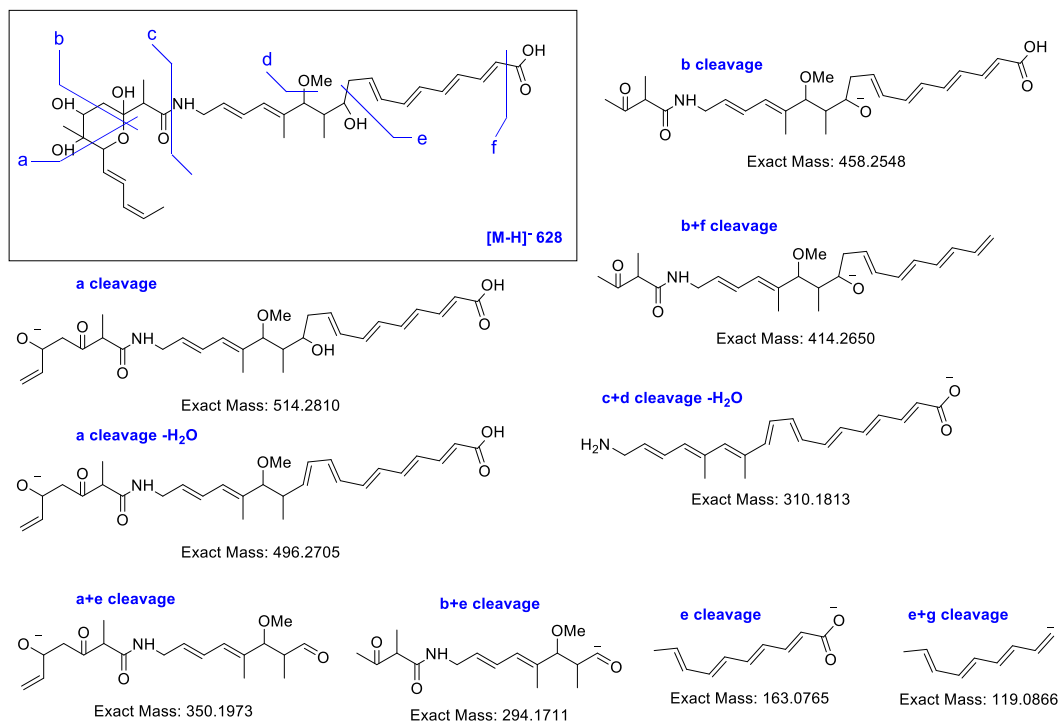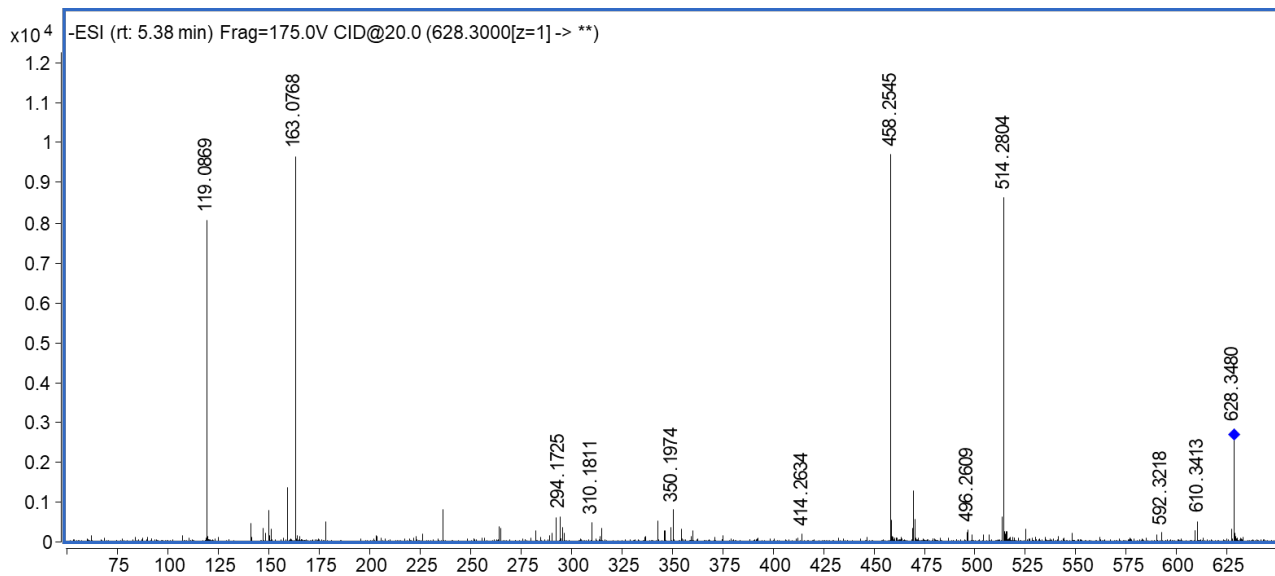

Supplementary Fig. 27. Proposed MS/MS fragmentation pathway of cattlemycin J (**1j**,  $m/z$  642).

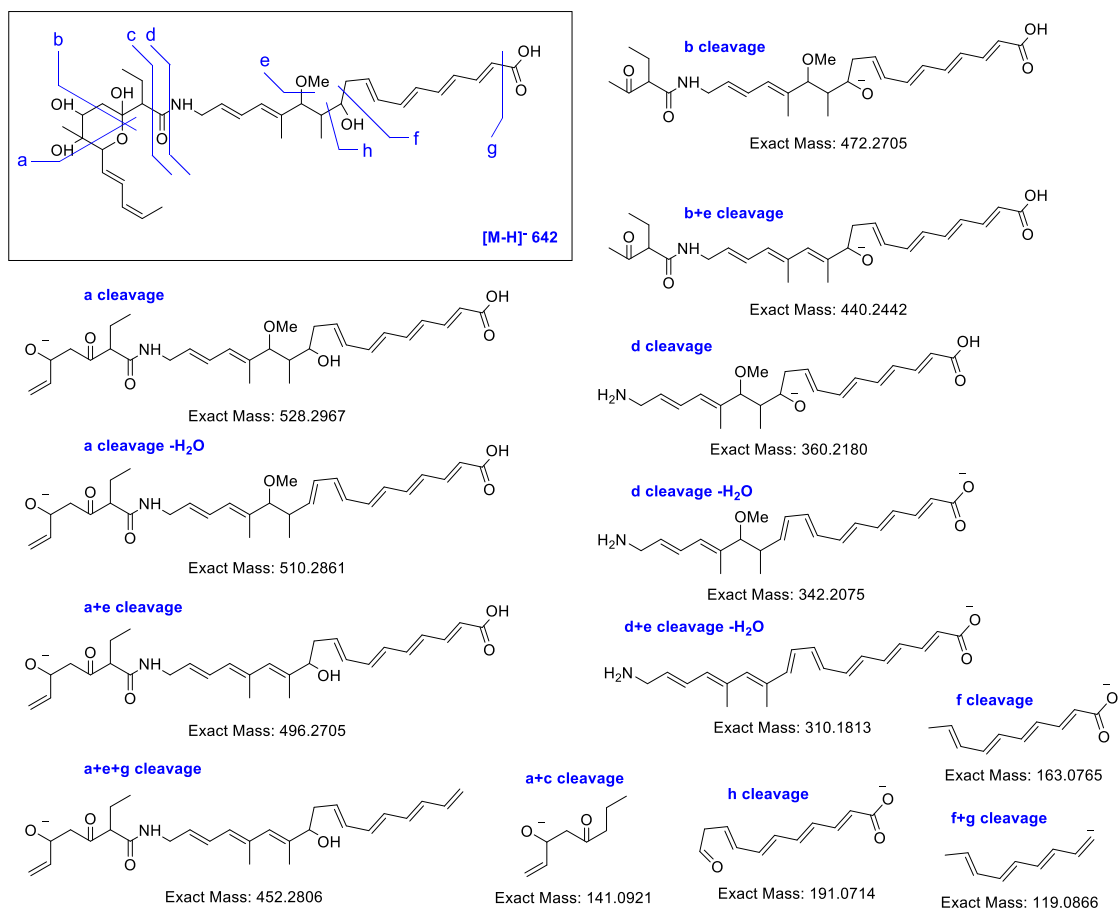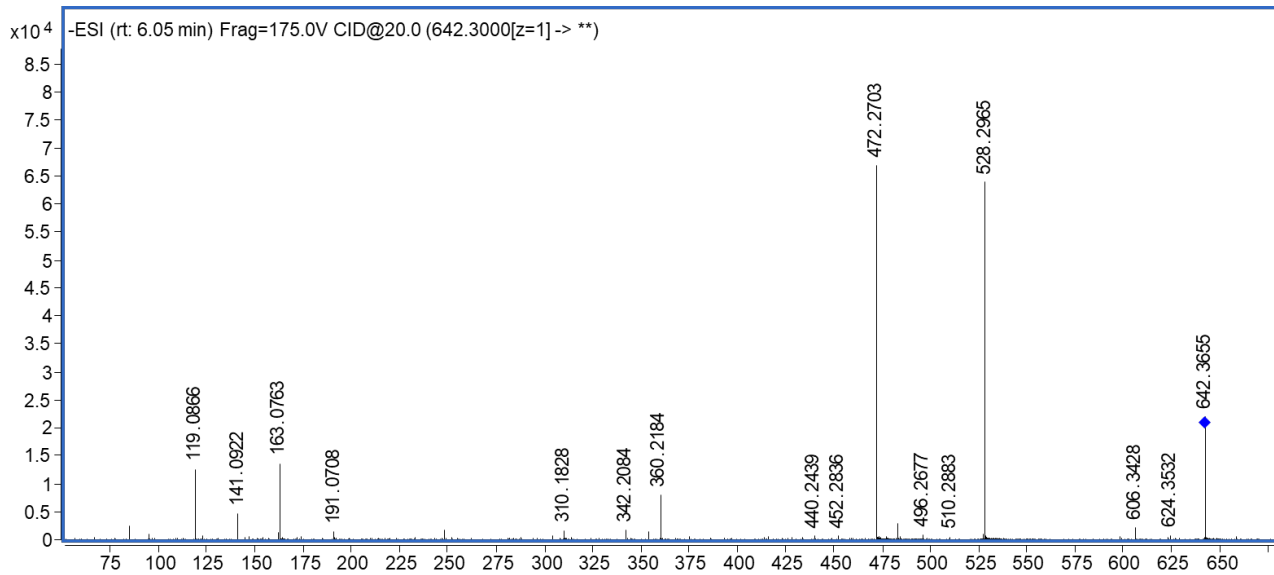

**Supplementary Fig. 28.** Proposed MS/MS fragmentation pathway of cattlemycin K (**1k**,  $m/z$  612).

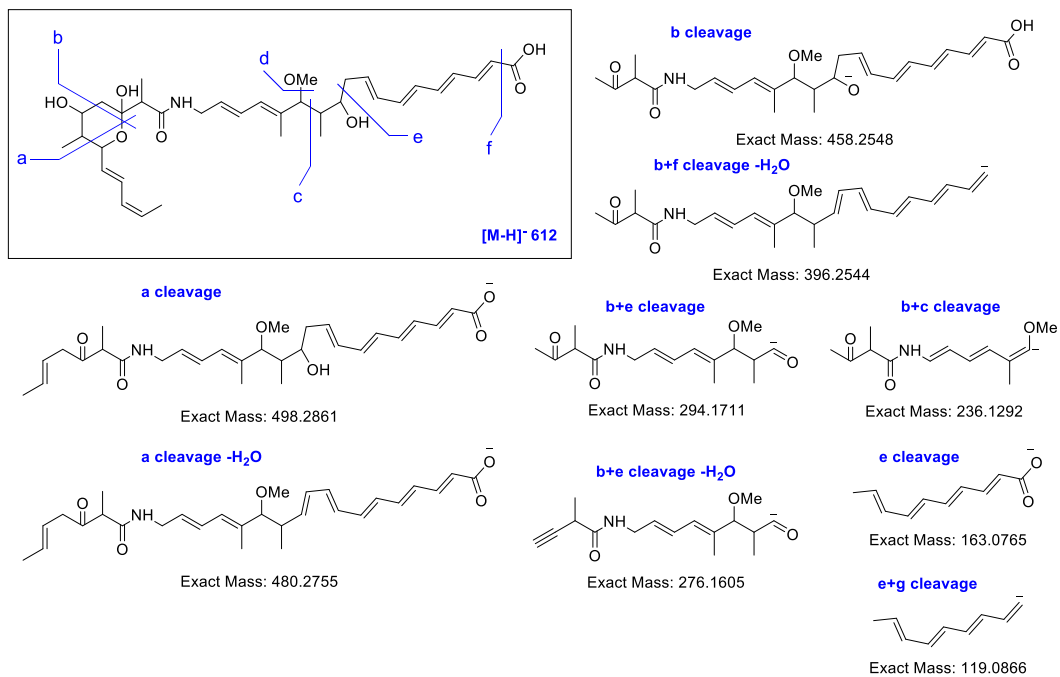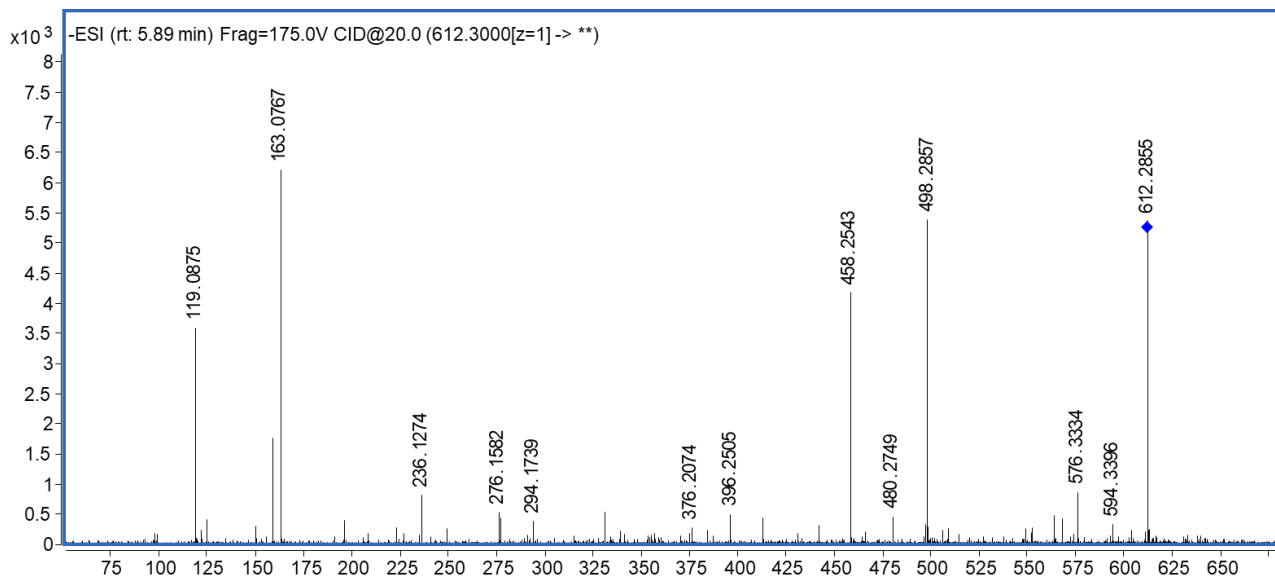

**Supplementary Fig. 29.** Proposed MS/MS fragmentation pathway of cattlemycin L (**11**,  $m/z$  642).

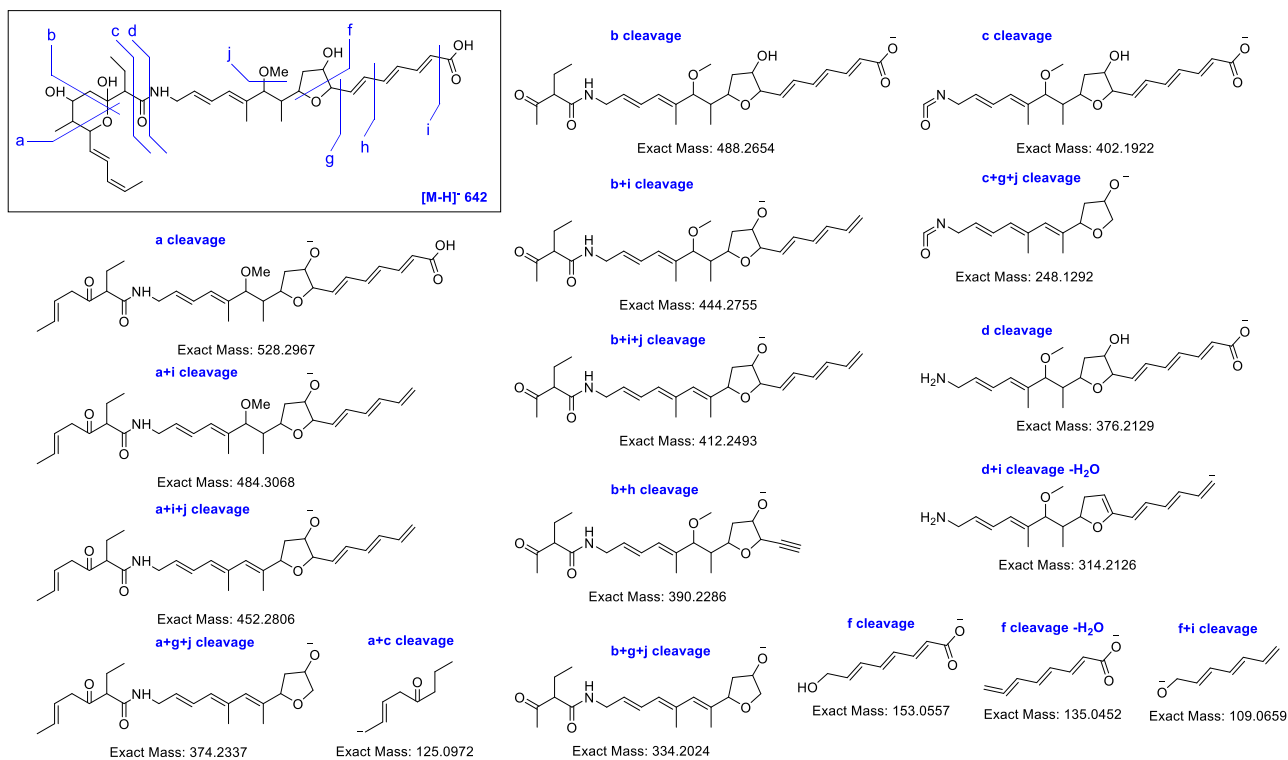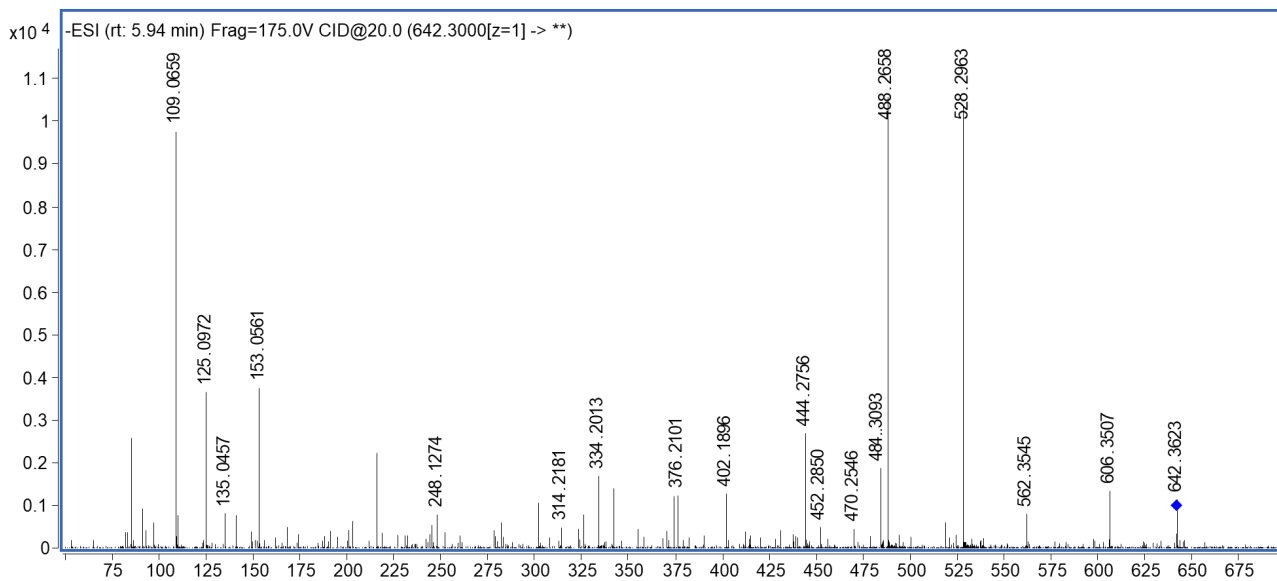



**Supplementary Fig. 30.** Proposed MS/MS fragmentation pathway of cattlemycin M (**1m**,  $m/z$  640).

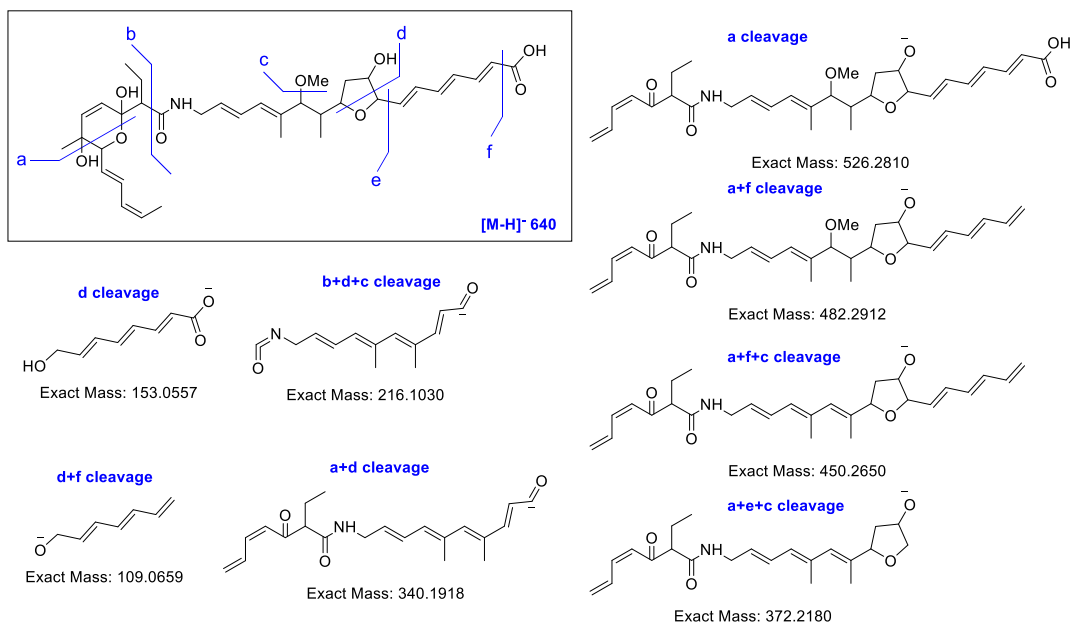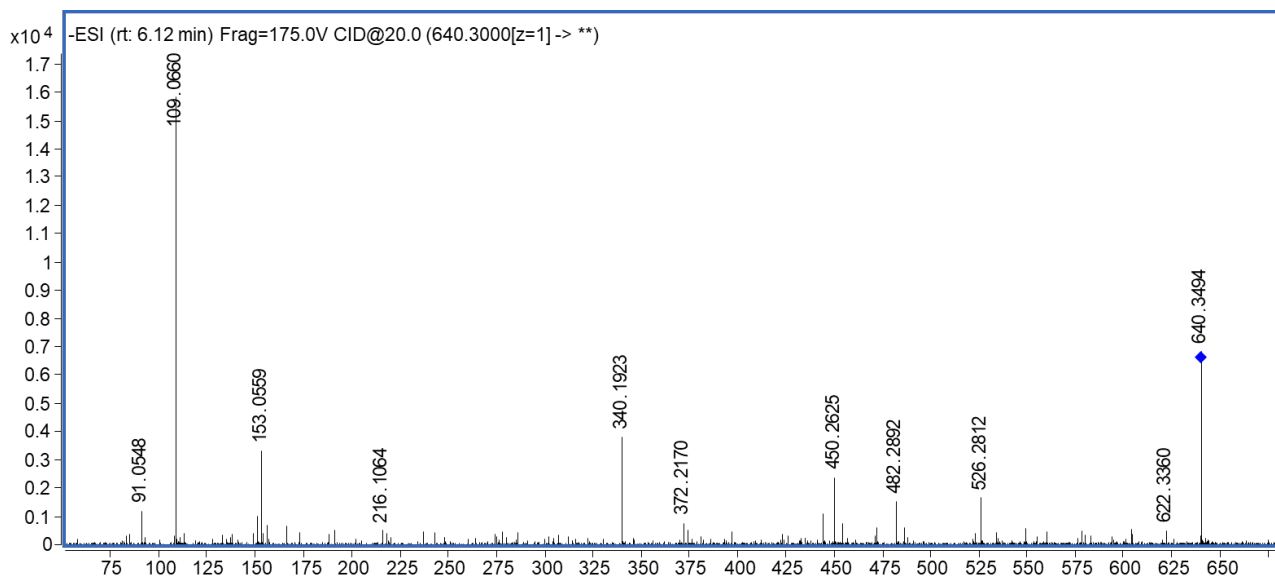

**Supplementary Fig. 31.** Proposed MS/MS fragmentation pathway of butyrolactol A (**2a**) and its isomer (**2f**).

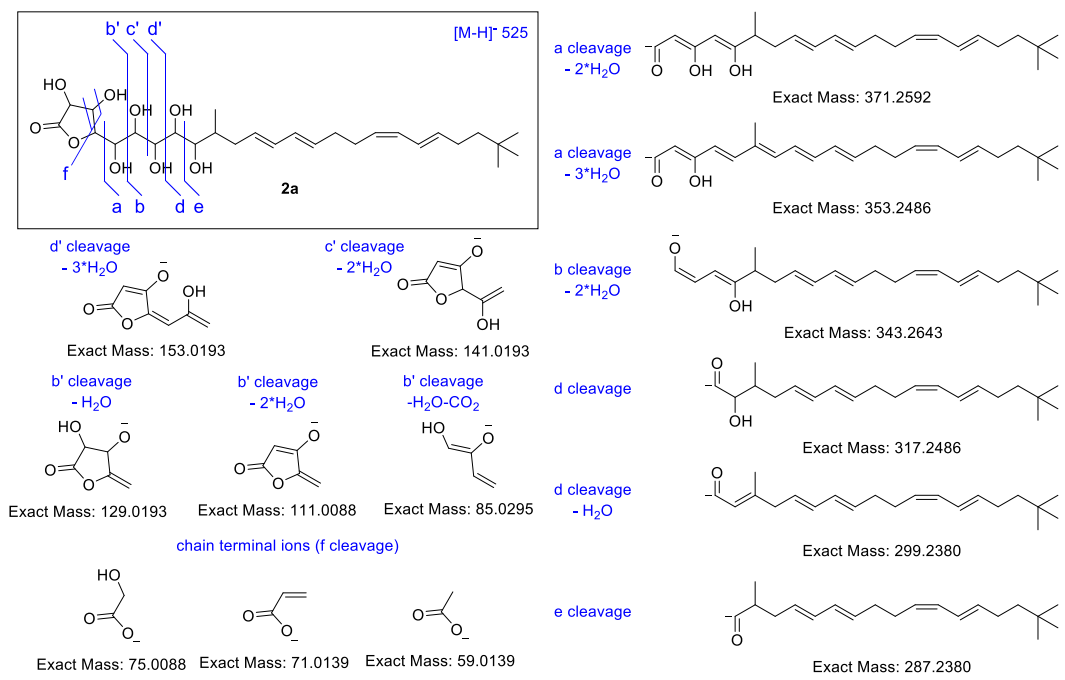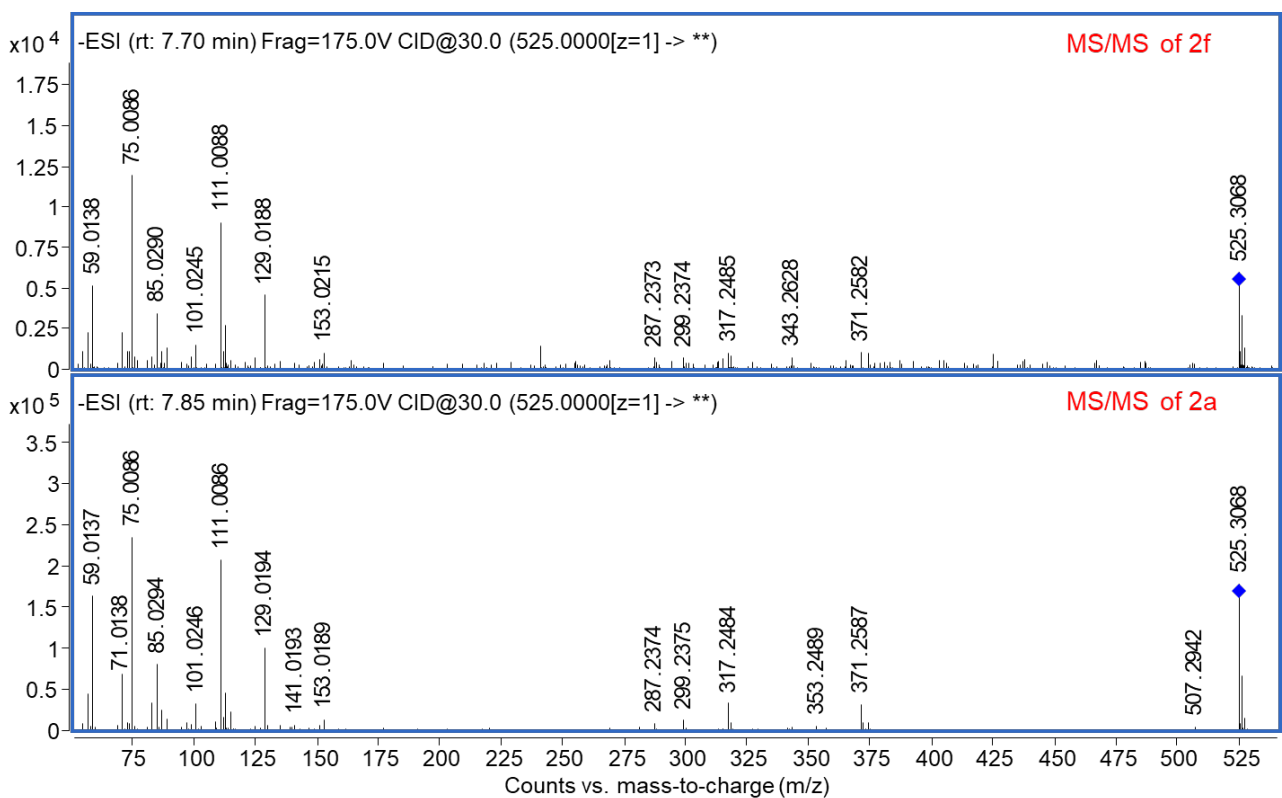

**Supplementary Fig. 32.** Proposed MS/MS fragmentation pathway of butyrolactol B (**2b**) and its isomer (**2g**).

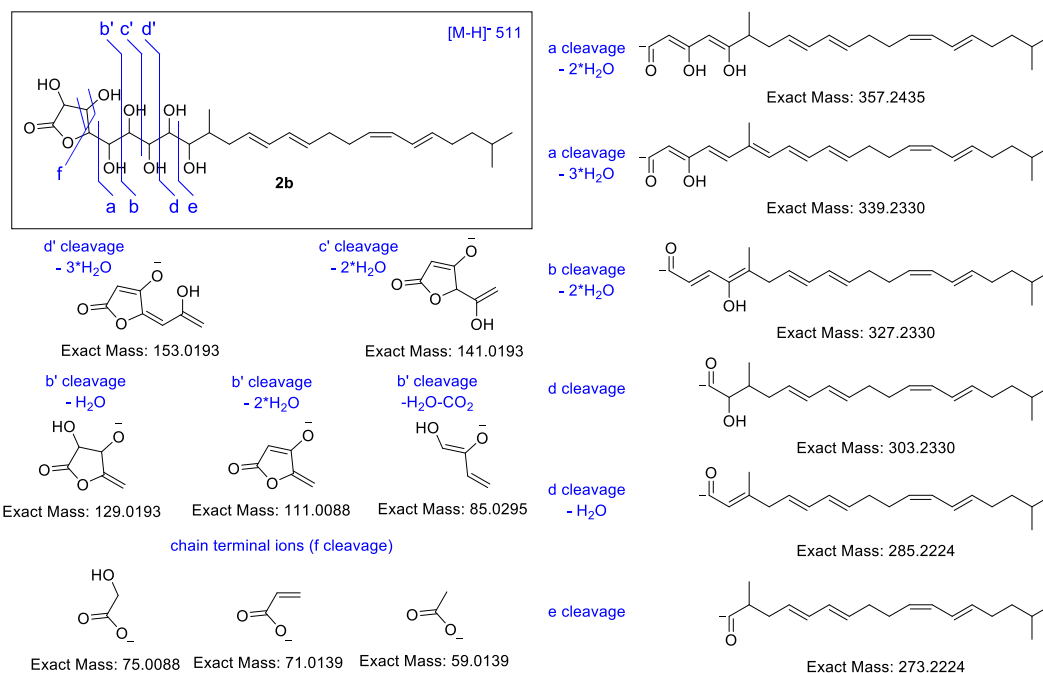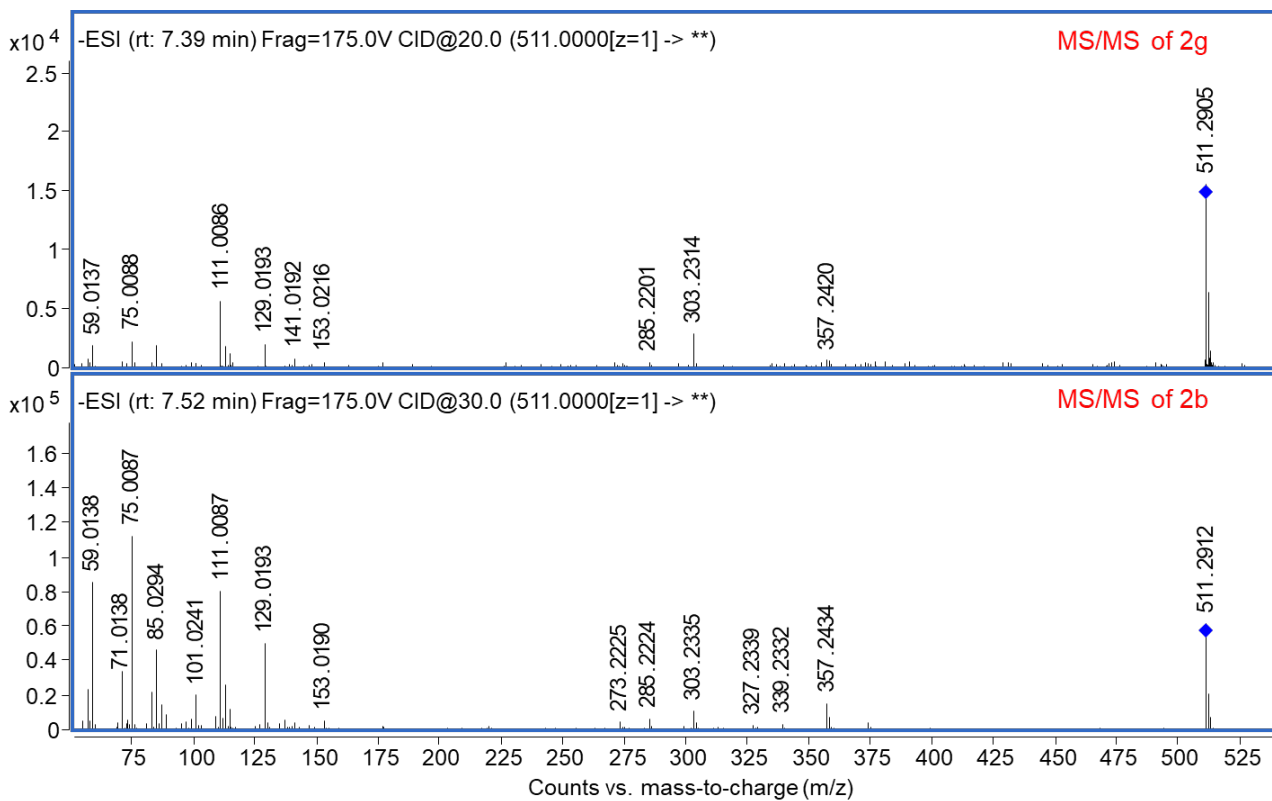

**Supplementary Fig. 33.** Proposed MS/MS fragmentation pathway of butyrolactol A2 (**2c**).

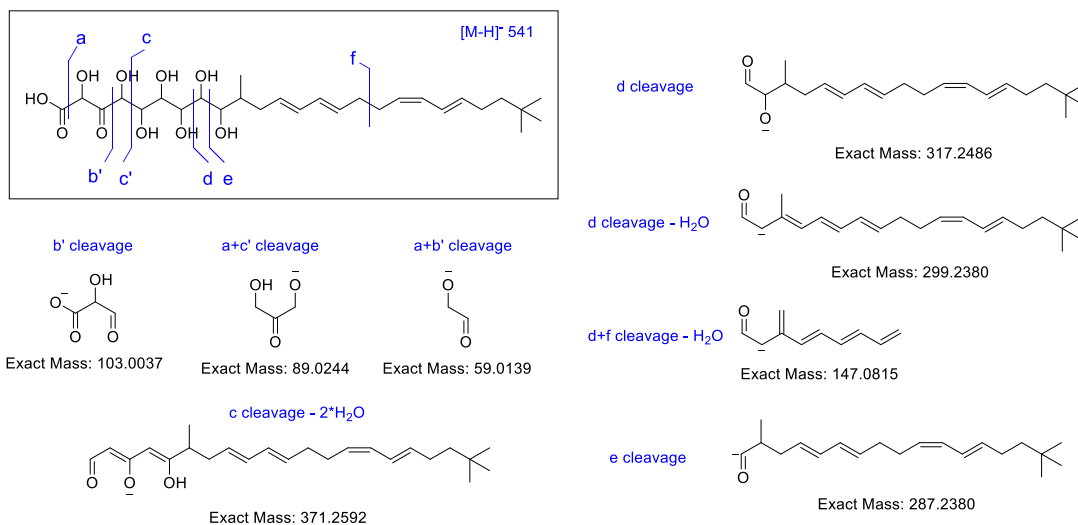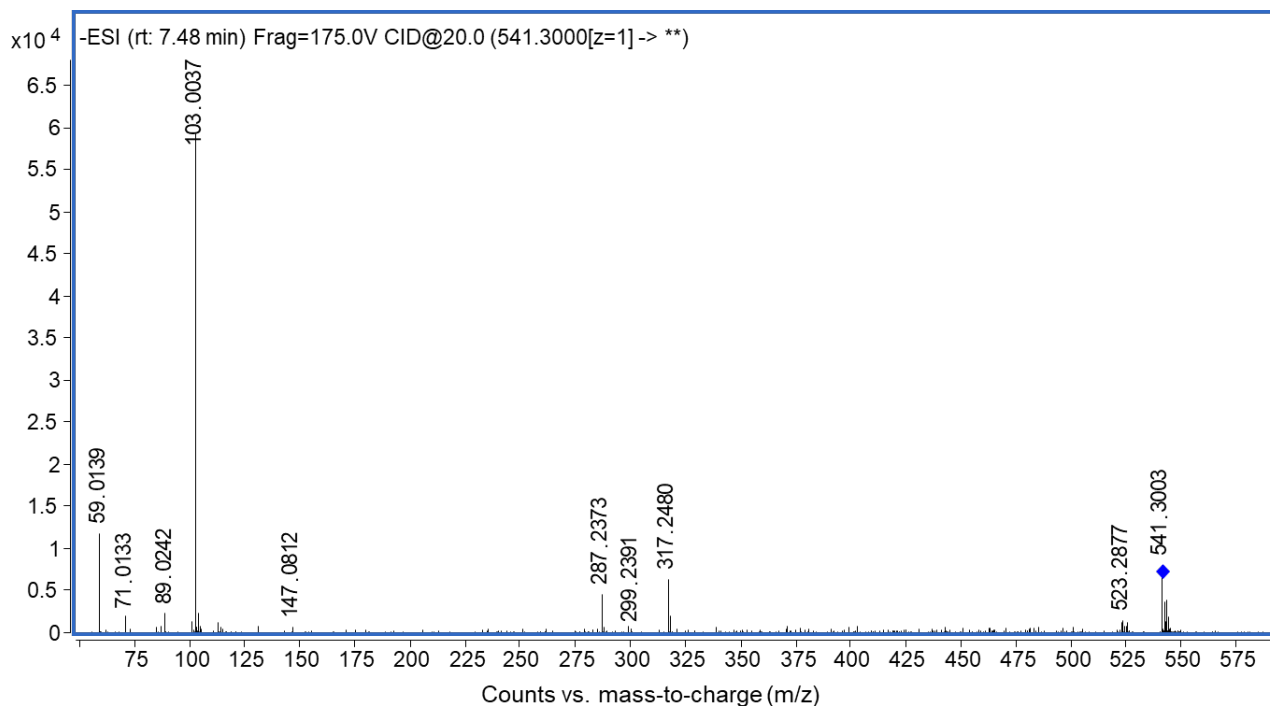

**Supplementary Fig. 34.** Proposed MS/MS fragmentation pathway of butyrolactol B2 (**2d**).

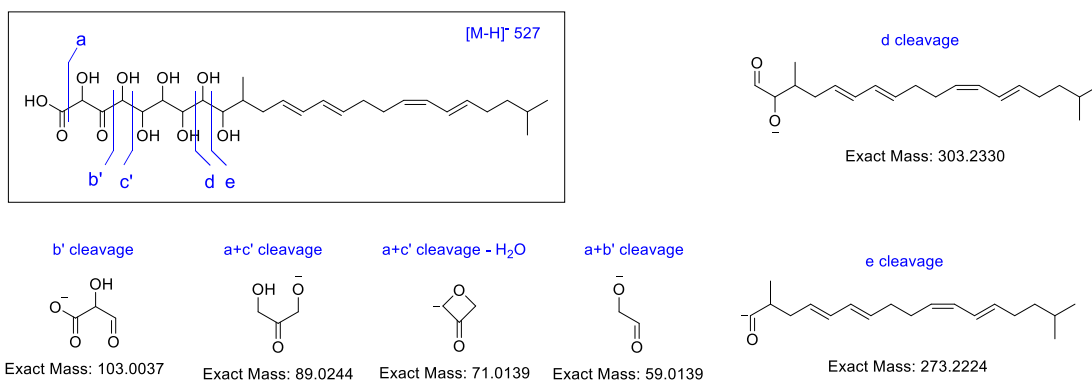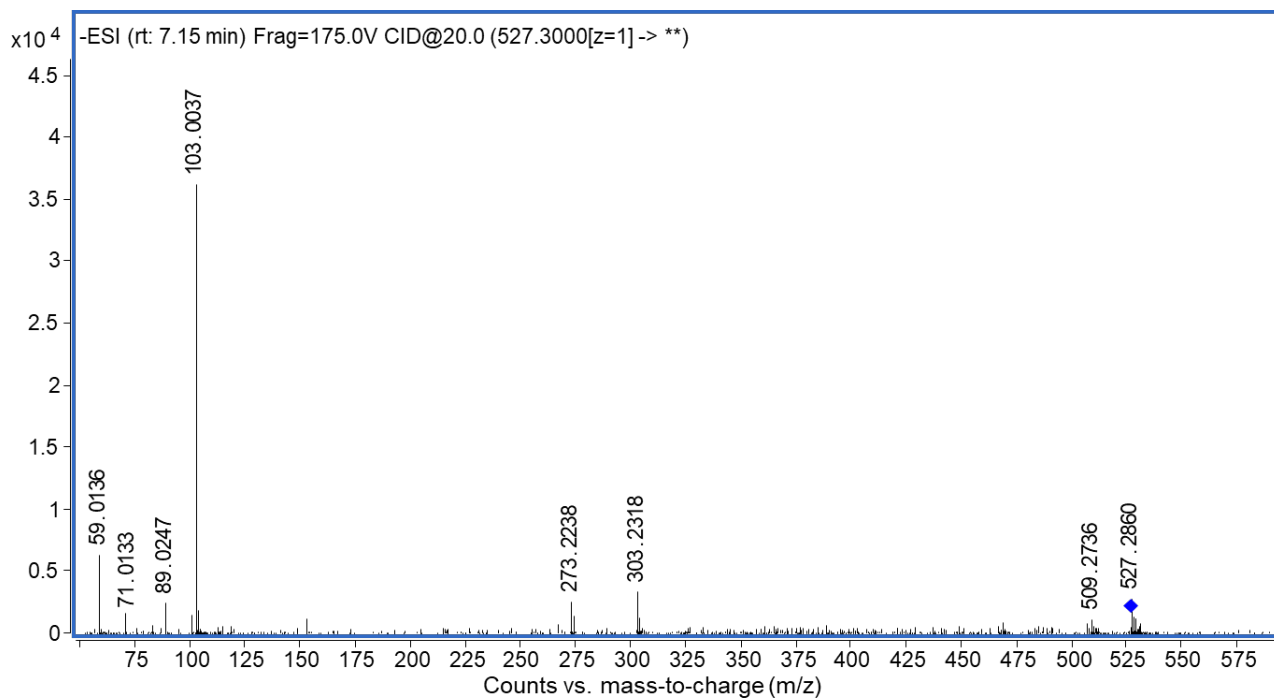

**Supplementary Fig. 35.** Proposed MS/MS fragmentation pathway of butyrolactol C (**2e**).

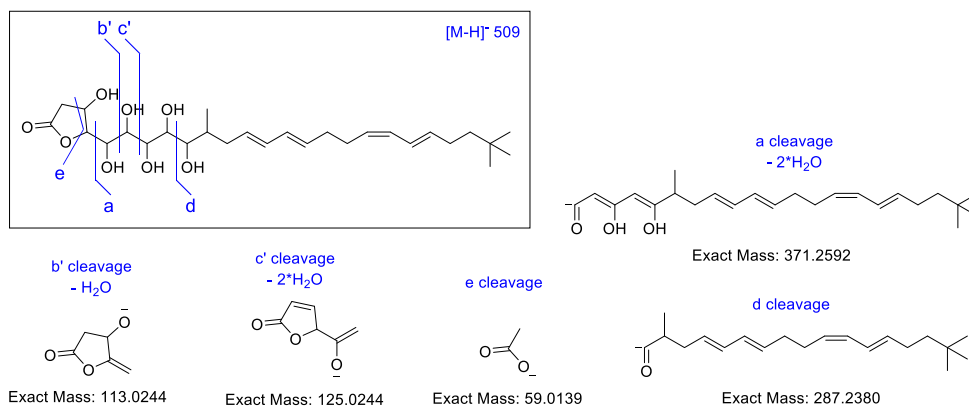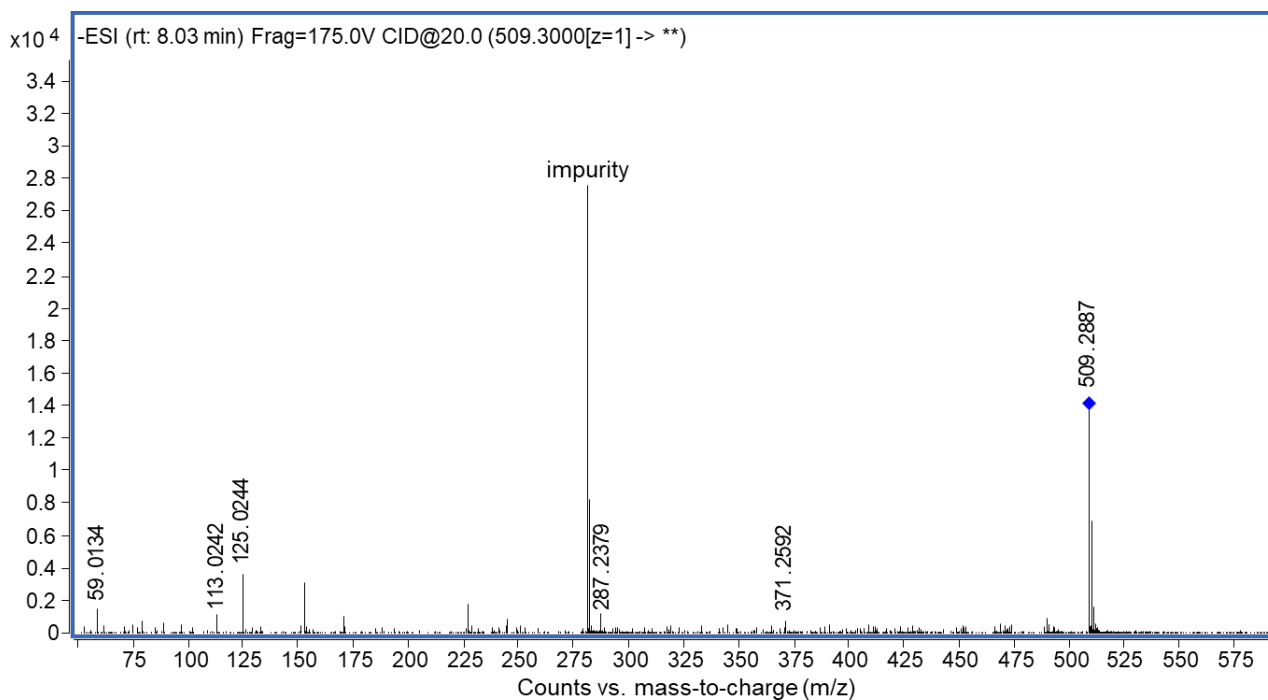

Supplementary Fig. 36. Proposed MS/MS fragmentation pathway of cattleyatetronate A (3a).

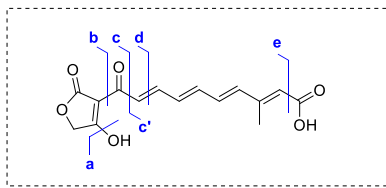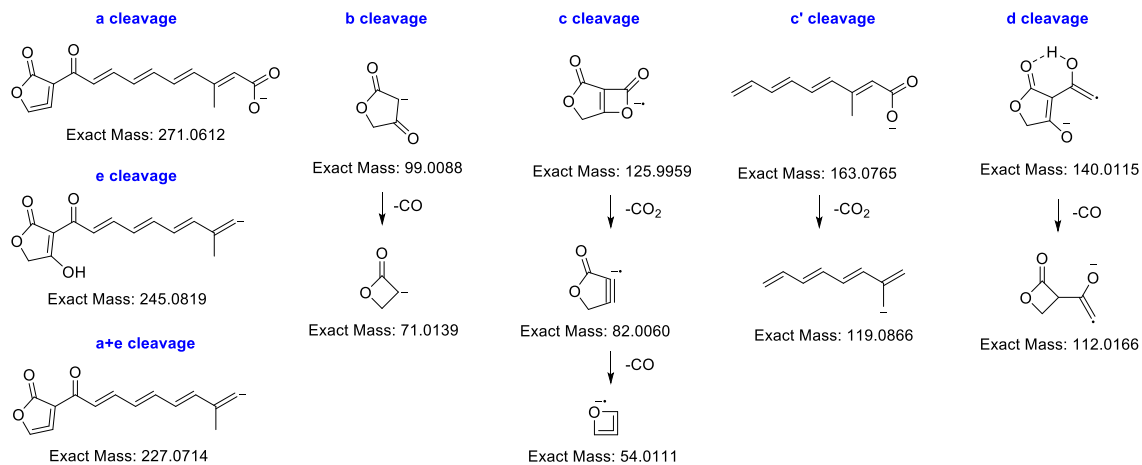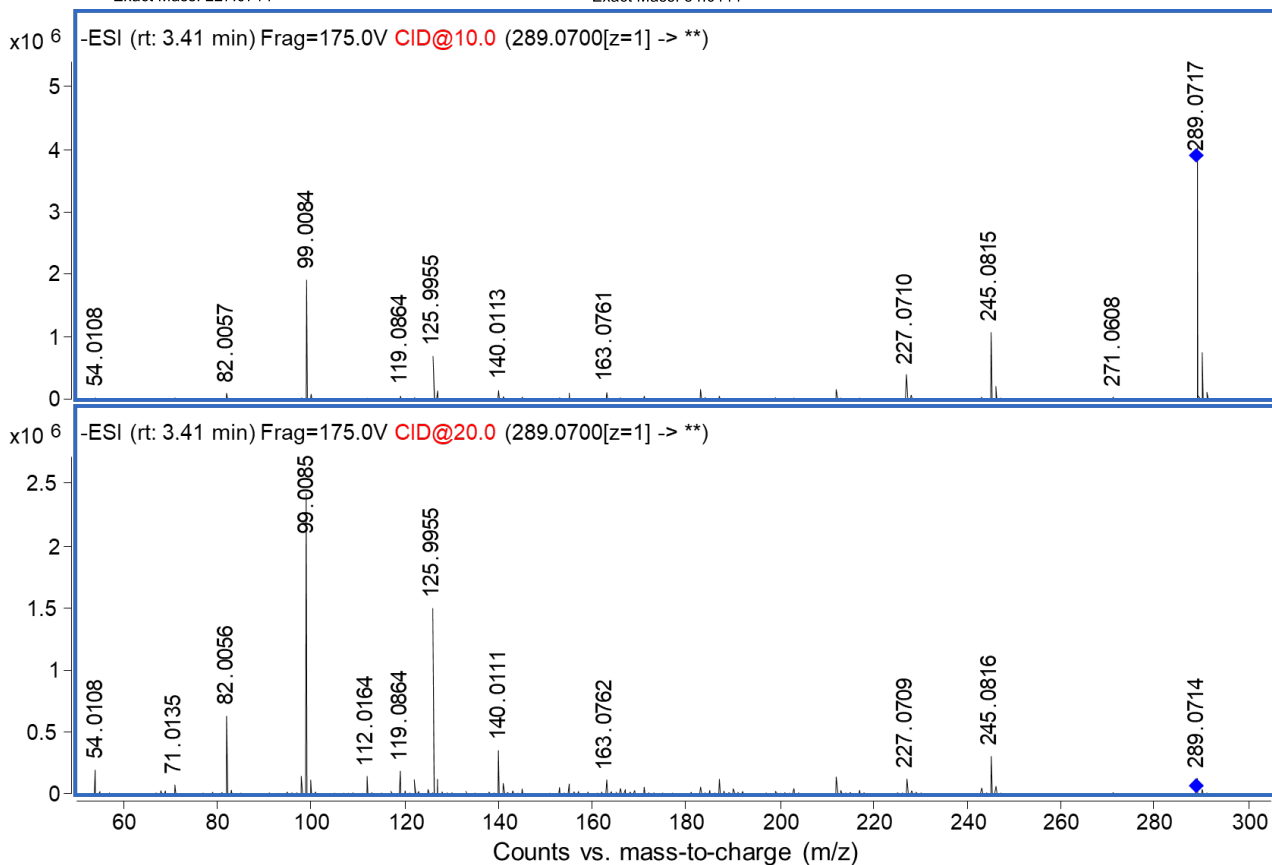

**Supplementary Fig. 37.** Proposed MS/MS fragmentation pathway of cattleyatetronate B (**3b**).

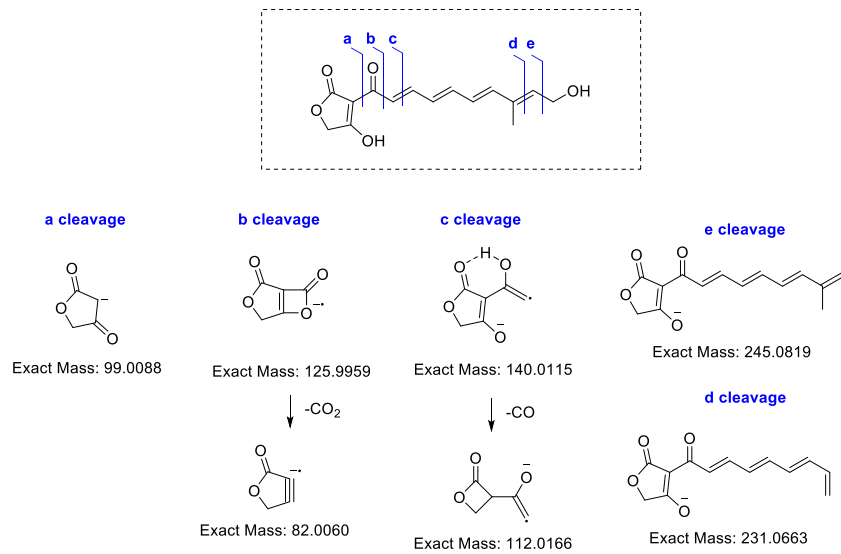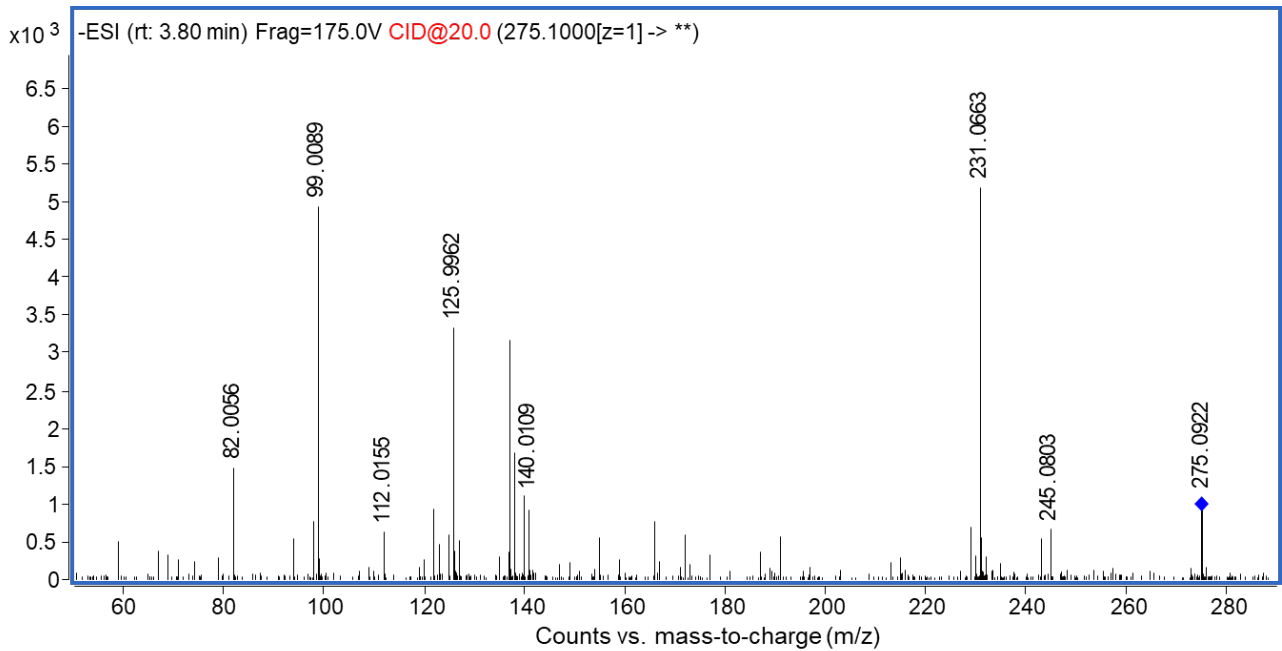



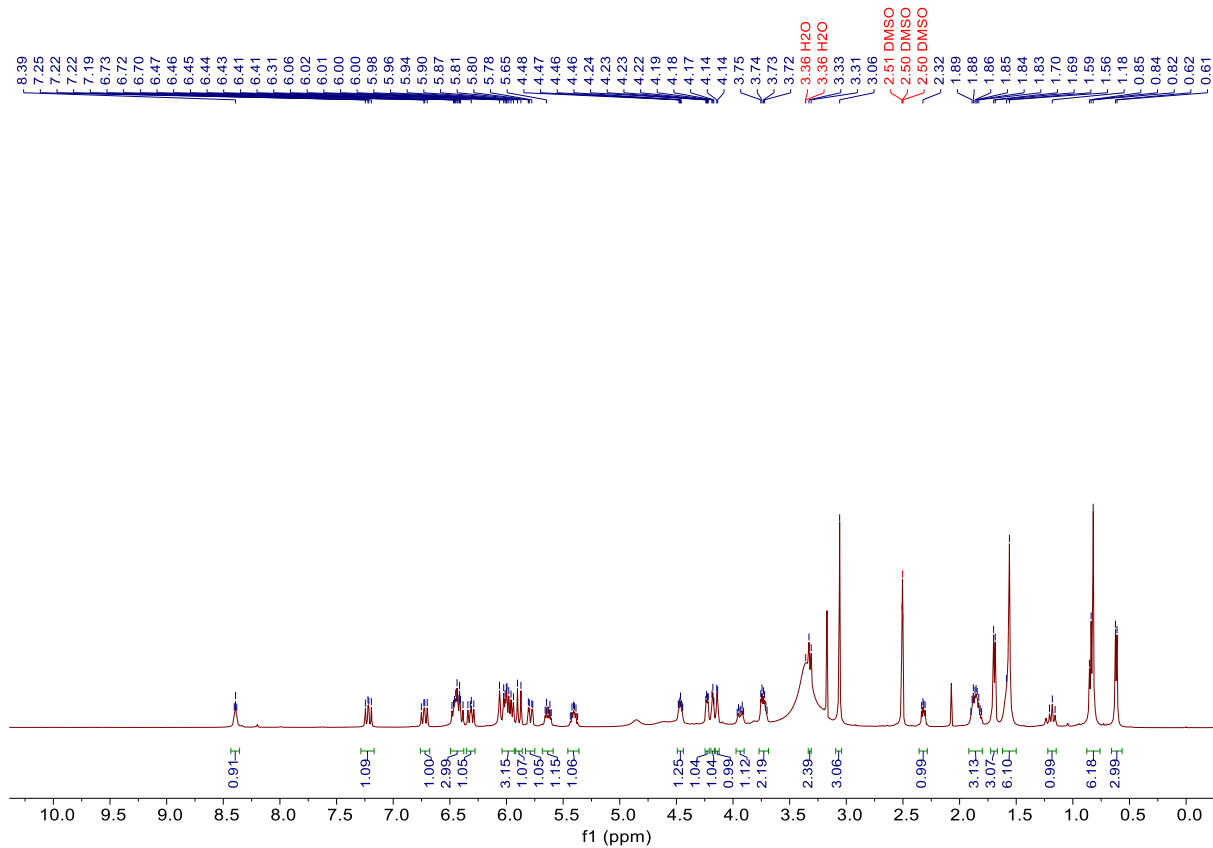

Supplementary Fig. 38. <sup>1</sup>H NMR spectrum (500 MHz, DMSO-*d*<sub>6</sub>) of cattlemycin A (**1a**).

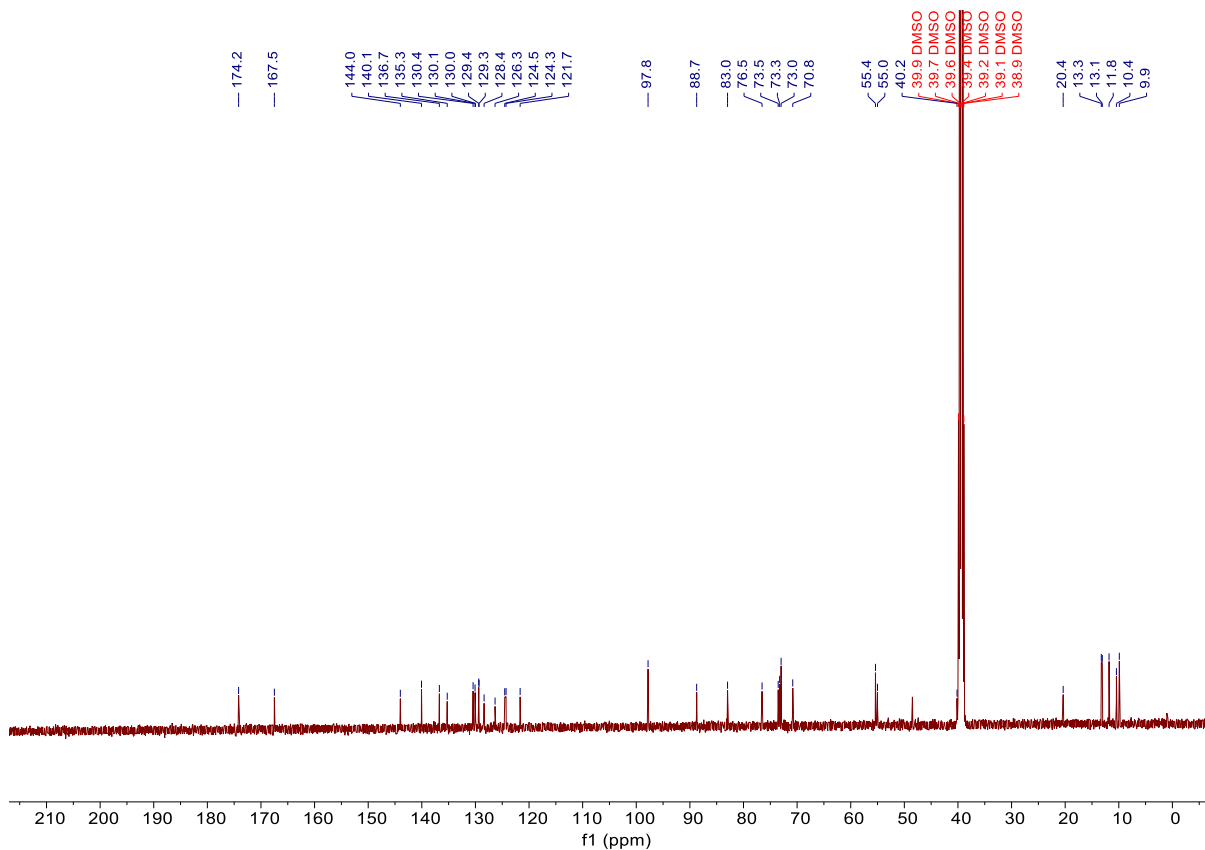

Supplementary Fig. 39. <sup>13</sup>C NMR spectrum (125 MHz, DMSO-*d*<sub>6</sub>) of cattlemycin A (**1a**).

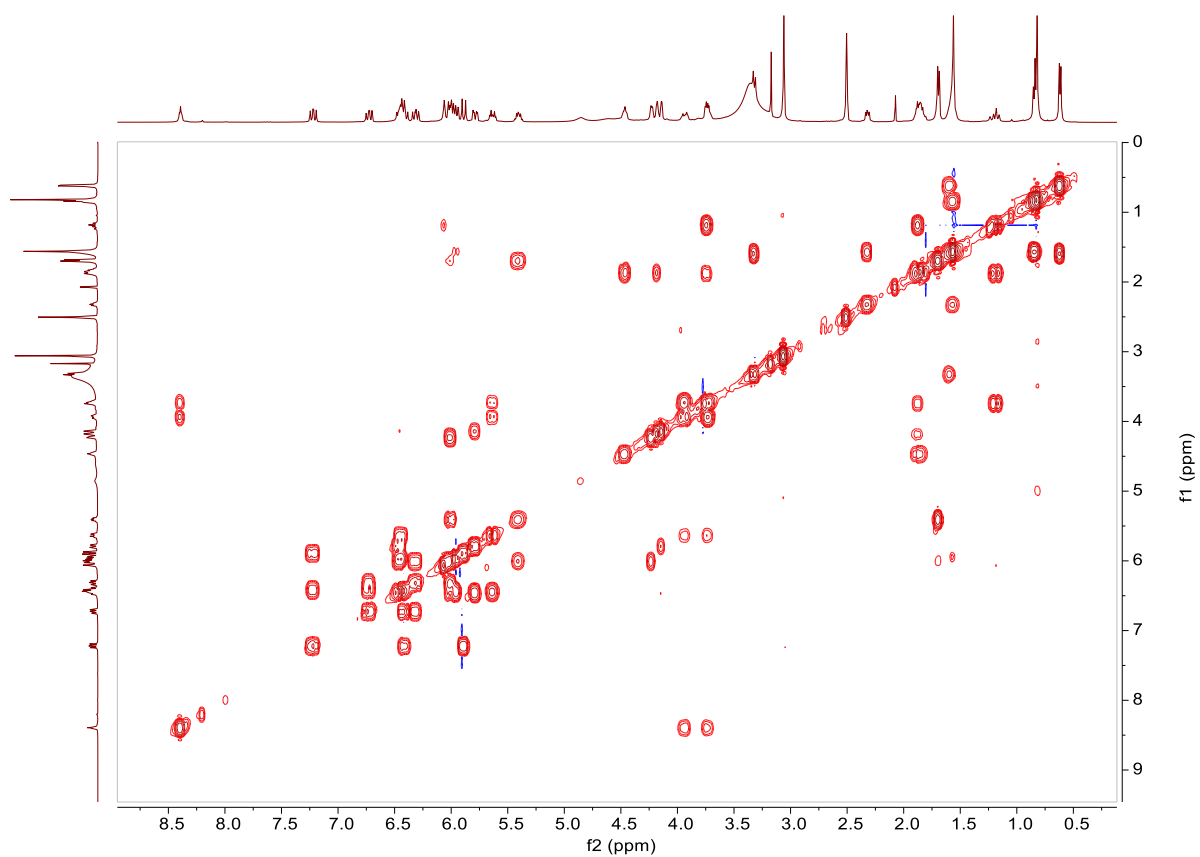

**Supplementary Fig. 40.**  $^1\text{H}, ^1\text{H}$ -COSY spectrum (500 MHz,  $\text{DMSO-}d_6$ ) of cattlemycin A (1a).

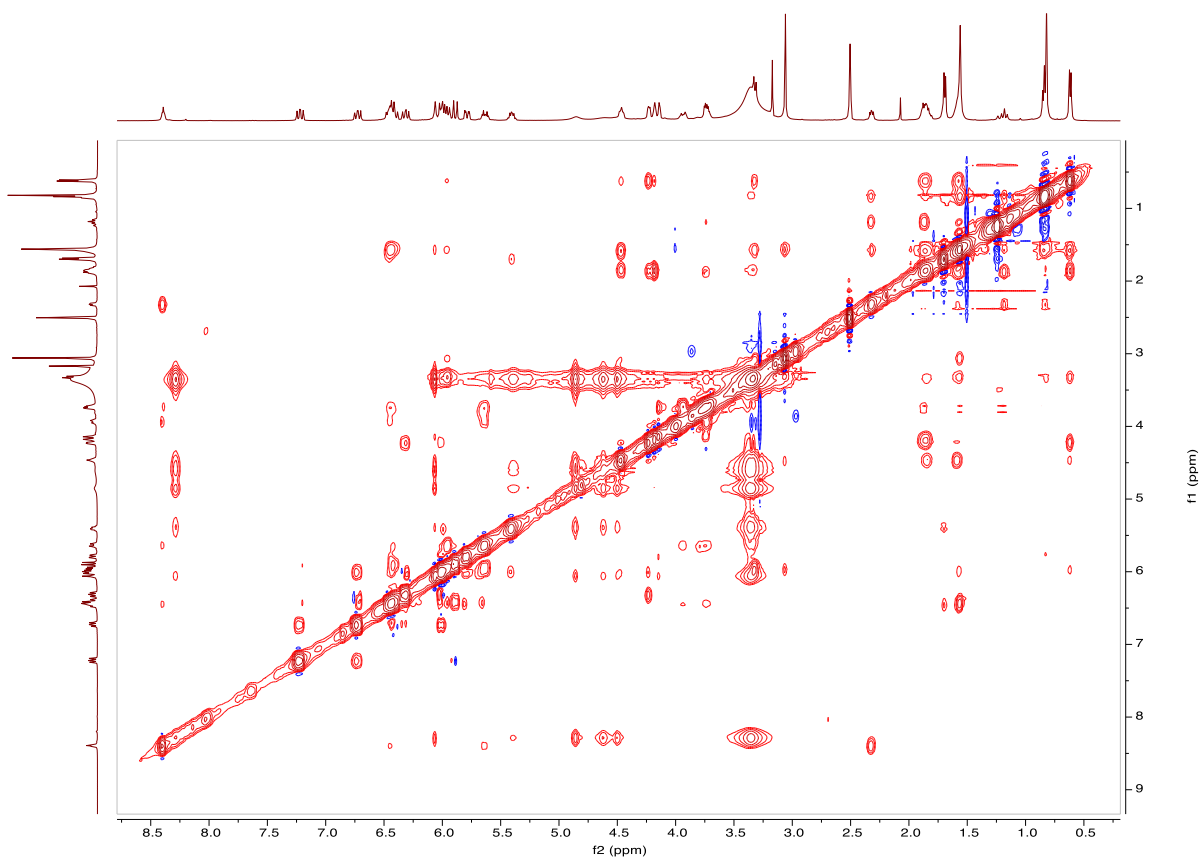

**Supplementary Fig. 41.**  $^1\text{H}, ^1\text{H}$ -NOESY spectrum (500 MHz,  $\text{DMSO-}d_6$ ) of cattlemycin A (1a).

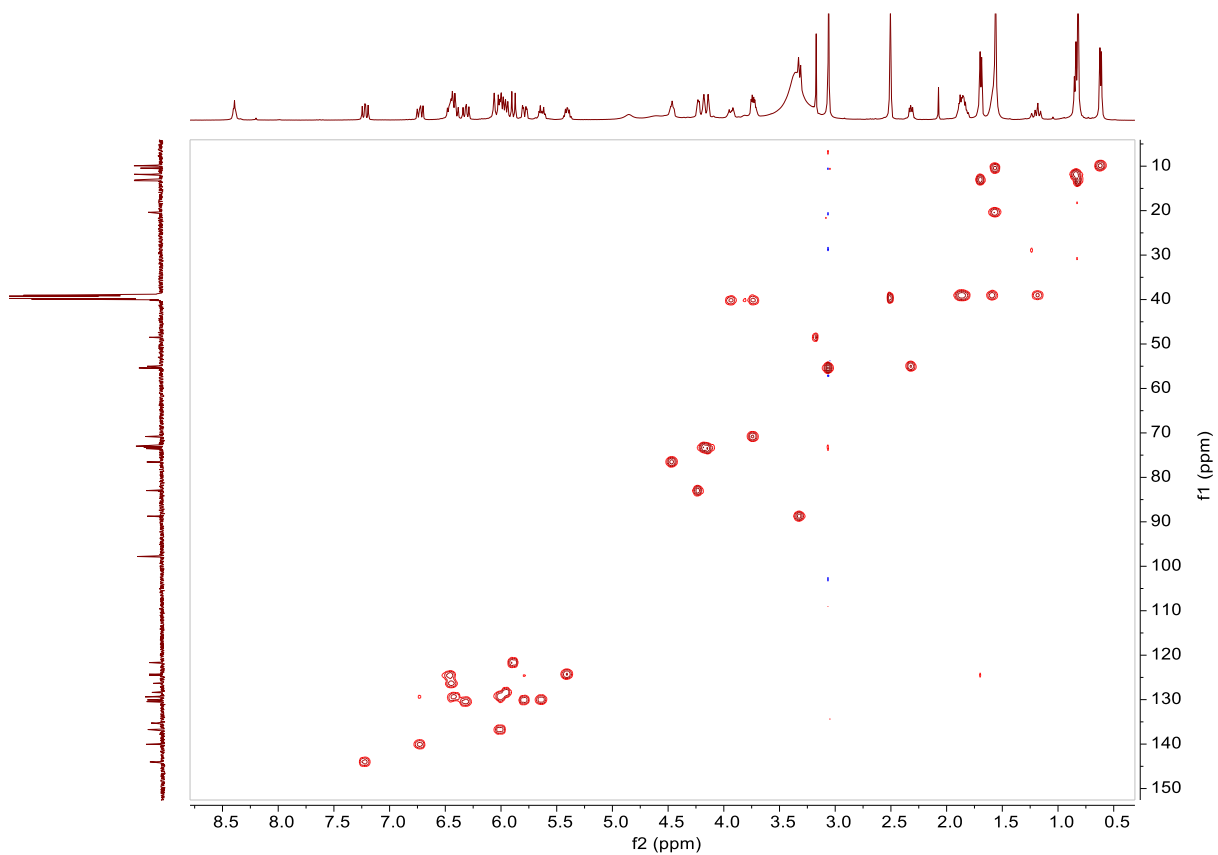

**Supplementary Fig. 42.** HSQC spectrum (500 MHz, DMSO-*d*<sub>6</sub>) of cattlemycin A (**1a**).

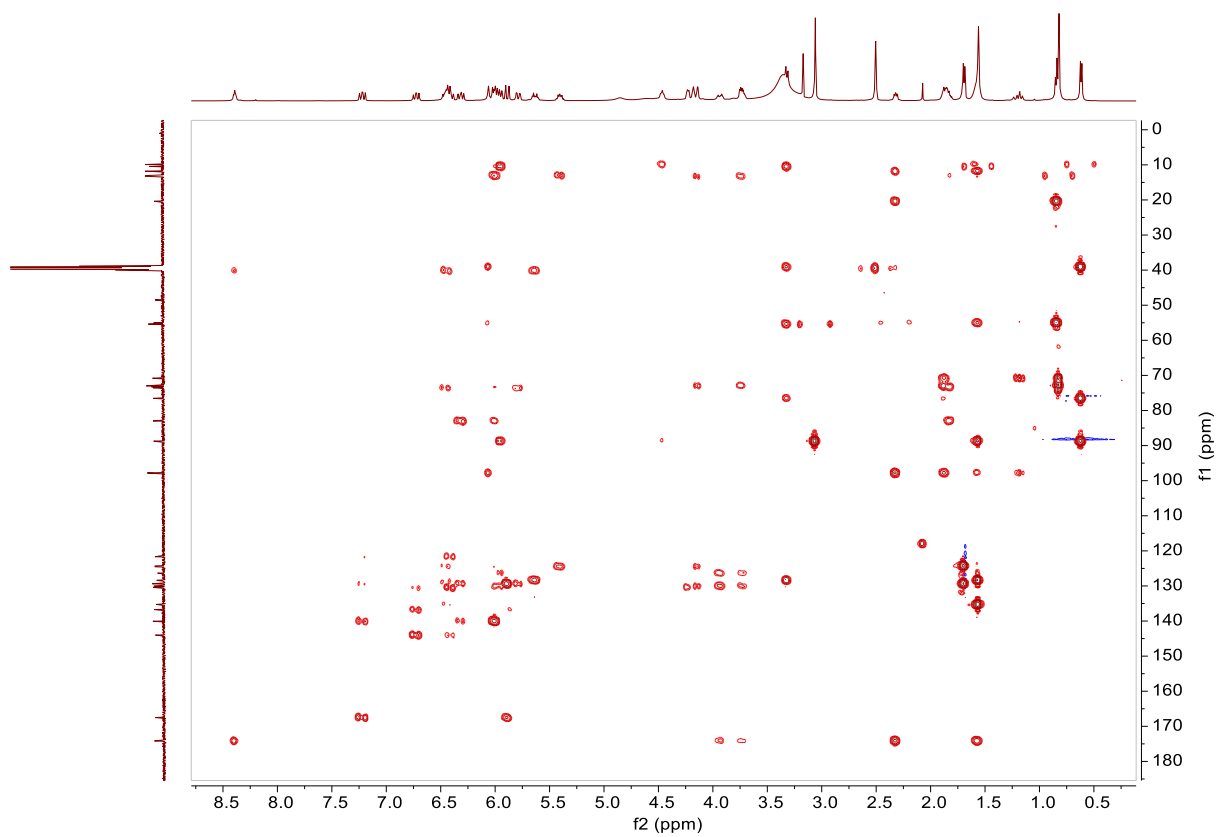

**Supplementary Fig. 43.** HMBC spectrum (500 MHz, DMSO-*d*<sub>6</sub>) of cattlemycin A (**1a**).

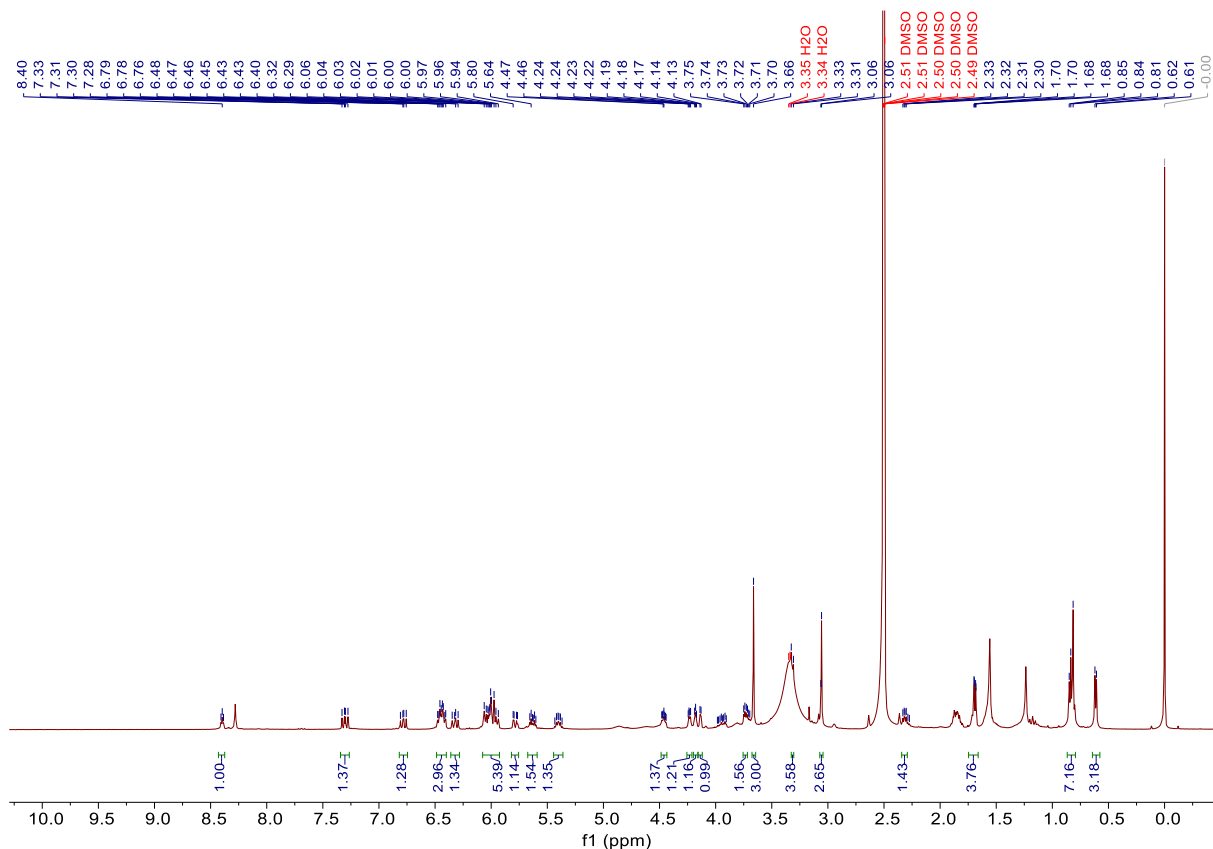

Supplementary Fig. 44.  $^1\text{H}$  NMR spectrum (500 MHz,  $\text{DMSO-}d_6$ ) of cattlemycin D (**1d**).

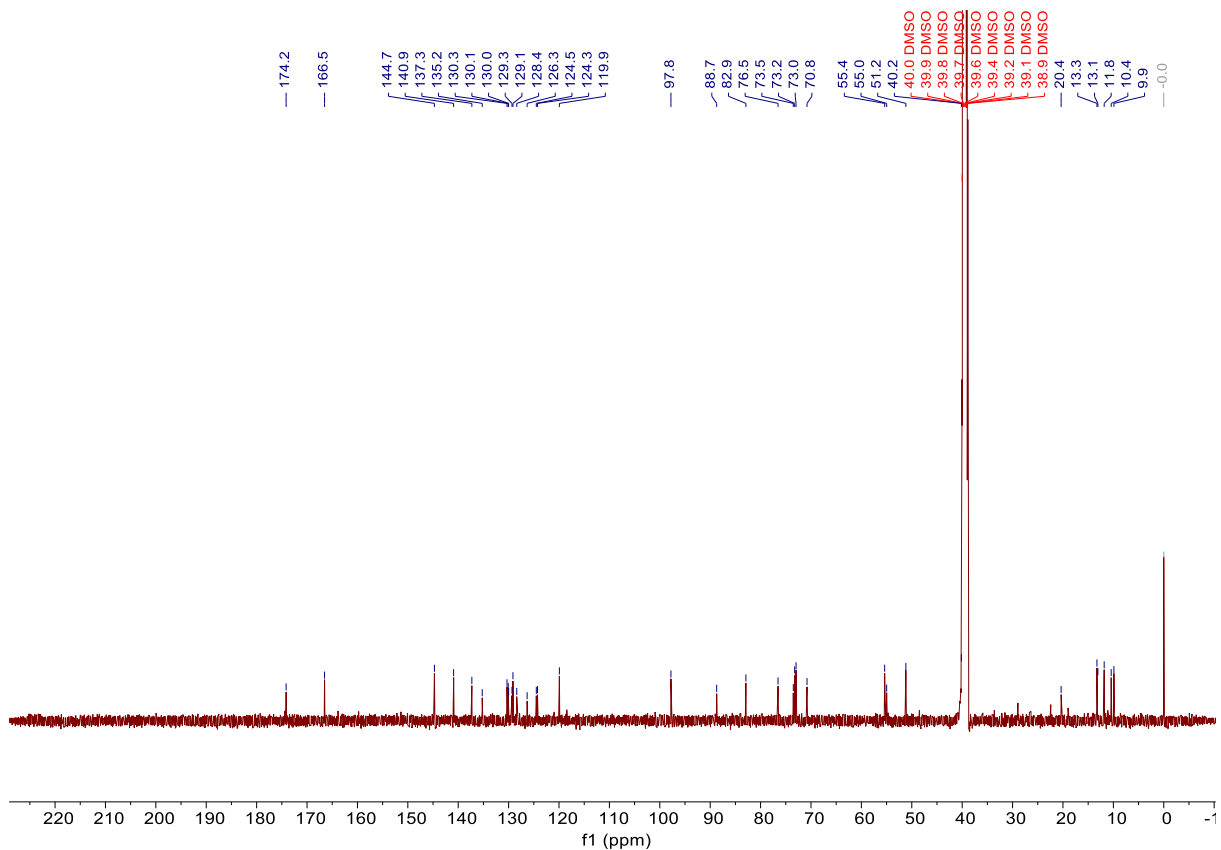

Supplementary Fig. 45.  $^{13}\text{C}$  NMR spectrum (125 MHz,  $\text{DMSO-}d_6$ ) of cattlemycin D (**1d**).

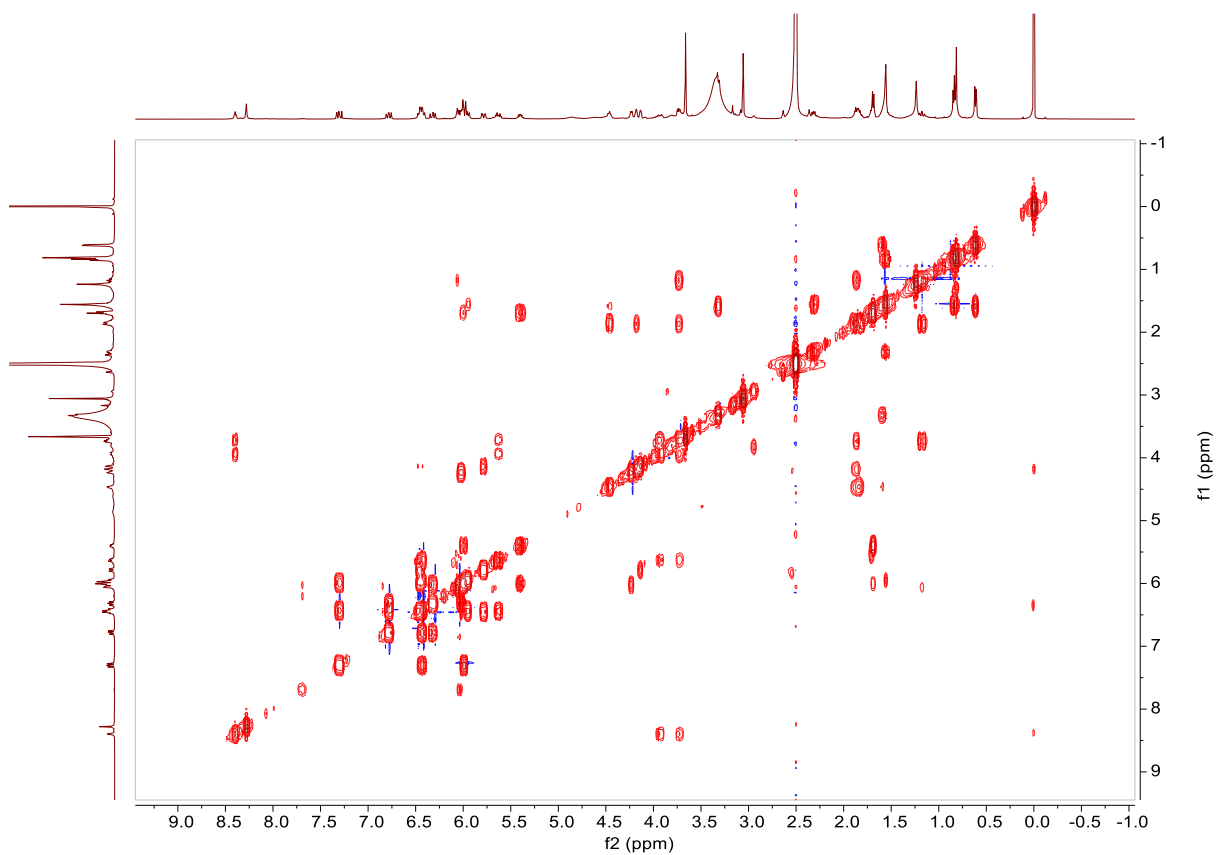

**Supplementary Fig. 46.**  $^1\text{H}, ^1\text{H}$ -COSY spectrum (500 MHz,  $\text{DMSO-}d_6$ ) of cattlemycin D (**1d**).

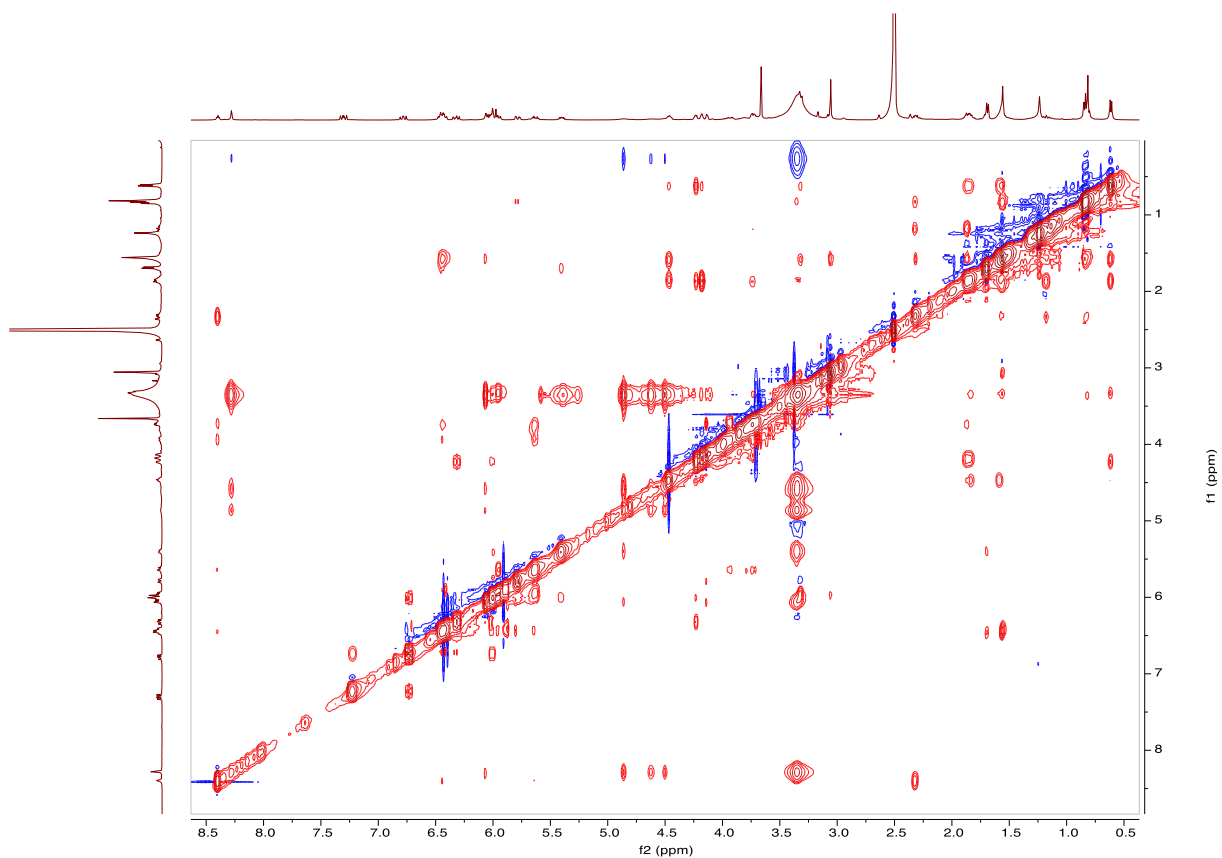

**Supplementary Fig. 47.**  $^1\text{H}, ^1\text{H}$ -NOESY spectrum (600 MHz,  $\text{DMSO-}d_6$ ) of cattlemycin D (**1d**).

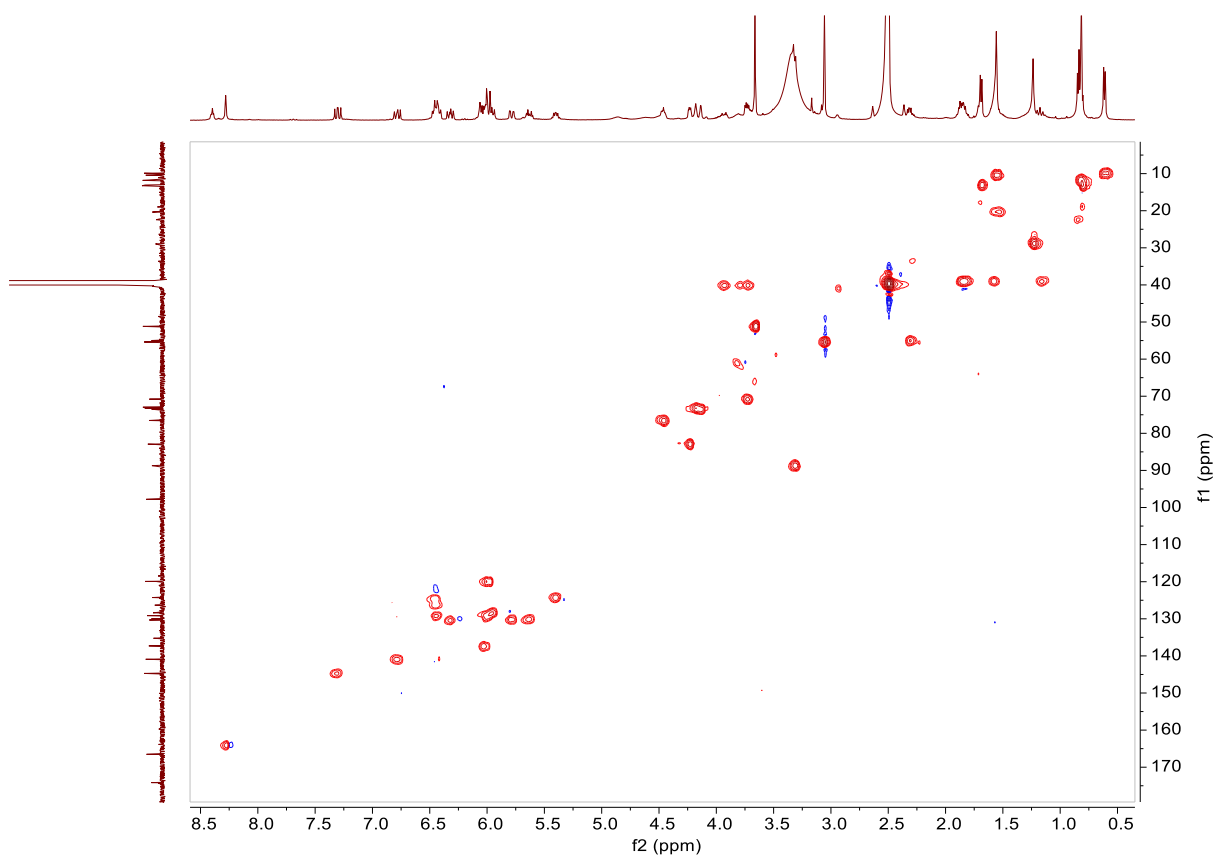

**Supplementary Fig. 48.** HSQC spectrum (500 MHz, DMSO-*d*<sub>6</sub>) of cattlemycin D (**1d**).

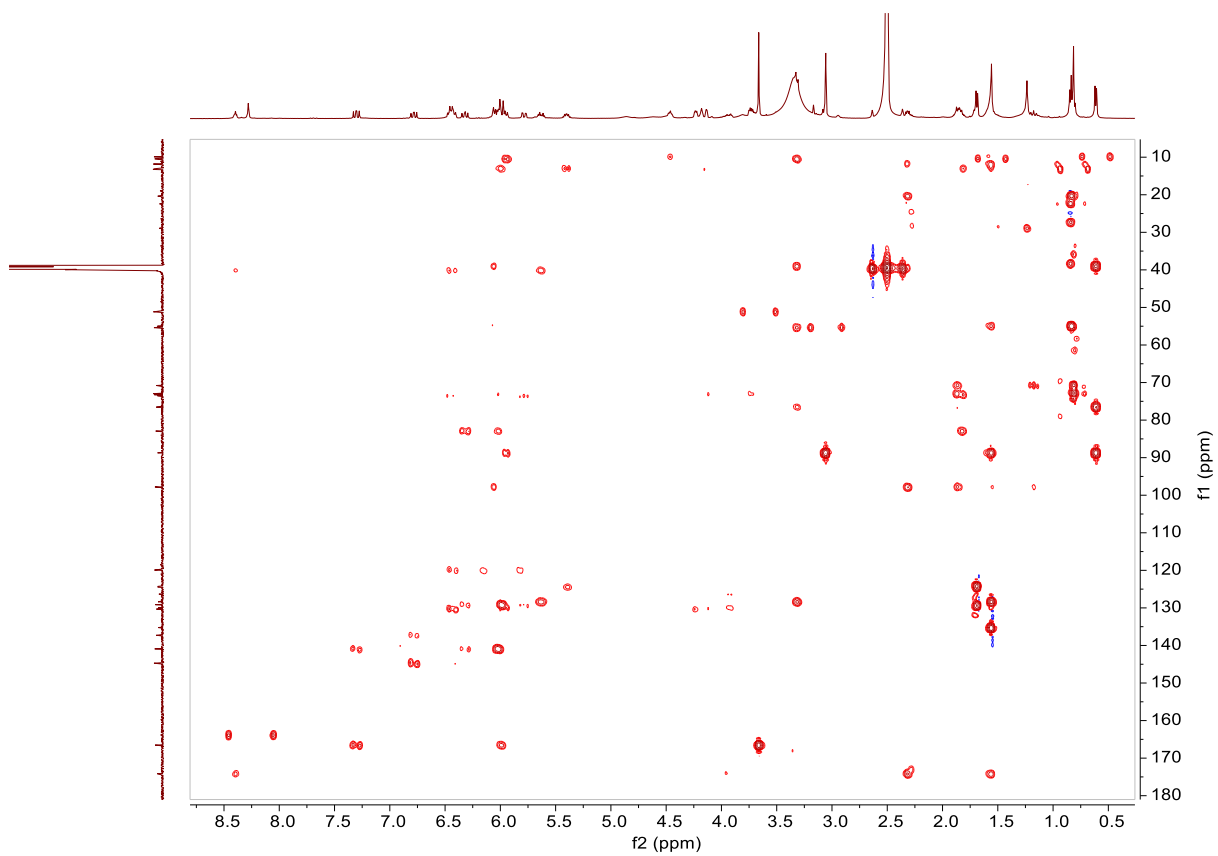

**Supplementary Fig. 49.** HMBC spectrum (500 MHz, DMSO-*d*<sub>6</sub>) of cattlemycin D (**1d**).

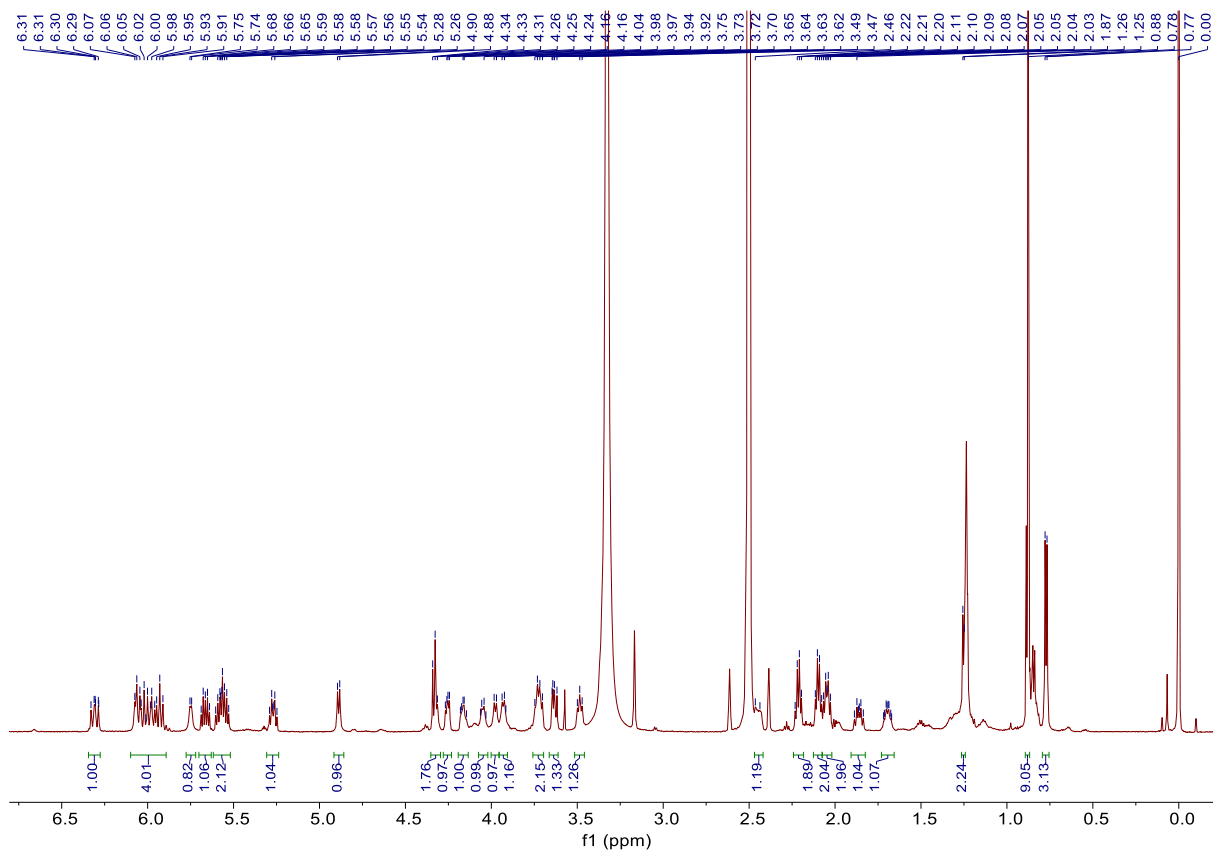

Supplementary Fig. 50.  $^1\text{H}$  NMR spectrum (600 MHz,  $\text{DMSO-}d_6$ ) of butyrolactol A (**2a**).

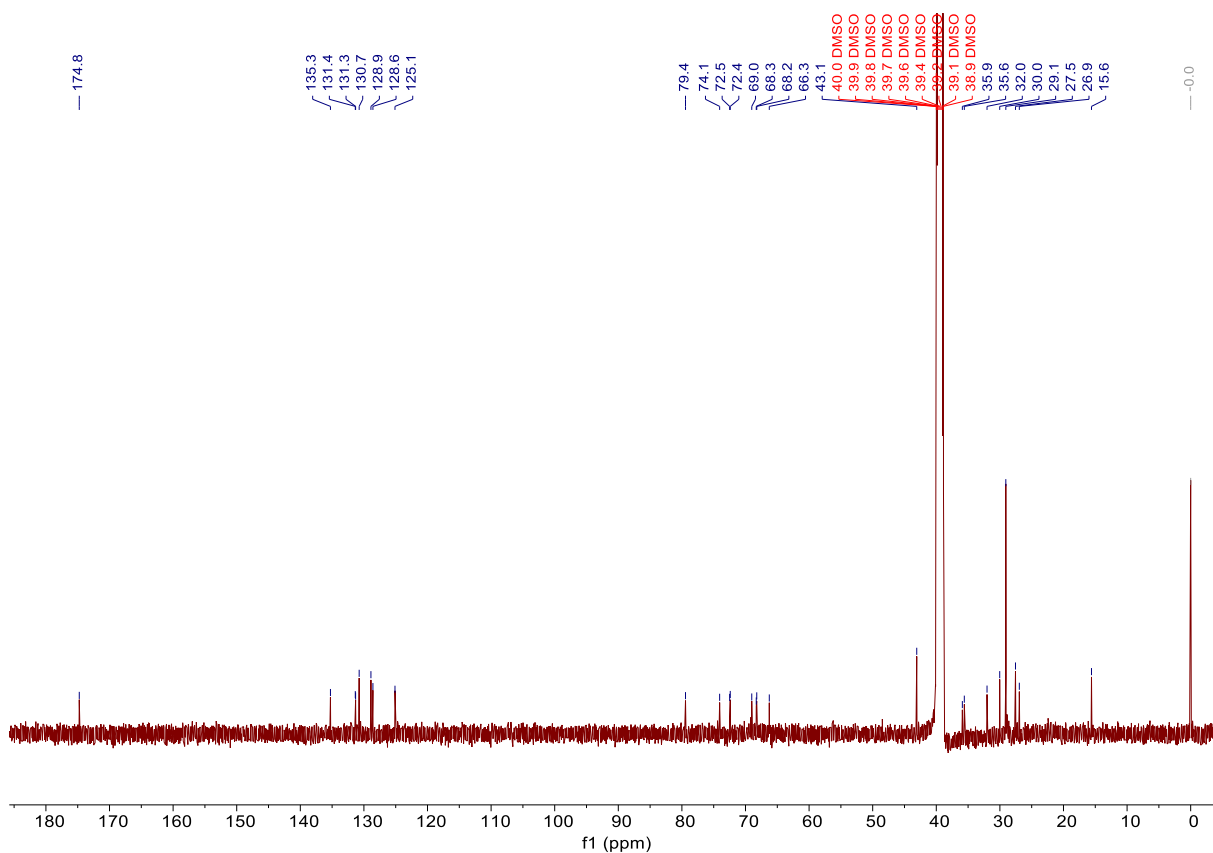

Supplementary Fig. 51.  $^{13}\text{C}$  NMR spectrum (125 MHz,  $\text{DMSO-}d_6$ ) of butyrolactol A (**2a**).

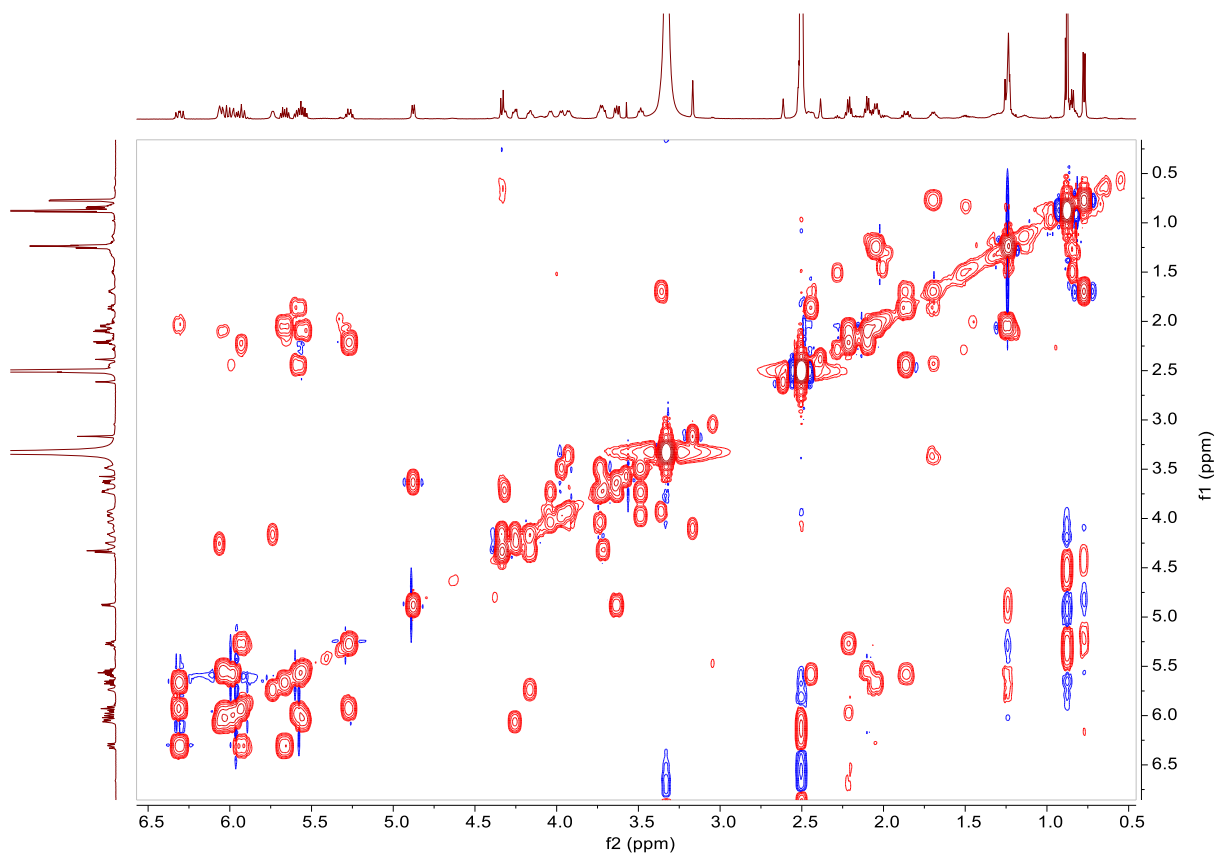

**Supplementary Fig. 52.**  $^1\text{H}$ ,  $^1\text{H}$ -COSY spectrum (600 MHz,  $\text{DMSO-}d_6$ ) of butyrolactol A (**2a**).

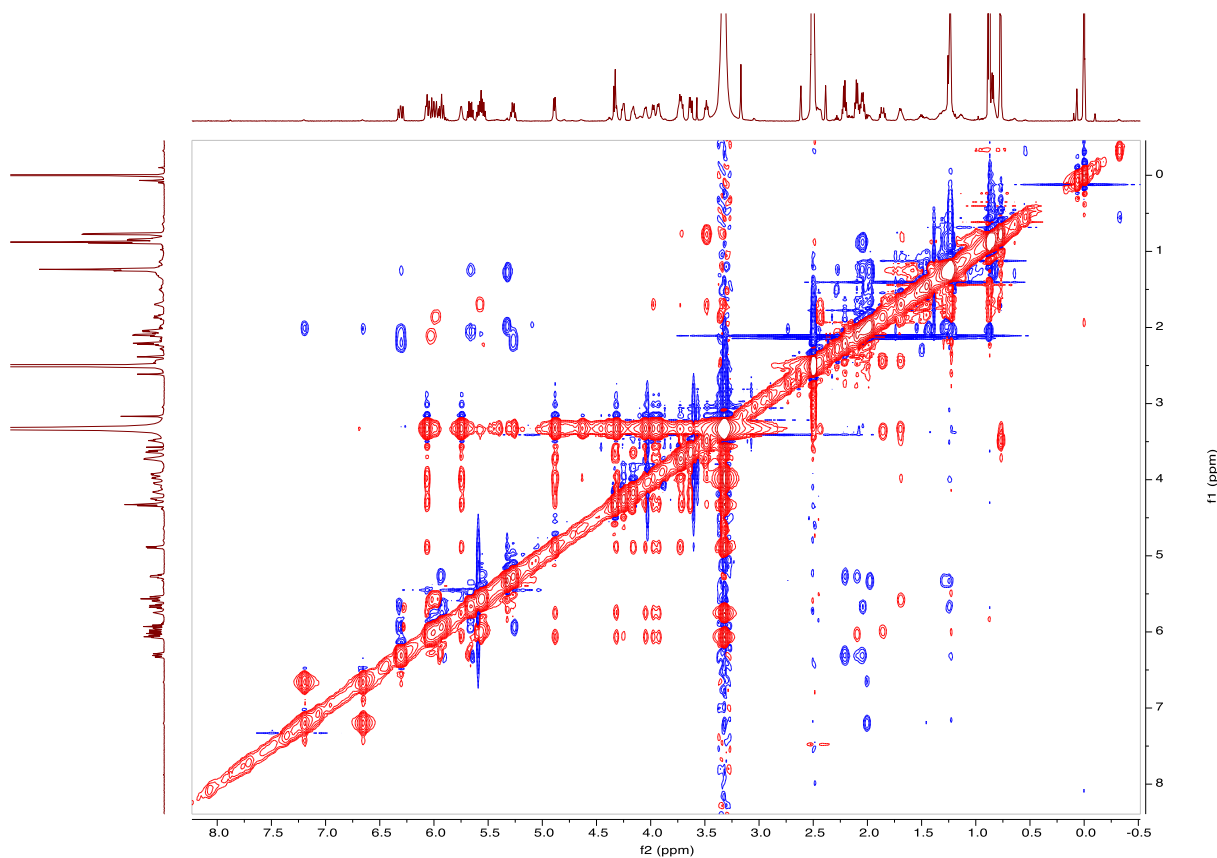

**Supplementary Fig. 53.**  $^1\text{H}$ ,  $^1\text{H}$ -NOESY spectrum (500 MHz,  $\text{DMSO-}d_6$ ) of butyrolactol A (**2a**).



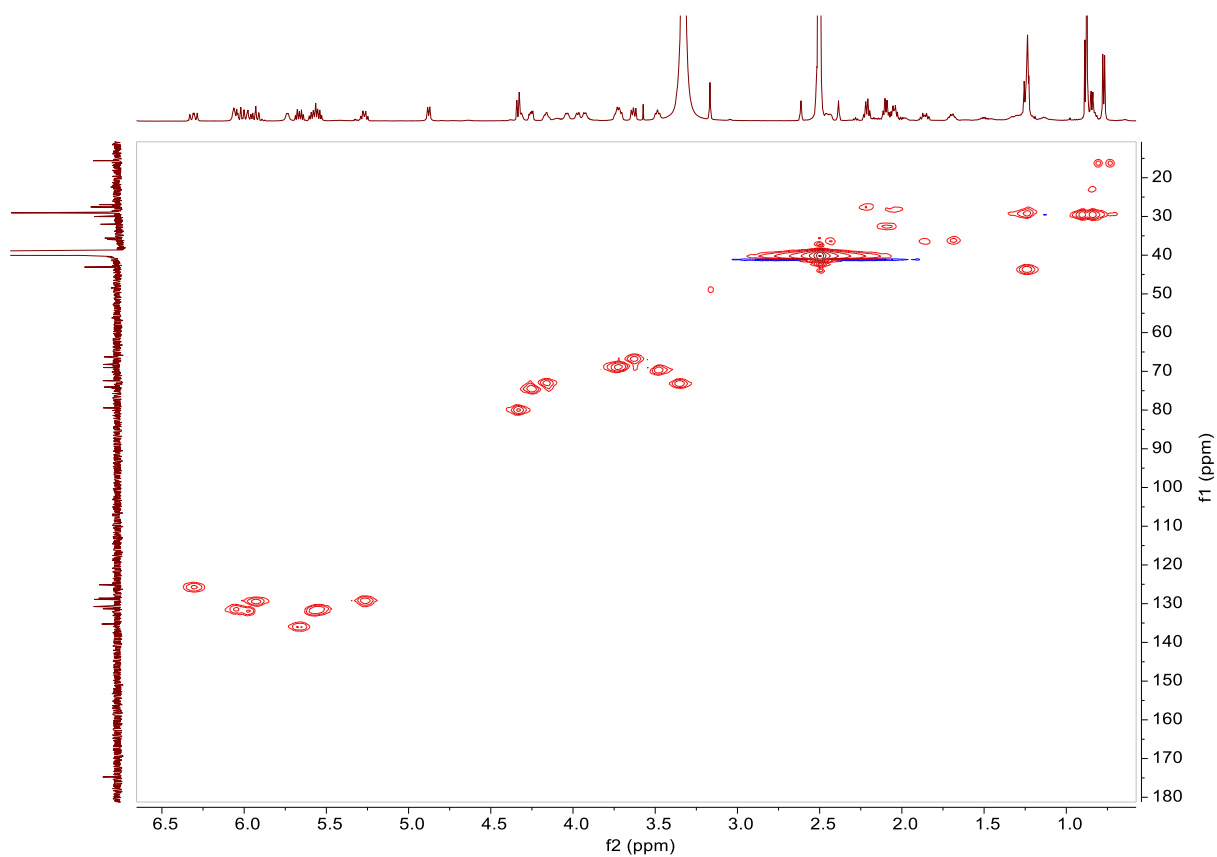

**Supplementary Fig. 54.** HSQC spectrum (600 MHz, DMSO- $d_6$ ) of butyrolactol A (**2a**).

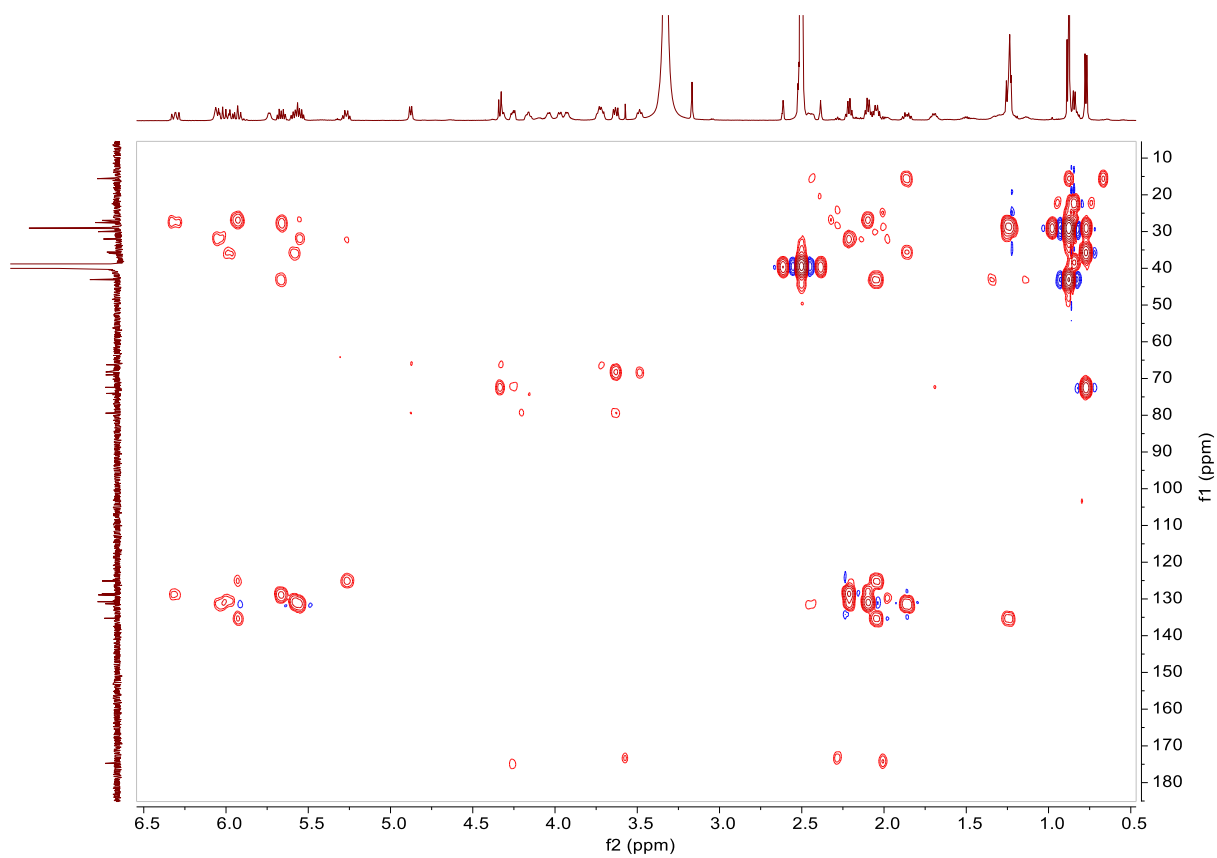

**Supplementary Fig. 55.** HMBC spectrum (600 MHz, DMSO- $d_6$ ) of butyrolactol A (**2a**).

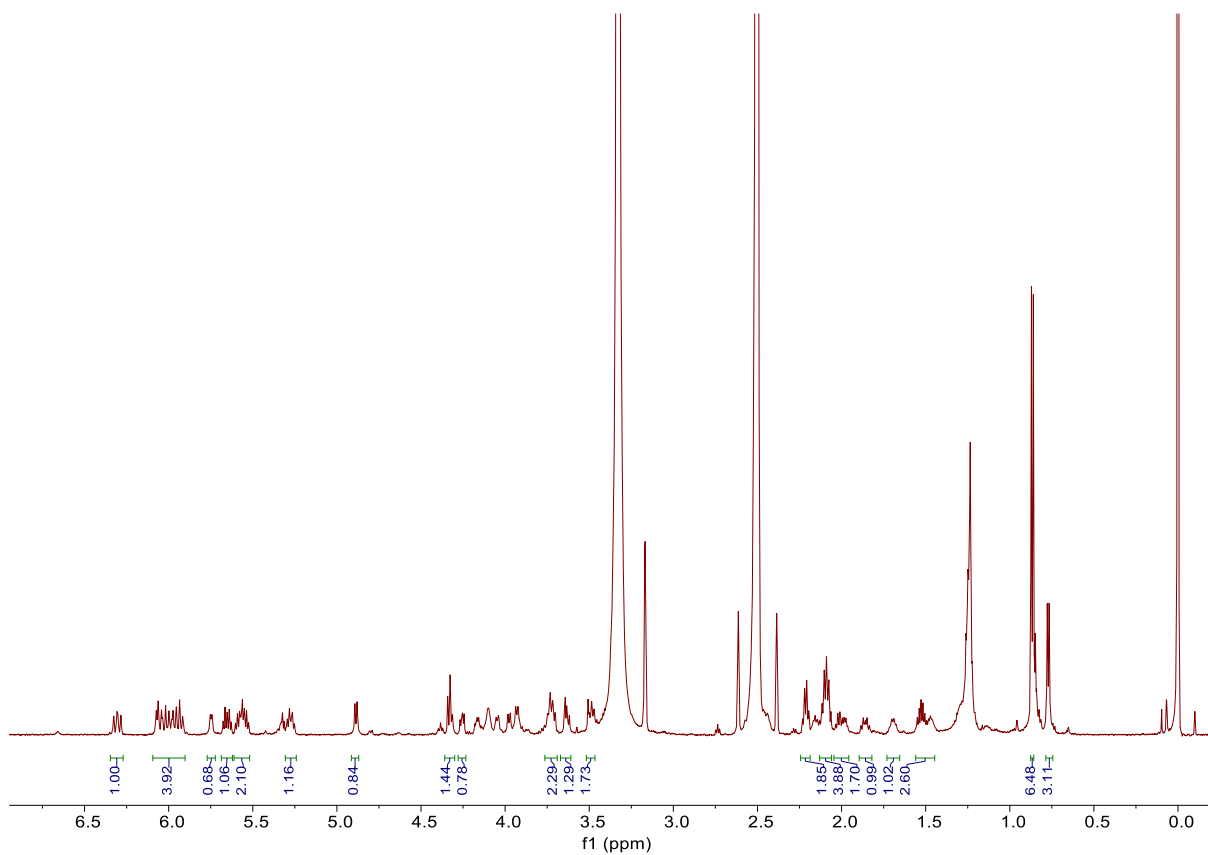

Supplementary Fig. 56.  $^1\text{H}$  NMR spectrum (600 MHz,  $\text{DMSO}-d_6$ ) of butyrolactol B (**2b**).

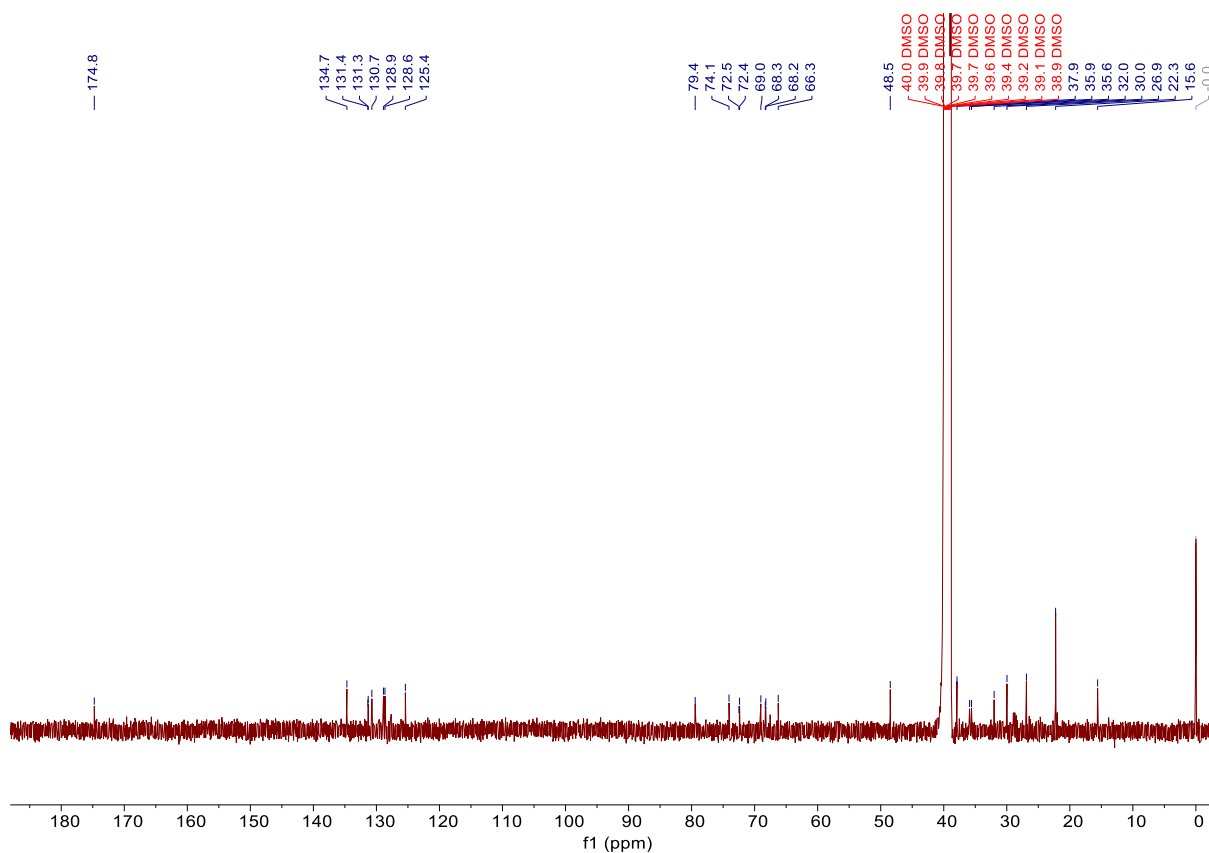

Supplementary Fig. 57.  $^{13}\text{C}$  NMR spectrum (125 MHz,  $\text{DMSO}-d_6$ ) of butyrolactol B (**2b**).

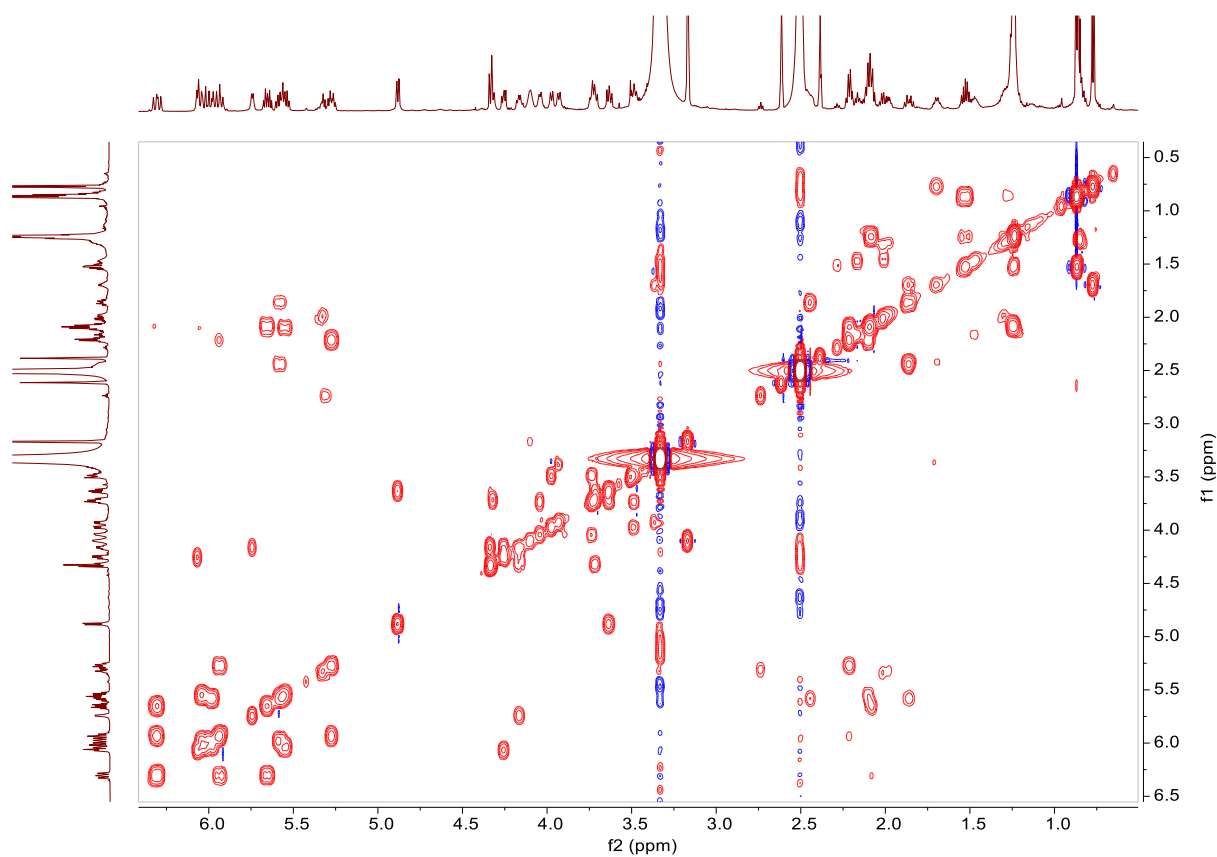

**Supplementary Fig. 58.**  $^1\text{H}$ ,  $^1\text{H}$ -COSY spectrum (600 MHz,  $\text{DMSO-}d_6$ ) of butyrolactol B (**2b**).

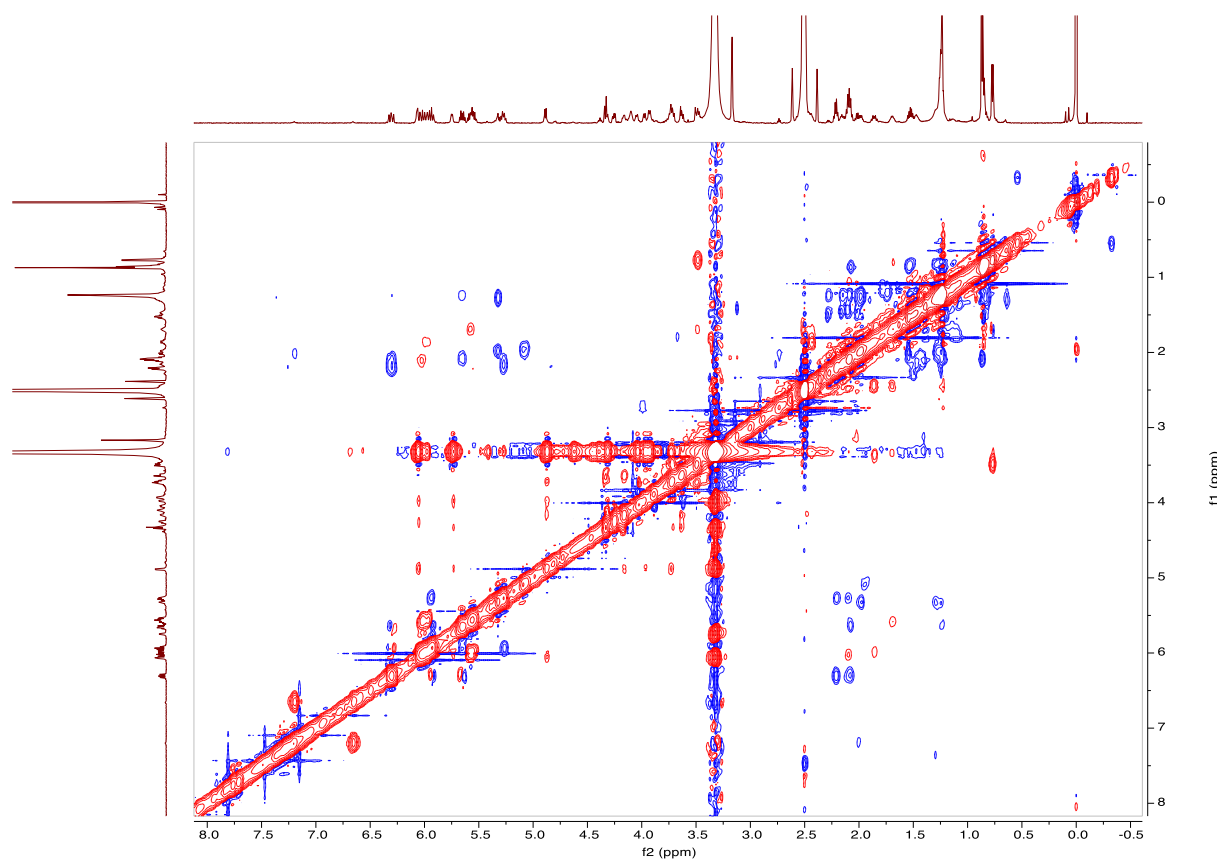

**Supplementary Fig. 59.**  $^1\text{H}$ ,  $^1\text{H}$ -NOESY spectrum (500 MHz,  $\text{DMSO-}d_6$ ) of butyrolactol B (**2b**).

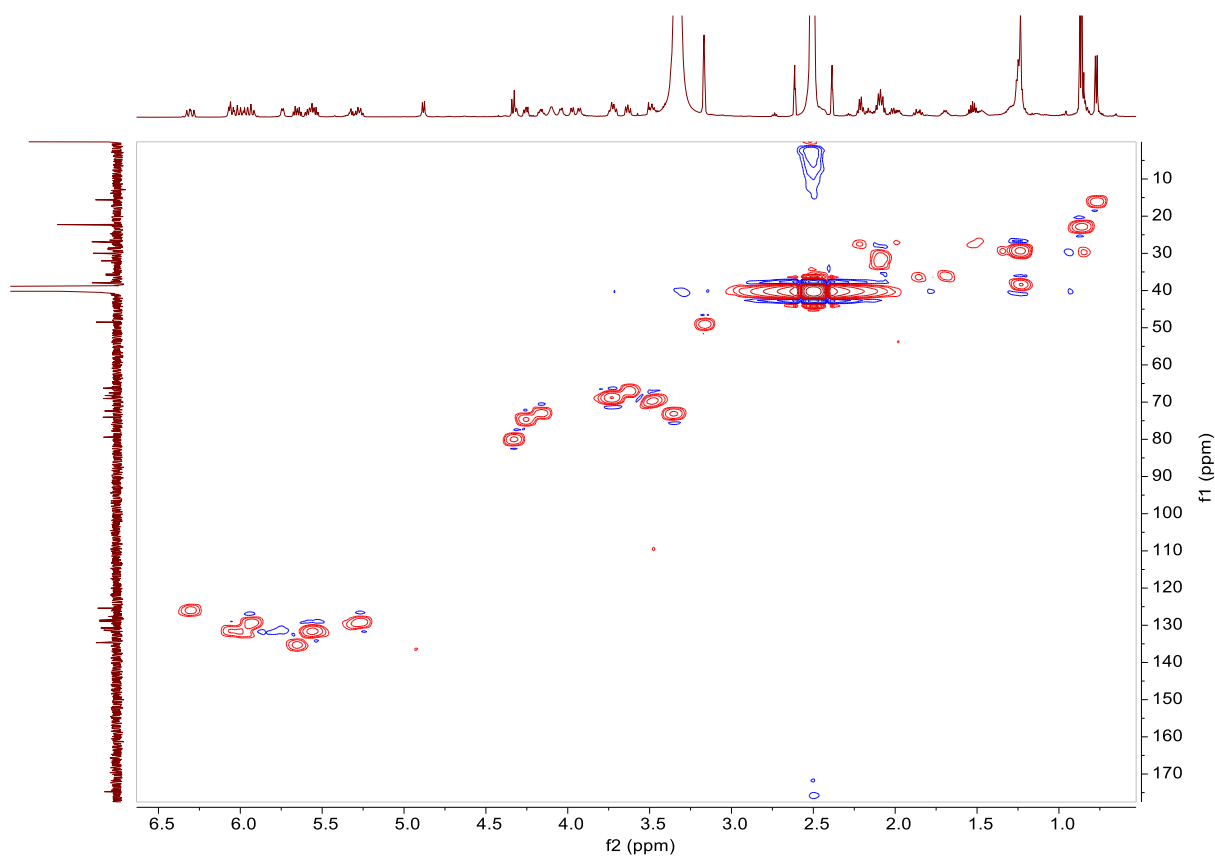

Supplementary Fig. 60. HSQC spectrum (600 MHz, DMSO-*d*<sub>6</sub>) of butyrolactol B (**2b**).

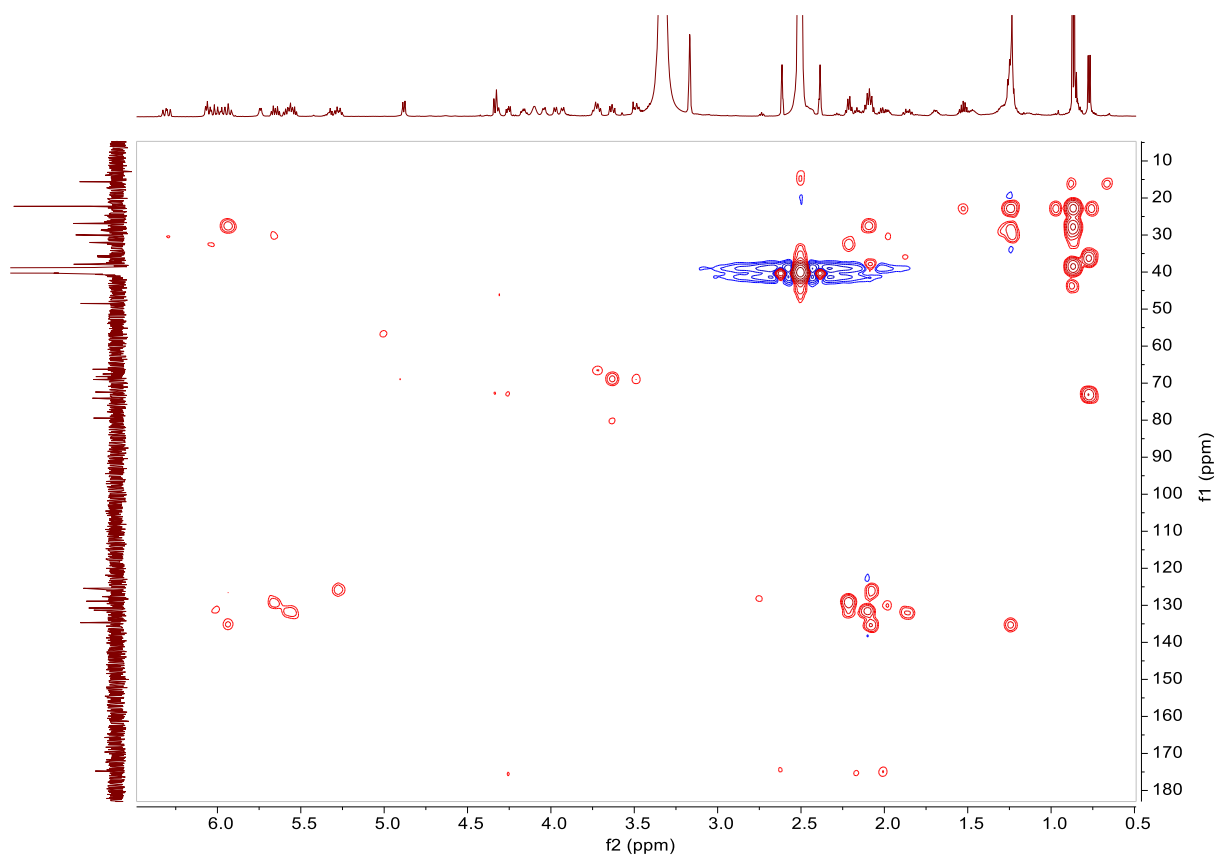

Supplementary Fig. 61. HMBC spectrum (600 MHz, DMSO-*d*<sub>6</sub>) of butyrolactol B (**2b**).

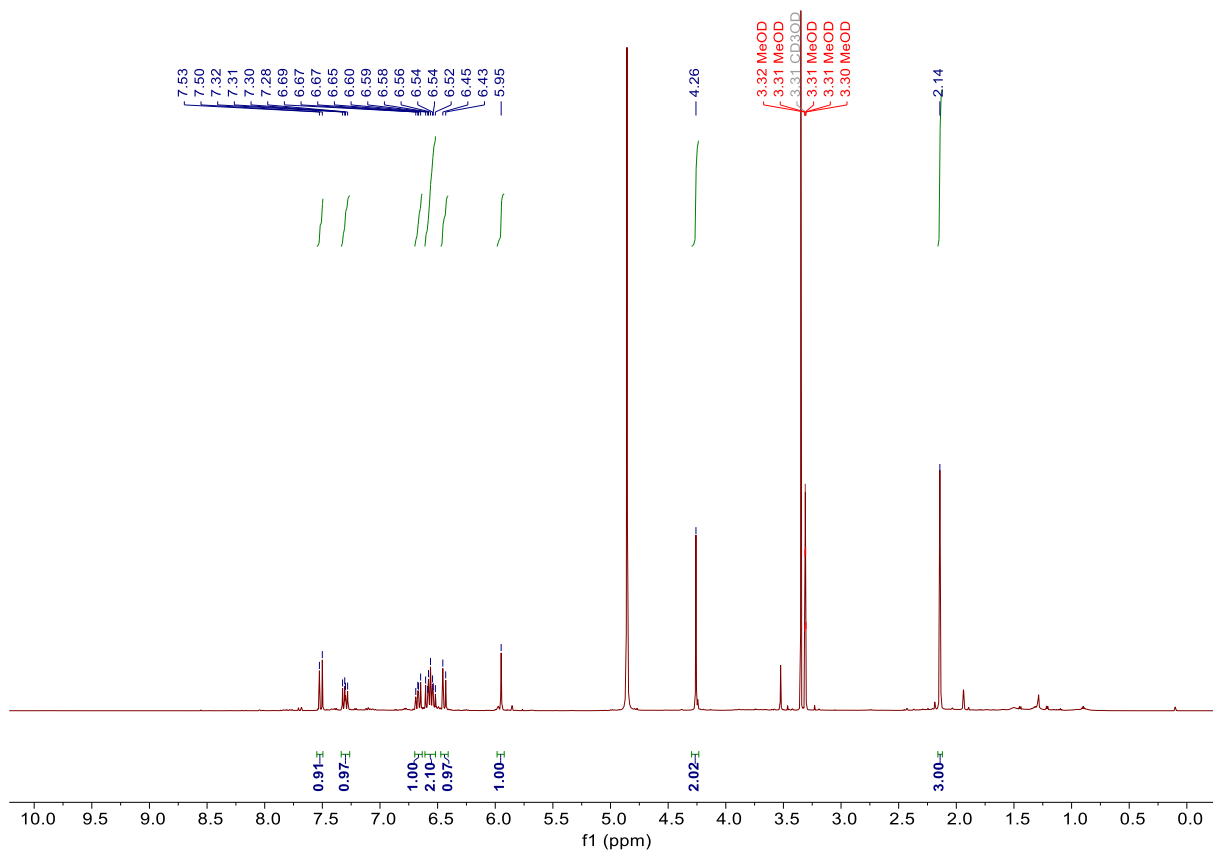

Supplementary Fig. 62.  $^1\text{H}$  NMR spectrum (600 MHz,  $\text{MeOH-}d_4$ ) of cattleyatetronate A (**3a**).

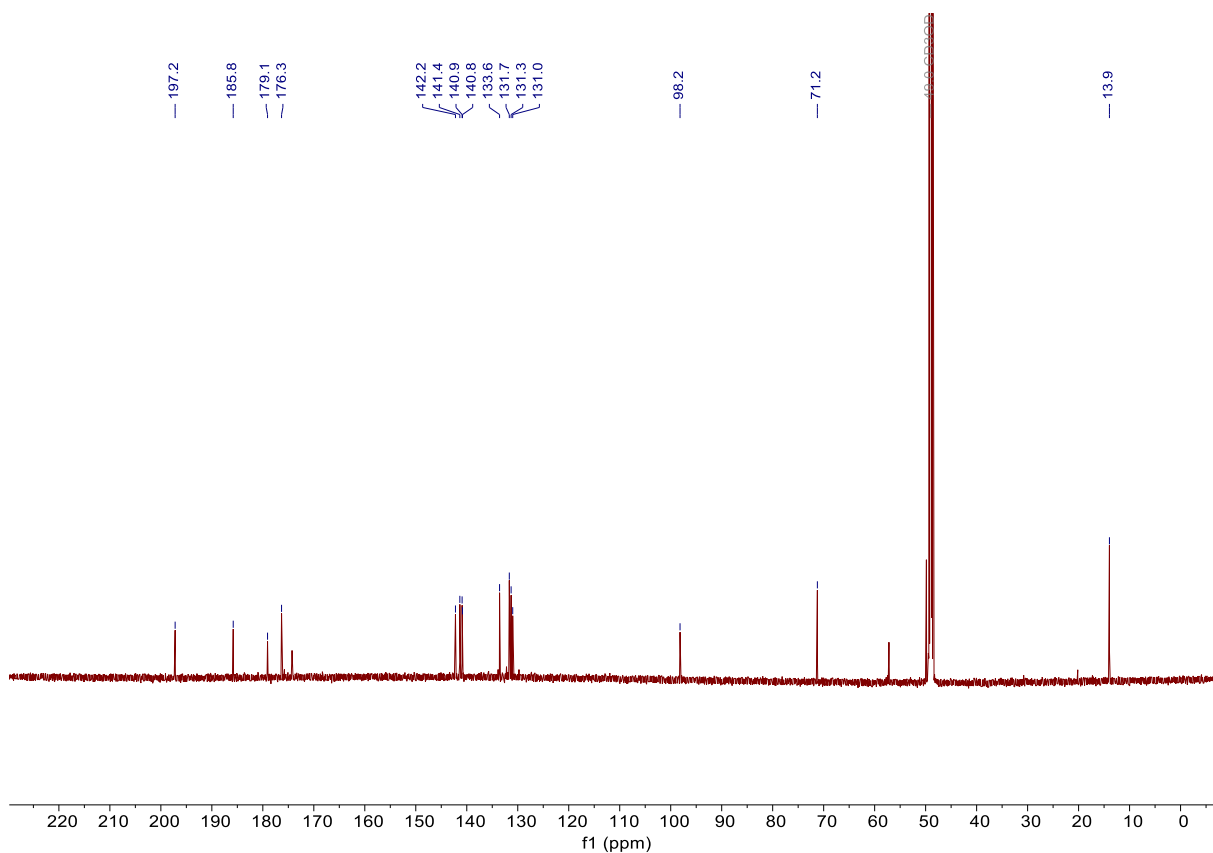

Supplementary Fig. 63.  $^{13}\text{C}$  NMR spectrum (150 MHz,  $\text{MeOH-}d_4$ ) of cattleyatetronate A (**3a**).

C13DEPT135 MeOD D:\ root 17

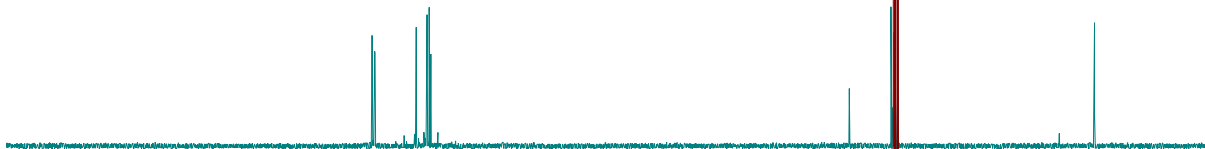

C13CPD MeOD D:\ root 16

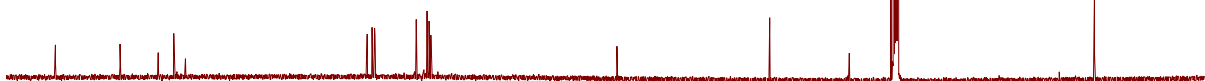

**Supplementary Fig. 64.** DEPT135 spectrum (150 MHz, MeOH-*d*<sub>4</sub>) of cattleyatetronate A (**3a**).

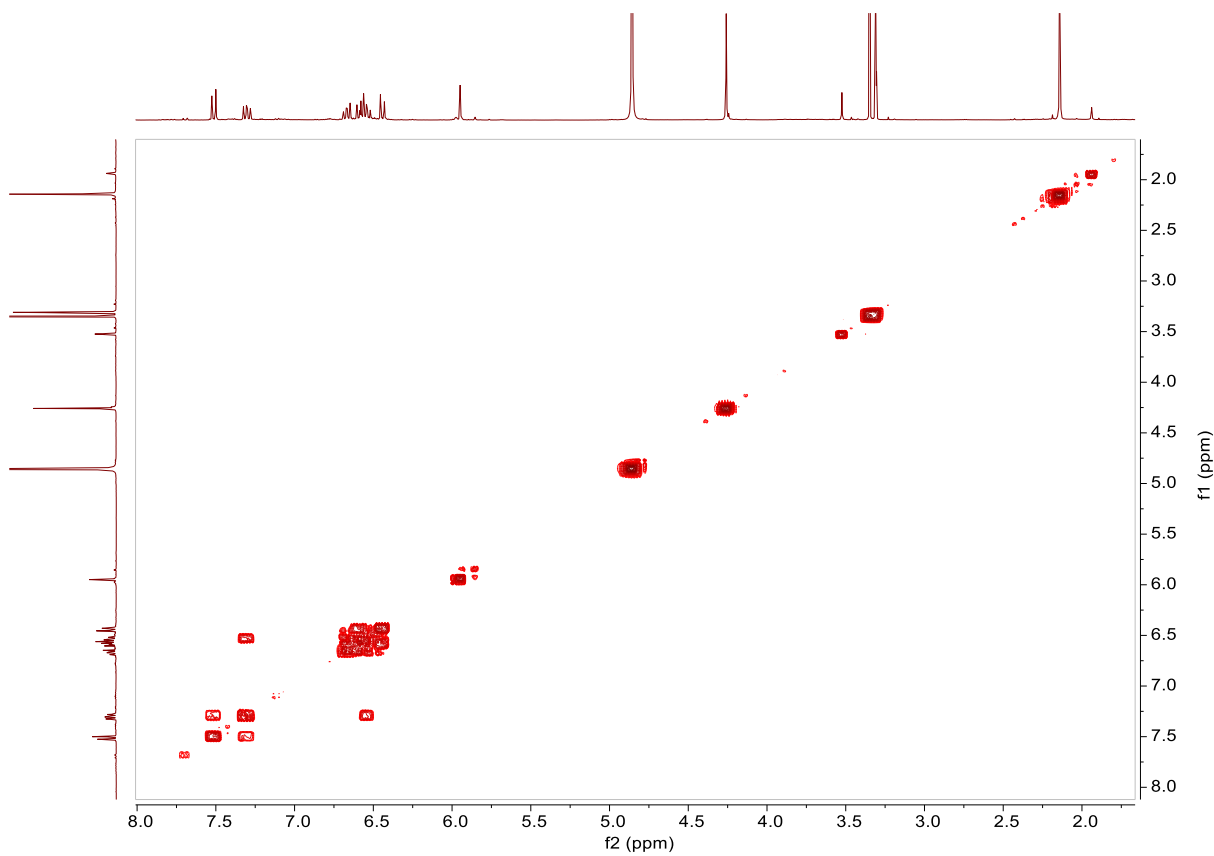

**Supplementary Fig. 65.** <sup>1</sup>H, <sup>1</sup>H-COSY spectrum (600 MHz, MeOH-*d*<sub>4</sub>) of cattleyatetronate A (**3a**).

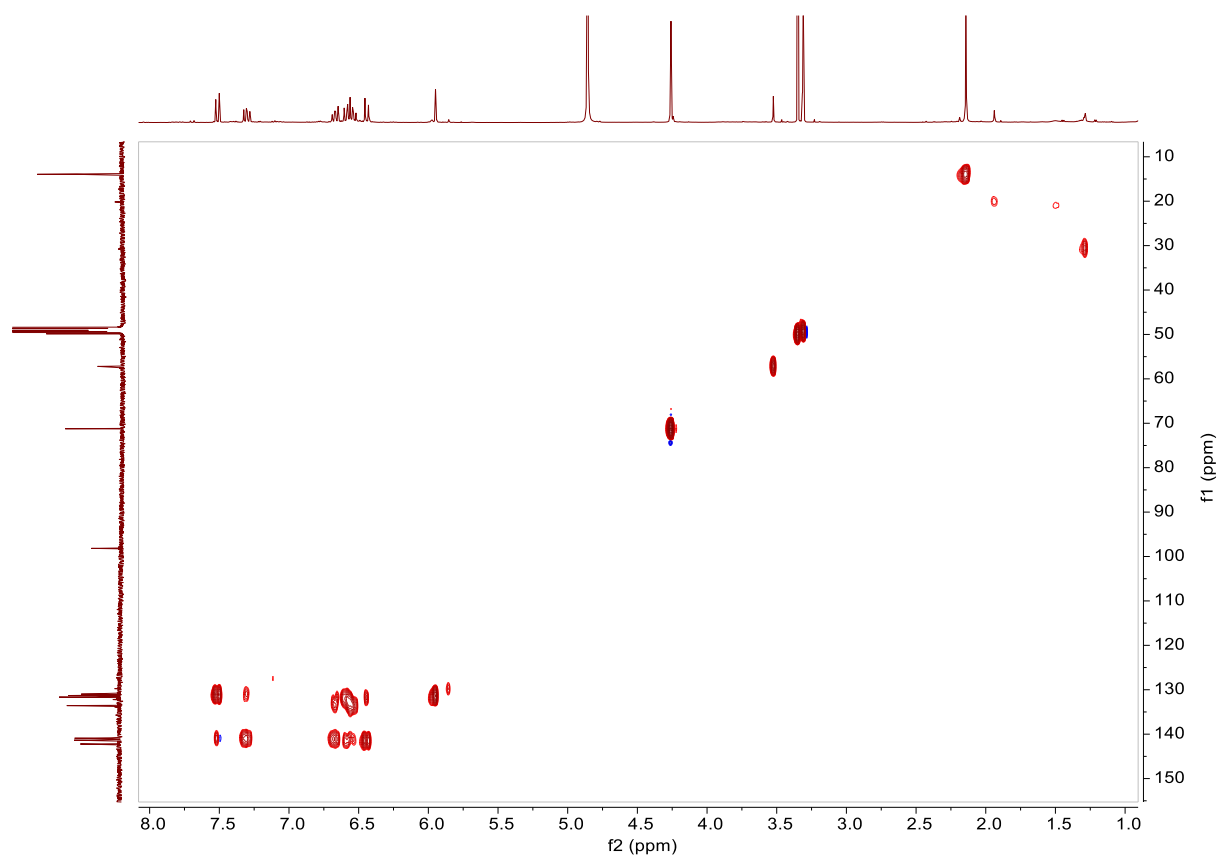

**Supplementary Fig. 66.** HSQC spectrum (600 MHz, MeOH-*d*<sub>4</sub>) of cattleyatetronate A (**3a**).

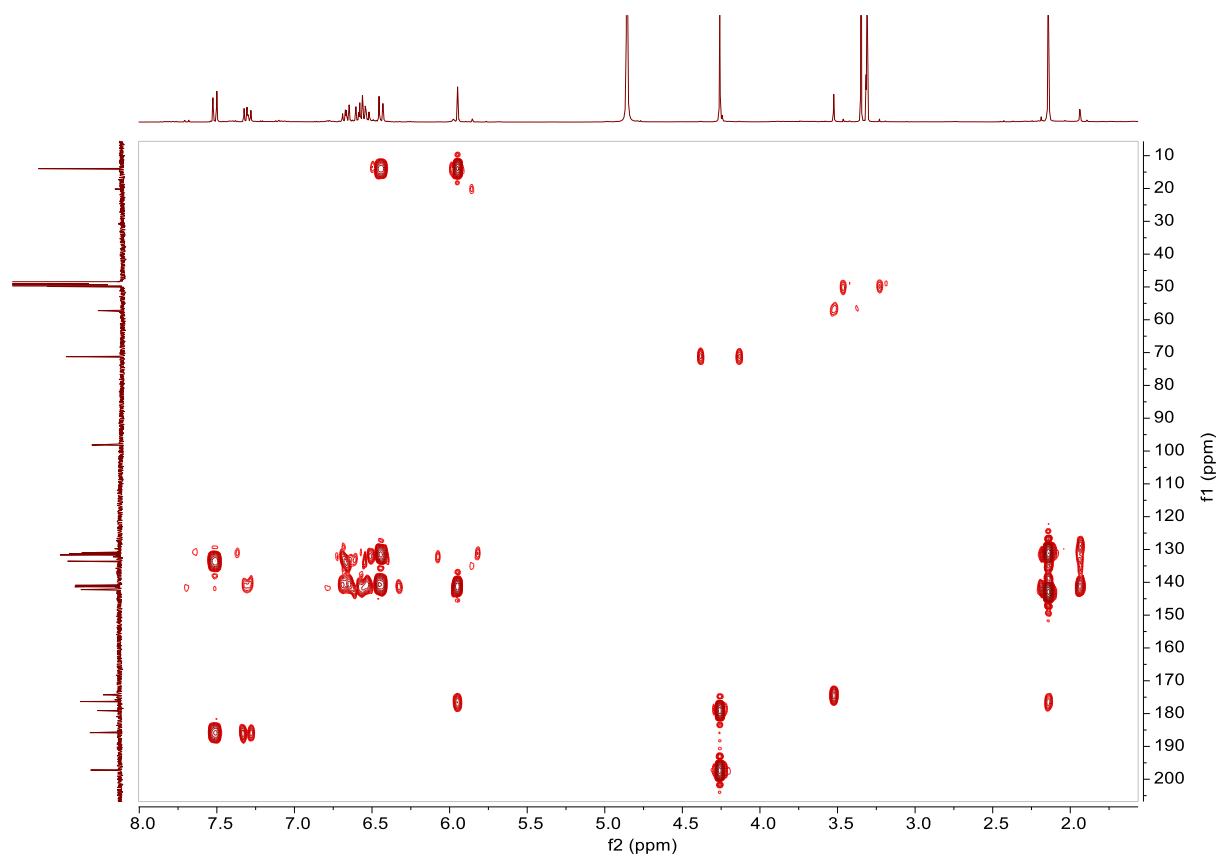

**Supplementary Fig. 67.** HMBC spectrum (600 MHz, MeOH-*d*<sub>4</sub>) of cattleyatetronate A (**3a**).

## Supplementary Methods

### Instruments and materials

HPLC–HRMS analyses were performed on an Agilent 1290 HPLC with 6546 QTOF MS system. HPLC–DAD–MS analyses were performed on an Agilent 1260 HPLC with a DAD detector and a 6125B MSD detector. Semipreparative HPLC was carried out using an Agilent 1260 or a Shimadzu LC-20AD system. In all HPLC analyses, a mobile phase of (A) H<sub>2</sub>O with 0.1% formic acid and (B) acetonitrile with 0.1% formic acid were used unless otherwise specified. NMR spectra were acquired on Bruker 500 or 600 MHz AVANCE NEO spectrometers with tetramethylsilane as the internal standard. The strains *S. avermitilis* MA-4680 and *S. cattleya* NRRL 8057 were obtained from the China General Microbiological Culture Collection Center (CGMCC). Strain cultivation was performed at 28 °C in an incubator for agar plates or in a rotary shaker at 200 rpm for liquid media. Polyketide standards were purchased from Energy Chemical (Shanghai; for erythromycin), Bide Pharm (Shanghai; for rifamycin S, midecamycin, rapamycin, and natamycin), and Shanghai Yuanye Bio-Technology (Shanghai; for clarithromycin, amphotericin B, and nystatin).

### Strain preparation and fermentation

Three media were utilized in this study, including ISP2 medium (yeast extract 0.4 g, malt extract 1 g, glucose 0.4 g, distilled water up to 100 mL, pH 7.2), A3M medium (soluble starch 0.2 g, glycerol 0.2 g, glucose 0.5 g, yeast extract 0.3 g, cotton seed powder 1.5 g, Diaion HP-20 1 g, distilled water up to 100 mL, pH 7.0) and MSF agar medium (mannitol 2 g, soy flour 2 g, agar 2 g, distilled water up to 100 mL). The seed culture of *S. avermitilis* was prepared by culturing in ISP2 medium for 3 days, which was then inoculated on MSF agar plates (20 mL medium/plate, 10 days incubation) with a 1% inoculation for polyketide production. The seed culture of *S. cattleya* was prepared by culturing in ISP2 medium for 2 days, which was then inoculated in ISP2 medium (100 mL/flasks, 3 days), A3M medium (100 mL/flasks, 3 days), and MSF agar plates (20 mL/plate, 10 days) with a 1% inoculation for polyketide production.

### Standard conditions for HPLC-HRMS analysis

Chromatographic analyses were performed using an Agilent Poroshell 120 EC-C18 column (2.1x100 mm, 2.7 µm). The mobile phase consisted of phase A and B with gradient program (0-10 min, 5-100% B; 10-14 min, 100 % B; 14-14.1 min, 100-5% B; 14.1-16 min, 5% B) at a flow rate of 0.4 mL/min at 40 °C. Scan MS and MS/MS data were recorded on an Agilent 6546 QTOF MS system equipped with a Dual Auto Jet Stream ESI. The ESI was operated in both positive and negative modes, with the following parameters: Gas Temp: 325 °C; Drying Gas: 8 L/min; Nebulizer: 35 psi; Sheath Gas Temp: 350 °C; Sheath Gas Flow: 11 L/min; VCap: 3500 V; Nozzle Voltage: 1000V; Fragmentor: 175V; Skimmer: 65 V; Oct1 RF Vpp: 750V. For Scan MS detection, the mass range of m/z was set from 100 to 1700. For MS/MS detection, the energy for collision-induced dissociation (CID) was set to 10, 20, 30 and 40 eV, with mass range of m/z 50-1700.

### Construction of an in-house MS/MS database of bacterial T1PKs.

The MS and MS/MS spectra of 8 commercially available polyketides (**s1-s8**) were manually analyzed for fragmentation assignment. The MS and MS/MS spectra of reported polyketides (**r1-r222**) were gathered from 59 references and were summarized in **Supplementary Dataset 1**. The references were selected under the criteria of: (i) polyketides produced by bacterial modular type I polyketide synthases;



(ii) the biosynthesis of the polyketides involve more than 5 PKS modules and less than two NRPS modules; (iii) MS analyses performed utilizing a soft ionization source such as ESI or MALDI, and MS/MS analyses employed collision techniques such as CID or HCD. A limited number of semi-synthetic polyketides were also included to facilitate accurate fragment assignments.

### Bioinformatic structural prediction for NegMDF

The flow chart depicting the definition of the NegMDF window is presented in **Supplementary Fig. 1**. Genome mining of *S. avermitilis* MA-4680 (GenBank: GCF\_000009765.2\_ASM976v2) and *S. cattleya* NRRL 8057 (GenBank: GCF\_000237305.1\_ASM23730v1) was conducted using antiSMASH 7.0<sup>38</sup>. BGC similarity search was performed by KnownClusterBlast in antiSMASH.

Structural prediction of a PKS BGC was performed by separating the biosynthesis into starter unit loading, PKS elongation, PKS offloading, and post-PKS modification. Predictions were made based on the domain types predicted by antiSMASH, or by CD-search and BLAST. Phylogenetic analyses were performed by the FastTree 2.1 plugin in Geneious Prime 2024.0.1 (<https://www.geneious.com>) using the amino acid alignment made by MAFFT G-INS-i algorithm.

### Metabolomics data processing for NegMDF

For metabolomics analysis of strains in liquid media, 0.5 mL of each sample was taken and freeze-dried. Then, 0.5 mL MeOH was added and the mixture was treated with ultrasound for 15 min. For strains culturing on agar media, one plate of each sample was collected and extracted using 20 mL of MeOH with ultrasound for 15 min. After centrifugation, the supernatant was analyzed by HPLC-HRMS employing negative ESI and Scan MS modes. The obtained raw data were then transformed into an mzXML file using MSconvert<sup>62</sup> and subsequently processed using MZmine 3 (version 3.2.8)<sup>63</sup> to extract all detected ions. The MZmine workflow and relevant parameters were as follows: (I) Mass detection. Polarity: negative. MS level: 1. (II) ADAP chromatogram builder. Retention time: 0.5-12.0 min. Group intensity threshold: 5.0E3. Min. highest intensity: 2.0E3. Scan to scan accuracy (m/z): 0.005 m/z or 20.0 ppm. (III) Local minimum resolver. Chromatographic threshold: 90%. Min. search range RT: 0.05. Min. relative height: 0.001%. Min. absolute height: 1.0E3. Min. ration of peak top/edge: 1.50. Peak duration range: 0-2. Min. of data point: 4. (IV) <sup>13</sup>C isotope filter. m/z tolerance 0.005 m/z or 10.0 ppm. Retention tolerance 0.02. (V) Export feature list as CSV file. The resulting file should contain the retention time (RT), m/z, and peak area information of all ions. The ions with peak area less than 2.0E3 and ions from media were removed.

The extracted ions were then screened according to the structural prediction results by a script (for details, see “the Python script for NegMDF screening” section). To confirm the identity of each hit, targeted MS/MS analysis was conducted to examine the fragmentation patterns of each ion by manual inspection.

### Isolation of polyketides

The fermentation culture of *S. cattleya* in ISP2 medium (500 mL, 9 days) was collected and extracted using EtOAc (500 mL x 3 times). After removing the solvent in vacuo, the crude extract was redissolved in MeOH and separated on a Shimadzu semipreparative HPLC system. Compounds **1a** was purified using a YMC C18 column (250 mm × 10 mm, 5 μm, YMC) with isocratic 45% B at 4 mL/min. Cattlemycin A (**1a**): white solid, 5.0 mg; [ $\alpha$ ]<sub>D</sub><sup>25</sup> +112.8 (c 0.1, MeOH); for NMR spectral data, see **Supplementary Table 10** and **Supplementary Fig. 38-43**; for MS/MS data, see **Supplementary Fig. 19**.

The fermentation culture of *S. cattleya* on MSF agar medium (125 plates, 80 mL/plate each) was

collected and extracted using organic solvent (CH<sub>2</sub>Cl<sub>2</sub>/MeOH 1:1, v/v, 10 L x 2 times). After removing the solvent in vacuo, the crude extract was redissolved in methanol and separated by Sephadex LH-20 (GE healthcare) column chromatography using methanol as eluent. The fractions with cattlemycins were collected and further separated on a Shimadzu semipreparative HPLC system. Compound **1d** was isolated using a YMC C18 column (250 mm × 10 mm, 5 μm, YMC) with gradient program as follows: 0-15 min, 5-100% B; 15-15.5 min, 100 % B; 15.5-16 min, 100-5% B; 16-21 min, 5% B, with a flow rate at 5 mL/min. A second round of purification was then performed for **1d** with isocratic 60% B with a YMC C18 column (250 mm × 10 mm, 5 μm, YMC) at 4 mL/min. Cattlemycin D (**1d**): white solid, 1.1 mg; [α]<sub>D</sub><sup>25</sup> +110.4 (c 0.1, MeOH); for NMR spectral data, see **Supplementary Table 10** and **Supplementary Fig. 44-49**; for MS/MS data, see **Supplementary Fig. 21**.

The fermentation culture of *S. cattleya* on MSF agar medium (180 plates, 80 mL/plate each) was collected and extracted using organic solvent (CH<sub>2</sub>Cl<sub>2</sub>/MeOH 1:1, v/v, 15 L x 2 times). After removing the solvent in vacuo, the crude extract was redissolved in methanol and separated by Sephadex LH-20 column chromatography using methanol as eluent. The fractions with butyrolactols were collected and further separated on an Agilent 1260 semipreparative HPLC system. Compounds **2a** and **2b** were isolated using a Shim-pack GIST C18 column (250 mm × 14 mm, 5 μm, Shimadzu) with gradient program as follows: 0-15 min, 5-100% B; 15-20 min, 100 % B; 20-20.1 min, 100-5% B; 20.1-25 min, 5% B, with a flow rate at 5 mL/min. A second round of purification was then performed for **2a** and **2b** with isocratic 70% and 60% B, respectively, with a YMC Triart Phenyl column (250 mm × 10 mm, 5 μm, YMC) at 4 mL/min. Butyrolactol A (**2a**): white solid, 1.0 mg; for NMR spectral data, see **Supplementary Table 11** and **Supplementary Fig. 50-55**; for MS/MS data, see **Supplementary Fig. 31**. Butyrolactol B (**2b**): white solid, 0.8 mg; for NMR spectral data, see **Supplementary Table 11** and **Supplementary Fig. 56-61**; for MS/MS data, see **Supplementary Fig. 32**.

Co-culture of *S. cattleya* with *Tsukamurella pulmonis* TP-B0596 (gifted by Dr. Hiroyasu Onaka) was performed by 500-mL flask containing 100 mL of A3M medium, with a total of 4 L volume. 3 mL of *S. cattleya* seed culture and 1 mL of *T. pulmonis* seed culture were simultaneously added. After fermentation for 7 days, the fermentation broth was centrifuged at 8000 rpm for 30 min, and the precipitate was extracted using organic solvent (CH<sub>2</sub>Cl<sub>2</sub>/MeOH 1:1, v/v, 1 L x 2 times). After removing the solvent in vacuo, the crude extract was redissolved in methanol and separated by Sephadex LH-20 column chromatography using methanol as eluent. The fractions containing **3a** was detected by HPLC-DAD-MS and then combined. The result compound was analyzed by NMR without further purification. Cattleyatetronate A (**3a**): brown solid, 10 mg; for NMR spectral data, see **Supplementary Table 12** and **Supplementary Fig. 62-67**; for MS/MS data, see **Supplementary Fig. 36**.

## The Python script for NegMDF screening.

# prepare the NegMDF window in a csv file

cattleyatetronate [C<sub>15</sub>H<sub>15</sub>O<sub>4</sub>]<sup>-</sup>, Odd, +[O]\*[0,3], +[CH<sub>2</sub>]\*[0,2], +[H<sub>2</sub>O]\*[-1,0], [2H]\*[0,2]

butyrolactol [C<sub>28</sub>H<sub>45</sub>O<sub>9</sub>]<sup>-</sup>, Odd, +[O]\*[-1,1], +[CH<sub>2</sub>]\*[-2,2], +[H<sub>2</sub>O]\*[-1,1], [2H]\*[-1,1]

cattlemycin [C<sub>36</sub>H<sub>52</sub>NO<sub>10</sub>]<sup>-</sup>, Even, +[O]\*[-2,2], +[CH<sub>2</sub>]\*[-2,2], +[H<sub>2</sub>O]\*[-1,1], [2H]\*[-1,1]

|   | A            | B        | C           | D        | E        | F        | G        | H        | I        | J        | K        | L        | M        | N        | O        | P        | Q       | R        | S        |
|---|--------------|----------|-------------|----------|----------|----------|----------|----------|----------|----------|----------|----------|----------|----------|----------|----------|---------|----------|----------|
| 1 | compound     | odd_even | initial mcr | change_1 | mcr_c1   | change_2 | mcr_c2   | change_3 | mcr_c3   | change_4 | mcr_c4   | change_5 | mcr_c5   | change_6 | mcr_c6   | change_7 | mcr_c7  | change_8 | mcr_c8   |
| 2 | cattetronate | 1        | 259.0976    | 3        | 15.99491 | 2        | 14.01565 | 1        | -18.0106 | 2        | 2.01565  |          |          |          |          |          |         |          |          |
| 3 | butyrolactol | 1        | 525.3069    | 1        | -15.9949 | 1        | 15.99491 | 2        | 14.01565 | 2        | -14.0157 | 1        | 18.01056 | 1        | -18.0106 | 1        | 2.01565 | 1        | -2.01565 |
| 4 | cattlemycin  | 0        | 658.3597    | 2        | -15.9949 | 2        | 15.99491 | 2        | 14.01565 | 2        | -14.0157 | 1        | 18.01056 | 1        | -18.0106 | 1        | 2.01565 | 1        | -2.01565 |

# prepare the ion list of the target strain culture in a csv file

Using the MSF culture of *S. cattleya* as an example, the initial ion list was exported by MZmine 3. The ions with peak area less than 2000 were removed for simplification. The ions from medium were removed by background subtraction. 828 ions were included in final csv file.

|    | A  | B  | C    | D        | E       |        |
|----|----|----|------|----------|---------|--------|
| 1  | id | rt | mz   | Integer  | decimal |        |
| 2  |    | 3  | 0.52 | 146.9385 | 146     | 0.9385 |
| 3  |    | 5  | 0.53 | 102.9487 | 102     | 0.9487 |
| 4  |    | 6  | 0.53 | 114.9886 | 114     | 0.9886 |
| 5  |    | 10 | 0.53 | 158.9785 | 158     | 0.9785 |
| 6  |    | 15 | 0.53 | 304.9086 | 304     | 0.9086 |
| 7  |    | 19 | 0.54 | 272.9586 | 272     | 0.9586 |
| 8  |    | 30 | 0.55 | 190.9281 | 190     | 0.9281 |
| 9  |    | 31 | 0.55 | 421.0277 | 421     | 0.0277 |
| 10 |    | 34 | 0.56 | 112.9854 | 112     | 0.9854 |
| 11 |    | 44 | 0.57 | 128.9593 | 128     | 0.9593 |
| 12 |    | 49 | 0.57 | 437.0016 | 437     | 0.0016 |
| 13 |    | 50 | 0.58 | 101.0054 | 101     | 0.0054 |

# run following Python script on PyCharm 2022.3 (Community Edition)

# extract target ions

```
import os
```

```
import csv
```

```
import numpy as np
```

```
from scipy.spatial import ConvexHull
```

```
from shapely.geometry import Point, Polygon, LineString
```

# extract sample data

```
def sample_data_generator(sample_path):
```

```
    sample_data = []
```

```
    with open(sample_path, 'r', newline="", encoding='utf-8-sig') as f:
```

```
        for row in f:
```

```
            if row.split(',')[0] == 'id':
```

```
                pass
```

```
            else:
```

```
                decimal = float(row.split(',')[4].strip())
```

```
                list_tem = [row.split(',')[0], row.split(',')[1], row.split(',')[2], int(row.split(',')[3]), decimal]
```

```
                sample_data.append(list_tem)
```

```
    return sample_data
```

# extract compound name

```
def compounds_name_generator(target_compound_path):
```

```
    compounds_name = []
```

```
    with open(target_compound_path, 'r', newline="", encoding='utf-8-sig') as f:
```

```
        for row in f:
```

```
            if row.split(',')[0] == 'compound':
```

```
                pass
```

```
            else:
```

```
                compounds_name.append(row.split(',')[0].strip())
```

```
    return compounds_name
```

# extract compound feature

```

def compounds_feature_generator(target_compound_path):
    with open(target_compound_path, 'r', newline="", encoding='utf-8-sig') as f:
        compounds_feature = {}
        for row in f:
            compound_feature = []
            if row.split(',')[0] == 'compound':
                pass
            else:
                i = 3
                while i+1 < len(row.split(',')):
                    if row.split(',')[i].strip() == "":
                        break
                    else:
                        compound_feature.append([int(row.split(',')[i].strip()), float(row.split(',')[i+1].strip())])
                    i += 2
                compounds_feature[(float(row.split(',')[2]), row.split(',')[1])] = compound_feature
        return compounds_feature

```

# generate data for convex hull

```

def hull_data_generator(initial_mcr, compound):
    compound_arrays = []
    for array in compound:
        new_array = []
        for i in range(array[0]+1):
            new_array.append(i * array[1])
        compound_arrays.append(new_array)
    cartesian_product = [[]]
    for array in compound_arrays:
        new_result = []
        for x in cartesian_product:
            for y in array:
                new_result.append(x + [y])
        cartesian_product = new_result
    hull_data = []
    for item in cartesian_product:
        mcr = initial_mcr
        for num in item:
            mcr += num
        hull_data.append([int(mcr), mcr - int(mcr)])
    return hull_data

```

# screen for each compound

```

def single_screening(compound_feature, sample_data, tolerance=2e-2):
    for key in compound_feature:

```

```

sample_data_screening = [['id', 'rt', 'mz', 'Integer', 'decimal']]
hull_data = hull_data_generator(key[0], compound_feature[key])
hull_array = np.array(hull_data)
hull = ConvexHull(hull_array)
convex_hull_points = hull_array[hull.vertices]
convex_hull_polygon = Polygon(convex_hull_points)
for point in sample_data:
    if int(point[3] % 2) == int(key[1]):
        test_point = Point(point[3], point[4])
        test_point_shapely = Point(test_point)
        is_inside = convex_hull_polygon.contains(test_point)
        is_touching_edge = convex_hull_polygon.touches(test_point)
        if is_inside:
            sample_data_screening.append(point)
        elif is_touching_edge:
            sample_data_screening.append(point)
        else:
            check = 0
            convex_hull_vertices = np.array(convex_hull_points)
            for i in range(len(convex_hull_vertices)):
                p1 = convex_hull_vertices[i]
                p2 = convex_hull_vertices[(i + 1) % len(convex_hull_vertices)]
                line = LineString([p1, p2])
                distance = test_point_shapely.distance(line)
                if distance < tolerance:
                    check = 1
                    break
            if check == 1:
                sample_data_screening.append(point)
return sample_data_screening

```

# screen for compounds

```

def multiple_screening(sample_path, compounds_feature_path):
    compounds_name = compounds_name_generator(compounds_feature_path)
    compounds_feature = compounds_feature_generator(compounds_feature_path)
    for root, dirs, files in os.walk(sample_path):
        for file in files:
            file_path = os.path.join(root, file)
            screening_result = []
            if 'new' in file_path:
                sample_points = sample_data_generator(file_path)
                i = 0
                for key in compounds_feature:
                    screening_result.append([compounds_name[i]])

```

```
screening_result += single_screening({key: compounds_feature[key]}, sample_points)
i += 1
screening_result_path = file_path.strip('_new.csv') + '_' + f'{compounds_name}' + '.csv'
with open(screening_result_path, 'w', newline="", encoding='utf-8') as f:
    writer = csv.writer(f)
    for row in screening_result:
        writer.writerow(row)
```

## Supplementary Reference

- 1 Kempf, A. J. *et al.* L-681, 217, a new and novel member of the efrotomycin family of antibiotics. *The Journal of Antibiotics* **39**, 1361-1367 (1986).
- 2 Sugai, S., Komaki, H., Hemmi, H. & Kodani, S. Isolation and structural determination of a new antibacterial compound demethyl-L-681,217 from *Streptomyces cattleya*. *The Journal of Antibiotics* **69**, 839-842 (2016).
- 3 Wang, B., Guo, F., Dong, S.-H. & Zhao, H. Activation of silent biosynthetic gene clusters using transcription factor decoys. *Nature Chemical Biology* **15**, 111-114 (2019).
- 4 Demarque, D. P., Crotti, A. E., Vessechi, R., Lopes, J. L. & Lopes, N. P. Fragmentation reactions using electrospray ionization mass spectrometry: an important tool for the structural elucidation and characterization of synthetic and natural products. *Natural Product Reports* **33**, 432-455 (2016).
- 5 Fonseca, T., Lopes, N. P., Gates, P. J. & Staunton, J. Fragmentation studies on tetronasin by accurate-mass electrospray tandem mass spectrometry. *Journal of the American Society for Mass Spectrometry* **15**, 325-335 (2004).
- 6 Kanchanabancha, C. *et al.* Unusual acetylation–elimination in the formation of tetronate antibiotics. *Angewandte Chemie* **125**, 5897-5900 (2013).
- 7 Xiang, C., Yao, S., Wang, R., & Zhang, L., Bioinformatic prediction of the stereoselectivity of modular polyketide synthase: an update of the sequence motifs in ketoreductase domain. *Beilstein J. Org. Chem.* **20**, 1476–1485 (2024).
- 8 Dolle, R. E. and Nicolaou, K. C. Total synthesis of elfamycins: aurodox and efrotomycin. 2. Coupling of key intermediates and completion of the synthesis. *J. Am. Chem. Soc.* **106**, 1695–1698 (1985).

# Supplementary Dataset 1.

## MS/MS database of bacterial T1PKs.

### Part 1. MS/MS data from references

222 compounds from 59 references were collected here. Red and blue line represent proposed fragmentation pathways in +ESI and -ESI modes, respectively.

C-O cleavage, the most common MS/MS fragmentation for T1PKs, predominantly occurs through a  $\beta$ -elimination mechanism in most cases. In this table, it is recorded according to its elimination type, including  $\beta$ -elimination of hydroxy ( $\beta$ EH), methoxy ( $\beta$ EM), ester ( $\beta$ EE), ether ( $\beta$ EO), glycosyl ( $\beta$ EG), sulfonic acid ( $\beta$ ES), phosphoric acid ( $\beta$ EP), halogen ( $\beta$ EX). The  $\beta$ EH elimination can occur at any hydroxyl group in the structure and is therefore not labeled on the structure

The  $\alpha$ -cleavage includes the elimination of hydroxy ( $\alpha$ EH), ketone ( $\alpha$ EK), carboxyl ( $\alpha$ EC), and other oxo-group ( $\alpha$ EO, including epoxy, ether, methoxy). For 3-hydroxy ketone moiety,  $\alpha$ -cleavage is performed as retro-aldol elimination ( $\alpha$ E-RA),

Other CID cleavage reaction recorded in this table includes amide cleavage (**Amide**), Retro-Diels-Alder reaction (**RDA**), and allyl cleavage of **polyene** moiety.

| No.        | Compounds and Observed cleavages                                                                                                                     | Representatives Structure and proposed fragmentation                                                                   | Ion source | [Ref.] Data Location    |
|------------|------------------------------------------------------------------------------------------------------------------------------------------------------|------------------------------------------------------------------------------------------------------------------------|------------|-------------------------|
| r1-r7      | premonensins A, B, Bu, Prg, All, Pr, Cl<br>$\beta$ EH, $\beta$ EE<br>$\alpha$ EH, $\alpha$ EK, $\alpha$ EC, $\alpha$ E-RA<br>Polyene                 | 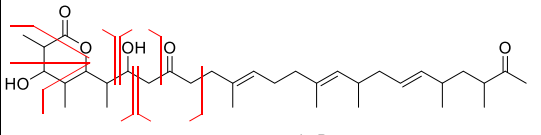<br>premonensin B                  | +ESI       | [1]<br>FigS16<br>FigS42 |
| r8<br>r9   | premonensin M10 <sub>A</sub><br>premonensin M10 <sub>B</sub><br>$\beta$ EH<br>$\alpha$ EC, $\alpha$ E-RA                                             | <br>premonensin M10 <sub>B</sub>   | +ESI       | [1]<br>FigS19           |
| r10<br>r11 | premonensin M11 <sub>A</sub><br>premonensin M11 <sub>B</sub><br>$\alpha$ EK, $\alpha$ EO                                                             | <br>premonensin M11 <sub>B</sub>   | +ESI       | [1]<br>FigS20           |
| r12<br>r13 | premonensin M12 <sub>A</sub><br>premonensin M12 <sub>B</sub><br>$\beta$ EH<br>$\alpha$ EH, $\alpha$ EC, $\alpha$ E-RA                                | <br>premonensin M12 <sub>B</sub>   | +ESI       | [1]<br>FigS21           |
| r14<br>r15 | ER2 <sup>0</sup> -premonensin A<br>ER2 <sup>0</sup> -premonensin B<br>$\beta$ EH, $\beta$ EE<br>$\alpha$ EH, $\alpha$ EK, $\alpha$ EC, $\alpha$ E-RA | <br>ER2 <sup>0</sup> premonensin B | +ESI       | [1]<br>FigS23           |
| r16<br>r17 | ER6 <sup>0</sup> -premonensin A<br>ER6 <sup>0</sup> -premonensin B<br>$\beta$ EH, $\beta$ EE<br>$\alpha$ EH, $\alpha$ E-RA<br>Polyene                | <br>ER6 <sup>0</sup> premonensin B | +ESI       | [1]<br>FigS25           |

|            |                                                                                                                                       |                                                    |             |               |
|------------|---------------------------------------------------------------------------------------------------------------------------------------|----------------------------------------------------|-------------|---------------|
| r18<br>r19 | ER8 <sup>0</sup> -premonensin A<br>ER8 <sup>0</sup> -premonensin B<br><b>βEE</b><br><b>αEH, αEK, αE-RA</b><br><b>Polyene</b>          | <br>ER8 <sup>0</sup> premonensin B                 | <b>+ESI</b> | [1]<br>FigS26 |
| r20<br>r21 | KR4 <sup>0</sup> -premonensin A<br>KR4 <sup>0</sup> -premonensin B<br><b>αE-RA</b>                                                    | <br>KR4 <sup>0</sup> premonensin B                 | <b>+ESI</b> | [1]<br>FigS27 |
| r22<br>r23 | KR6 <sup>0</sup> -premonensin A<br>KR6 <sup>0</sup> -premonensin B<br><b>βEH, βEE</b><br><b>αEH, αEK, αE-RA</b>                       | <br>KR6 <sup>0</sup> premonensin B                 | <b>+ESI</b> | [1]<br>FigS28 |
| r24<br>r25 | KR11 <sup>0</sup> -premonensin A<br>KR11 <sup>0</sup> -premonensin B<br><b>βEH</b><br><b>αEC, αE-RA</b>                               | <br>KR11 <sup>0</sup> premonensin B                | <b>+ESI</b> | [1]<br>FigS29 |
| r26<br>r27 | KR12 <sup>0</sup> -premonensin A<br>KR12 <sup>0</sup> -premonensin B<br><b>βEE</b><br><b>αEH, αEK, αE-RA</b>                          | <br>KR12 <sup>0</sup> premonensin B                | <b>+ESI</b> | [1]<br>FigS30 |
| r28<br>r29 | KR11 <sup>0</sup> -premonensin M11 <sub>A</sub><br>KR11 <sup>0</sup> -premonensin M11 <sub>B</sub><br><b>αE-RA</b>                    | <br>KR11 <sup>0</sup> premonensin M11 <sub>B</sub> | <b>+ESI</b> | [1]<br>FigS32 |
| r30<br>r31 | KR12 <sup>0</sup> -premonensin M12 <sub>A</sub><br>KR12 <sup>0</sup> -premonensin M12 <sub>B</sub><br><b>βEH</b><br><b>αEH, αE-RA</b> | <br>KR12 <sup>0</sup> premonensin M12 <sub>B</sub> | <b>+ESI</b> | [1]<br>FigS33 |
| r32<br>r33 | DH2 <sup>0</sup> -premonensin A<br>DH2 <sup>0</sup> -premonensin B<br><b>αEH, αEK, αE-RA</b>                                          | <br>DH2 <sup>0</sup> premonensin B                 | <b>+ESI</b> | [1]<br>FigS34 |
| r34<br>r35 | DH4 <sup>0</sup> -premonensin A<br>DH4 <sup>0</sup> -premonensin B<br><b>αE-RA</b>                                                    | <br>DH4 <sup>0</sup> premonensin B                 | <b>+ESI</b> | [1]<br>FigS35 |
| r36        | DH5 <sup>0</sup> -premonensin B<br><b>βEE</b><br><b>αEH, αE-RA</b>                                                                    | <br>DH5 <sup>0</sup> premonensin B                 | <b>+ESI</b> | [1]<br>FigS36 |
| r37<br>r38 | DH7 <sup>0</sup> -premonensin A<br>DH7 <sup>0</sup> -premonensin B<br><b>βEH</b><br><b>αE-RA</b>                                      | <br>DH7 <sup>0</sup> premonensin B                 | <b>+ESI</b> | [1]<br>FigS37 |
| r39<br>r40 | DH8 <sup>0</sup> -premonensin A<br>DH8 <sup>0</sup> -premonensin B<br><b>αE-RA</b>                                                    | <br>DH8 <sup>0</sup> premonensin B                 | <b>+ESI</b> | [1]<br>FigS38 |



|                     |                                                                                                                       |                                                                                                                  |             |                                              |
|---------------------|-----------------------------------------------------------------------------------------------------------------------|------------------------------------------------------------------------------------------------------------------|-------------|----------------------------------------------|
| <b>r41-<br/>r57</b> | <p>piercidins A1 and 16 analogues</p> <p><math>\beta</math>EH<br/><math>\alpha</math>EH<br/>Polyene</p>               | 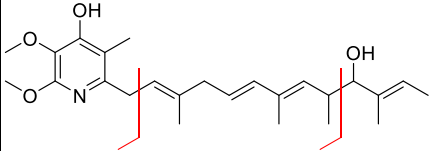 <p>piercidin A1</p>            | <b>+ESI</b> | [2]<br>DatasetS1<br>No.4, 6, 8-14, 16, 19-25 |
| <b>r58-<br/>r63</b> | <p>piercidins B1 and 5 analogues</p> <p><math>\beta</math>EM<br/>Polyene</p>                                          |  <p>piercidin B1</p>            | <b>+ESI</b> | [2]<br>DatasetS1<br>No. 5, 7, 15, 17, 18, 26 |
| <b>r64-<br/>r70</b> | <p>glucopiercidin A1a and 6 glycosyl piercidins</p> <p><math>\beta</math>EG<br/><math>\alpha</math>EO<br/>Polyene</p> |  <p>glucopiercidin A1a</p>     | <b>+ESI</b> | [2]<br>DatasetS1<br>No. 28-33, 35            |
| <b>r71</b>          | <p>phospho-piercidin A1</p> <p><math>\beta</math>EP<br/><math>\alpha</math>EO<br/>Polyene</p>                         |  <p>phospho-piercidin A1</p>    | <b>+ESI</b> | [2]<br>DatasetS1<br>No. 34                   |
| <b>r72</b>          | <p>mer-A2026-0</p> <p><math>\alpha</math>EH<br/>Polyene</p>                                                           |  <p>mer-A2026-0</p>           | <b>+ESI</b> | [2]<br>DatasetS1<br>No.41                    |
| <b>r73-<br/>r74</b> | <p>10-MeO-mer-A2026-0<br/>10-MeO-mer-A2026-B</p> <p><math>\beta</math>EM<br/><math>\alpha</math>EO<br/>Polyene</p>    |  <p>10-MeO-mer-A2026-0</p>    | <b>+ESI</b> | [2]<br>DatasetS1<br>No.42-43                 |
| <b>r75</b>          | <p>actinopyrone A</p> <p>Polyene</p>                                                                                  |  <p>actinopyrone A</p>        | <b>+ESI</b> | [2]<br>DatasetS1<br>No.46                    |
| <b>r76<br/>r77</b>  | <p>10-MeO-actinopyrone A<br/>10-MeO-actinopyrone B</p> <p><math>\beta</math>EM<br/>Polyene</p>                        |  <p>10-MeO-actinopyrone A</p> | <b>+ESI</b> | [2]<br>DatasetS1<br>No.47-48                 |

|                                  |                                                                                                          |                                                                                                                                     |             |                                       |
|----------------------------------|----------------------------------------------------------------------------------------------------------|-------------------------------------------------------------------------------------------------------------------------------------|-------------|---------------------------------------|
| <p><b>r78</b><br/><b>r79</b></p> | <p>bongkreic acid and<br/>deoxybongkreic acid<br/><b>βEM</b><br/><b>αEC</b></p>                          | 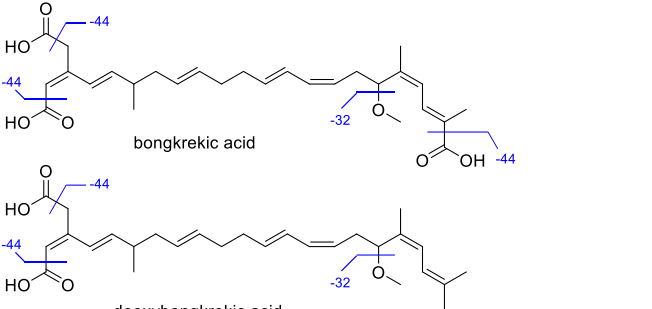 <p>bongkreic acid</p> <p>deoxybongkreic acid</p> | <p>-ESI</p> | <p>[3]<br/>FigS3</p>                  |
| <p><b>r80-<br/>r84</b></p>       | <p>lagunapyrones A-E<br/><b>βEH</b><br/><b>αEH</b></p>                                                   |  <p>lagunapyrone A</p>                            | <p>+ESI</p> | <p>[4]<br/>FigS6</p>                  |
| <p><b>r85-<br/>r87</b></p>       | <p>fulvuthiacenes A-C<br/><b>βEM</b></p>                                                                 |  <p>fulvuthiacene A</p>                           | <p>+ESI</p> | <p>[5]<br/>Fig2</p>                   |
| <p><b>r88<br/>r89</b></p>        | <p>malyngamide I<br/>malyngamide C<br/><b>βEX</b><br/><b>Amide</b></p>                                   |  <p>malyngamide I</p>                            | <p>+ESI</p> | <p>[6]<br/>FigS1/S6</p>               |
| <p><b>r90<br/>r91</b></p>        | <p>malyngamide C acetate<br/>N-methyl malyngamide C<br/>acetate<br/><b>βEX, βEE</b><br/><b>Amide</b></p> |  <p>malyngamide C acetate</p>                   | <p>+ESI</p> | <p>[6]<br/>FigS1/S6</p>               |
| <p><b>r92-<br/>r94</b></p>       | <p>azabicyclenes B-D<br/><b>Amide</b></p>                                                                |  <p>azabicyclene A</p>                          | <p>+ESI</p> | <p>[7]<br/>Extended<br/>Data Fig2</p> |
| <p><b>r95</b></p>                | <p>pellasoren A<br/><b>αEO</b><br/><b>Amide, Polyene</b></p>                                             |  <p>pellasoren A</p>                            | <p>+ESI</p> | <p>[8]<br/>FigS3</p>                  |
| <p><b>r96-<br/>r98</b></p>       | <p>aurantinins B-D<br/><b>βEH, βEG</b><br/><b>Polyene</b></p>                                            |  <p>aurantinin B</p>                            | <p>+ESI</p> | <p>[9]<br/>Fig4</p>                   |

|             |                                                                              |                                                                                                                  |      |                                        |
|-------------|------------------------------------------------------------------------------|------------------------------------------------------------------------------------------------------------------|------|----------------------------------------|
| <b>r99</b>  | spectinabilin<br>$\beta$ EM, $\beta$ EO<br>$\alpha$ EO<br>Polyene            | 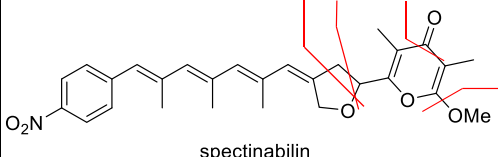<br>spectinabilin              | +ESI | [10]<br>FigS7                          |
| <b>r100</b> | tetronate intermediate 4<br>$\alpha$ EK                                      | <br>tetronate intermediate 4    | +ESI | [11]<br>Fig4                           |
| <b>r101</b> | agglomerin A<br>$\beta$ EH<br>$\alpha$ EK                                    | <br>agglomerin A                | -ESI | [12]<br>FigS11<br>FigS12               |
| <b>r102</b> | hydroxy-agglomerin A<br>$\alpha$ EK, $\alpha$ EH                             | <br>hydroxy-agglomerin A        | -ESI | [12]<br>FigS11<br>FigS12               |
| <b>r103</b> | acetyl-agglomerin A<br>$\beta$ EE<br>$\alpha$ EK                             | <br>acetyl-agglomerin A         | -ESI | [12]<br>FigS11<br>FigS12               |
| <b>r104</b> | tetrocarcin A<br>$\beta$ EG                                                  | <br>tetrocarcin A            | +ESI | [13]<br>FigS1<br>TableS1               |
| <b>r105</b> | tetronasin<br>$\beta$ EH, $\beta$ EM, $\beta$ EO<br>$\alpha$ EK, $\alpha$ EO | <br>tetronasin                | +ESI | [14]<br>Full text<br><br>[15]<br>FigS9 |
| <b>r106</b> | tetronasin intermediate 3<br>$\beta$ EH, $\beta$ EM                          | <br>tetronasin intermediate 3 | +ESI | [15]<br>FigS9                          |

|      |                                                                                            |                                                                                                                                                 |      |                |
|------|--------------------------------------------------------------------------------------------|-------------------------------------------------------------------------------------------------------------------------------------------------|------|----------------|
| r107 | tetronasin intermediate 4<br>$\beta$ EH, $\beta$ EM                                        | 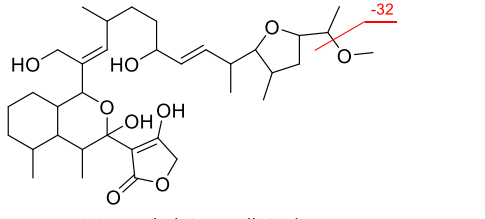 <p style="text-align: center;">tetronasin intermediate 4</p> | +ESI | [15]<br>FigS13 |
| r108 | nocamycin I<br>$\beta$ EH, $\beta$ EM, $\beta$ EO<br>$\alpha$ EK, $\alpha$ EO              |  <p style="text-align: center;">nocamycin I</p>               | +ESI | [16]<br>FigS1  |
| r109 | nocamycin V<br>$\beta$ EH, $\beta$ EM, $\beta$ EO<br>$\alpha$ EK, $\alpha$ EH, $\alpha$ EO |  <p style="text-align: center;">nocamycin V</p>               | +ESI | [17]<br>FigS1  |
| r110 | lydicamycin<br>$\beta$ EH<br>$\alpha$ EH                                                   |  <p style="text-align: center;">lydicamycin</p>              | +ESI | [18]<br>FigS4  |
| r111 | 30-demethyllydicamycin<br>$\beta$ EH<br>$\alpha$ EH                                        |  <p style="text-align: center;">30-demethyllydicamycin</p>  | +ESI | [19]<br>FigS6  |
| r112 | maduramicin<br>$\beta$ EG, $\beta$ EM<br>$\alpha$ EC                                       |  <p style="text-align: center;">maduramicin</p>             | +ESI | [20]<br>Fig1   |
| r113 | octacyclomycin<br>$\beta$ EH, $\beta$ EG<br>$\alpha$ EC                                    |  <p style="text-align: center;">octacyclomycin</p>          | +ESI | [21]<br>FigS15 |

|                       |                                                                                                     |                                                                                                                                               |      |                            |
|-----------------------|-----------------------------------------------------------------------------------------------------|-----------------------------------------------------------------------------------------------------------------------------------------------|------|----------------------------|
| <b>r114</b>           | $\alpha$ -770<br>$\beta$ EH, $\beta$ EE, $\beta$ EO<br>$\alpha$ EO                                  | 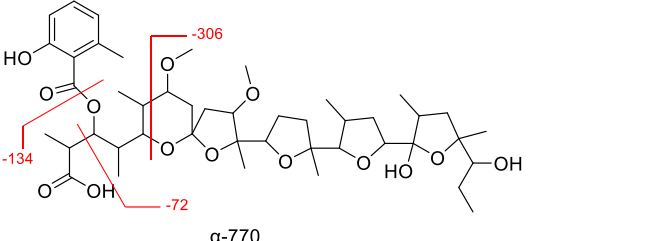 <p style="text-align: center;"><math>\alpha</math>-770</p> | +ESI | [21]<br>Fig5               |
| <b>r115</b>           | $\alpha$ -823<br>$\beta$ EH, $\beta$ EG, $\beta$ EM, $\beta$ EO<br>$\alpha$ EC, $\alpha$ EO         |  <p style="text-align: center;"><math>\alpha</math>-823</p> | +ESI | [21]<br>Fig3               |
| <b>r116-<br/>r123</b> | nonactin and 7 analogues<br>$\beta$ EE                                                              |  <p style="text-align: center;">nonactin</p>                | +ESI | [22]<br>Full text          |
| <b>r124<br/>r125</b>  | lasalocid A<br>iso-lasalocid A<br>$\beta$ EH, $\beta$ EO<br>$\alpha$ EC, $\alpha$ EH, $\alpha$ E-RA |  <p style="text-align: center;">lasalocid A</p>           | +ESI | [23]<br>Fig2/3             |
| <b>r126<br/>r127</b>  | monensin A<br>monensin B<br>$\beta$ EH, $\beta$ EO<br>$\alpha$ EH                                   |  <p style="text-align: center;">monensin A</p>            | +ESI | [24]<br>Full text          |
| <b>r128<br/>r129</b>  | nanchangmycin and 1<br>analogue<br>$\beta$ EH, $\beta$ EG, $\beta$ EO<br>$\alpha$ EH                |  <p style="text-align: center;">nanchangmycin</p>         | +ESI | [25]<br>TableS2<br>TableS3 |

|                            |                                                                              |                                                                                                                   |        |                    |
|----------------------------|------------------------------------------------------------------------------|-------------------------------------------------------------------------------------------------------------------|--------|--------------------|
| <b>r130</b>                | nigericin<br>$\beta$ EH, $\beta$ EM<br>$\alpha$ EC                           | 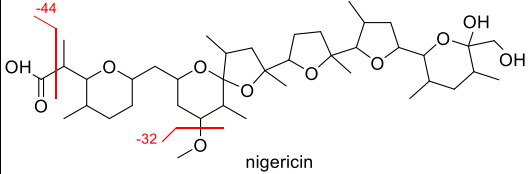<br>nigericin                   | +ESI   | [26]<br>FigS3      |
| <b>r131</b>                | streptimidone<br>$\beta$ EH<br>$\alpha$ EK, $\alpha$ E-RA<br>Amide           | <br>streptimidone                | +ESI   | [27]<br>FigS2      |
| <b>r132</b>                | streptimidone analogue 2<br>$\beta$ EH<br>$\alpha$ EK<br>Amide               | <br>streptimidone analogue 2     | +ESI   | [27]<br>FigS2      |
| <b>r133</b>                | streptimidone analogue 3<br>$\beta$ EH<br>Amide                              | <br>streptimidone analogue 3     | +ESI   | [27]<br>FigS2      |
| <b>r134</b>                | streptimidone analogue 4<br>$\beta$ EH<br>$\alpha$ EK<br>Amide               | <br>streptimidone analogue 4    | +ESI   | [27]<br>FigS2      |
| <b>r135</b>                | streptimidone analogue 5<br>$\beta$ EH, $\beta$ EM<br>$\alpha$ EK            | <br>streptimidone analogue 5   | +ESI   | [27]<br>FigS2      |
| <b>r136</b><br><b>r137</b> | gladiofungin A<br>gladiofungin B<br>$\beta$ EH<br>$\alpha$ EC, $\alpha$ E-RA | <br>gladiofungin A            | -ESI   | [28]<br>FigS14/S15 |
| <b>r138</b>                | lacunalide A methyl ester<br>$\beta$ EH, $\alpha$ EH, Polyene                | <br>lacunalide A methyl ester | +MALDI | [29]<br>FigS12     |
| <b>r139</b>                | linearmycin A<br>$\beta$ EH, $\alpha$ EH, $\alpha$ E-RA, Polyene             |                               | +ESI   | [30]<br>FigS4      |

|                                                                                                                                                  |                          |                                                      |              |                               |
|--------------------------------------------------------------------------------------------------------------------------------------------------|--------------------------|------------------------------------------------------|--------------|-------------------------------|
| 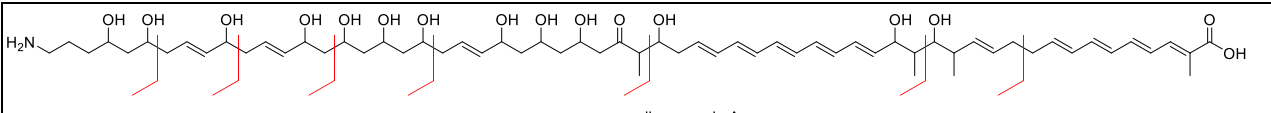 <p style="text-align: center;">linearmycin A</p>              |                          |                                                      |              |                               |
| <b>r140</b>                                                                                                                                      | linearmycin B            | $\beta$ EH, $\alpha$ EH, $\alpha$ E-RA, Polyene      | +ESI         | [31]<br>FigS9/S10             |
|  <p style="text-align: center;">linearmycin B</p>              |                          |                                                      |              |                               |
| <b>r141</b>                                                                                                                                      | neomediomycin B          | $\beta$ EH, $\alpha$ EH, $\alpha$ E-RA               | +ESI<br>-ESI | [32]<br>FigS2                 |
|  <p style="text-align: center;">neomediomycin B</p>            |                          |                                                      |              |                               |
| <b>r142</b>                                                                                                                                      | desulfoclethramycin      | $\beta$ EH, $\alpha$ EH, $\alpha$ E-RA, Polyene      | +ESI         | [33]<br>FigS6                 |
|  <p style="text-align: center;">desulfoclethramycin</p>        |                          |                                                      |              |                               |
| <b>r143</b>                                                                                                                                      | funisamine               | $\beta$ EH, $\beta$ ES<br>$\alpha$ EH, $\alpha$ E-RA | -ESI         | [34]<br>FigS43/S44<br>TableS6 |
|  <p style="text-align: center;">funisamine</p>               |                          |                                                      |              |                               |
| <b>r144</b>                                                                                                                                      | inha-neotetrafrabricin A | $\beta$ EH, $\beta$ EG                               | -ESI         | [35]<br>FigS4                 |
|  <p style="text-align: center;">inha-neotetrafrabricin A</p> |                          |                                                      |              |                               |

|                            |                                                                                   |                                                                                                                                         |             |               |
|----------------------------|-----------------------------------------------------------------------------------|-----------------------------------------------------------------------------------------------------------------------------------------|-------------|---------------|
| <b>r145</b>                | azalomycin F3a<br>$\beta$ EH<br>$\alpha$ EC                                       | 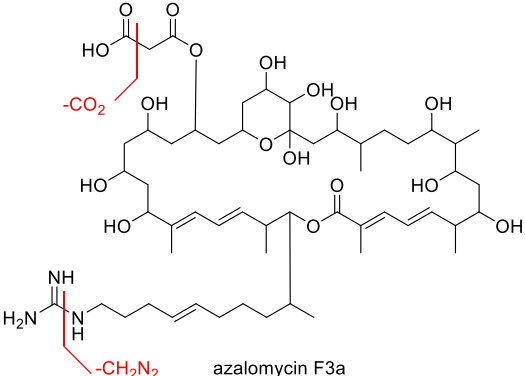 <p style="text-align: center;">azalomycin F3a</p>    | <b>+ESI</b> | [33]<br>FigS6 |
| <b>r146</b>                | azalomycin F4a<br>$\beta$ EH<br>$\alpha$ EC                                       |  <p style="text-align: center;">azalomycin F4a</p>    | <b>+ESI</b> | [36]<br>FigS7 |
| <b>r147</b><br><b>r148</b> | primycin A<br>deguanidino-amino-primycin A<br>$\beta$ EH, $\beta$ EG              |  <p style="text-align: center;">primycin A</p>       | <b>+ESI</b> | [36]<br>FigS5 |
| <b>r149</b><br><b>r150</b> | kanchanamycin C<br>deguanidino-amino-kanchanamycin C<br>$\beta$ EH<br>$\alpha$ EC |  <p style="text-align: center;">kanchanamycin C</p> | <b>+ESI</b> | [36]<br>FigS6 |



|                                    |                                                                                                                         |                                                                                                                            |             |                            |
|------------------------------------|-------------------------------------------------------------------------------------------------------------------------|----------------------------------------------------------------------------------------------------------------------------|-------------|----------------------------|
| <p><b>r151</b><br/><b>r152</b></p> | <p>desertomycin A<br/>desertomycin B</p> <p><math>\beta</math>EH, <math>\beta</math>EG</p>                              | 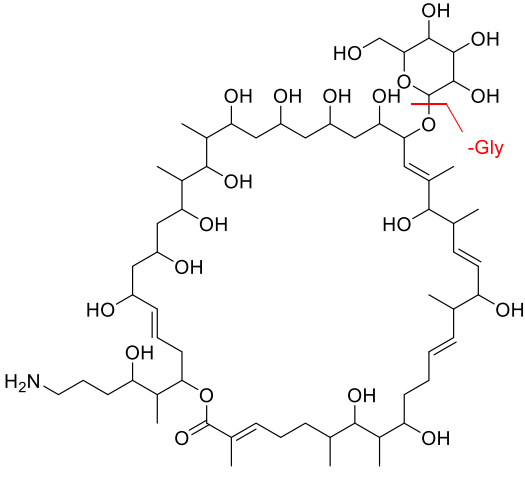 <p>desertomycin A</p>                   | <p>+ESI</p> | <p>[36]<br/>FigS4</p>      |
| <p><b>r153</b></p>                 | <p>galbonolide A</p> <p><math>\beta</math>EH, <math>\beta</math>EE<br/><math>\alpha</math>EC, <math>\alpha</math>EH</p> |  <p>galbonolide A</p>                     | <p>+ESI</p> | <p>[37]<br/>Fig4</p>       |
| <p><b>r154</b></p>                 | <p>galbonolide B</p> <p><math>\beta</math>EH, <math>\beta</math>EE<br/><math>\alpha</math>EC, <math>\alpha</math>EH</p> |  <p>galbonolide B</p>                    | <p>+ESI</p> | <p>[37]<br/>Fig4</p>       |
| <p><b>r155</b></p>                 | <p>galbonolide C</p> <p><math>\beta</math>EE<br/><math>\alpha</math>EC, <math>\alpha</math>EO</p>                       |  <p>galbonolide C</p>                   | <p>+ESI</p> | <p>[37]<br/>Fig4</p>       |
| <p><b>r156-<br/>r159</b></p>       | <p>stambomycin shunt<br/>metabolites 9-12</p> <p><math>\alpha</math>EC</p>                                              |  <p>stambomycin shunt metabolite 9</p> | <p>-ESI</p> | <p>[38]<br/>FigS13/S14</p> |
| <p><b>r160</b></p>                 | <p>oocydin A</p> <p><math>\beta</math>EE<br/><math>\alpha</math>EC</p>                                                  |  <p>oocydin A</p>                       | <p>+ESI</p> | <p>[39]<br/>FigS2</p>      |

|                       |                                                                              |                                                                                                            |             |                 |
|-----------------------|------------------------------------------------------------------------------|------------------------------------------------------------------------------------------------------------|-------------|-----------------|
| <b>r161-<br/>r165</b> | Cmc-thuggacin A and 4 analogues<br>$\beta$ EH<br>$\alpha$ EH                 | 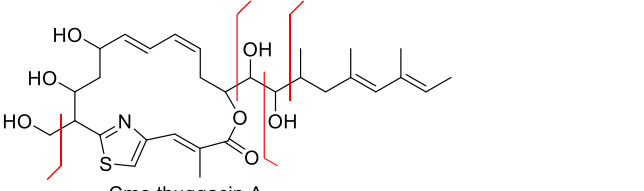 <p>Cmc-thuggacin A</p>  | <b>+ESI</b> | [40]<br>Fig5/S5 |
| <b>r166</b>           | JBIR-100<br>$\beta$ EM, $\beta$ EE<br>$\alpha$ EH                            |  <p>JBIR-100</p>         | <b>+ESI</b> | [41]<br>Fig2    |
| <b>r167</b>           | actinoallolide A<br>$\beta$ EH<br>$\alpha$ EH, $\alpha$ E-RA                 |  <p>actinoallolide A</p> | <b>+ESI</b> | [42]<br>FigS6   |
| <b>r168-<br/>r172</b> | misakinolide A and 4 analogues<br>$\beta$ EH, $\beta$ EE<br>RDA              |  <p>misakinolide A</p>  | <b>+ESI</b> | [43]<br>FigS8   |
| <b>r173-<br/>r178</b> | swinholide A and 5 analogues<br>$\beta$ EH, $\beta$ EE<br>$\alpha$ EH<br>RDA |  <p>swinholide A</p>   | <b>+ESI</b> | [44]<br>Fig2/S3 |

|                                                    |                                                                                                    |                                                                                                             |                                    |                                    |
|----------------------------------------------------|----------------------------------------------------------------------------------------------------|-------------------------------------------------------------------------------------------------------------|------------------------------------|------------------------------------|
| <p><b>r179</b><br/><b>r180</b><br/><b>r181</b></p> | <p>necroxime A<br/>necroxime B<br/>necroxime D<br/><b>βEH</b><br/><b>Amide</b></p>                 | 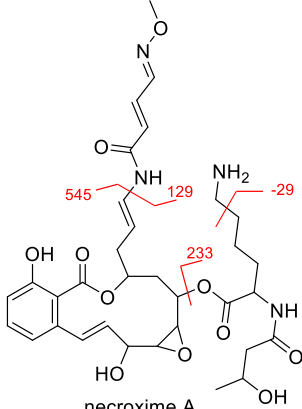 <p>necroxime A</p>        | <p><b>+ESI</b></p>                 | <p>[45]<br/>FigS8/<br/>S11/S13</p> |
| <p><b>r182</b></p>                                 | <p>necroxime C<br/><b>βEH</b><br/><b>Amide</b><br/><br/>βEH, βEE, βEM<br/>αEH<br/><b>Amide</b></p> |  <p>necroxime C</p>        | <p><b>+ESI</b><br/><b>-ESI</b></p> | <p>[45]<br/>FigS10/S12</p>         |
| <p><b>r183</b></p>                                 | <p>oximidine III<br/><br/>βEH, βEE, βEM<br/>αEH, αEC, αEO<br/><b>Amide</b></p>                     |  <p>oximidine III</p>    | <p><b>-ESI</b></p>                 | <p>[45]<br/>FigS9</p>              |
| <p><b>r184</b></p>                                 | <p>everninomicin N<br/><b>βEH, βEG</b></p>                                                         |  <p>everninomicin N</p> | <p><b>+ESI</b></p>                 | <p>[46]<br/>FigS3</p>              |

|                                          |                                                                                                       |                                                                                                           |             |                  |
|------------------------------------------|-------------------------------------------------------------------------------------------------------|-----------------------------------------------------------------------------------------------------------|-------------|------------------|
| <b>r185</b>                              | lucensomycin<br>$\beta$ EH, $\beta$ EG<br>$\alpha$ EC                                                 | 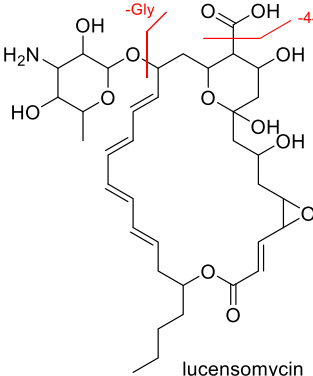 <p>lucensomycin</p>     | <b>+ESI</b> | [47]<br>FigS6    |
| <b>s5</b><br><b>r186-</b><br><b>r193</b> | rapamycin<br>8 rapamycin derivatives<br>$\beta$ EH, $\beta$ EE<br>$\alpha$ EO, $\alpha$ E-RA<br>Amide |  <p>rapamycin</p>        | <b>+ESI</b> | [48]<br>FigS4/S8 |
| <b>r194</b>                              | tartrolon E<br>$\beta$ EE<br>$\alpha$ EC, $\alpha$ EO, $\alpha$ E-RA                                  |  <p>tartrolon E</p>     | <b>+ESI</b> | [49]<br>FigS2    |
| <b>r195</b>                              | tartrolon D<br>$\beta$ EE<br>$\alpha$ EC, $\alpha$ EO, $\alpha$ E-RA                                  |  <p>tartrolon D</p>    | <b>+ESI</b> | [49]<br>FigS2    |
| <b>r196</b>                              | tripartilactam<br>$\beta$ EH<br>$\alpha$ EH, $\alpha$ EK                                              |  <p>tripartilactam</p> | <b>+ESI</b> | [50]<br>Fig4     |

|               |                                                 |                                                                                                               |      |                          |
|---------------|-------------------------------------------------|---------------------------------------------------------------------------------------------------------------|------|--------------------------|
| r197          | myxovirescin A<br>βEM, βEH                      | 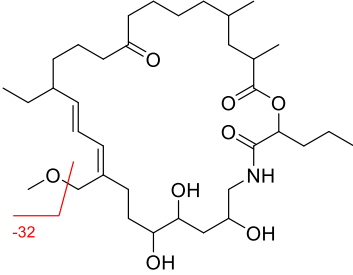 <p>myxovirescin A</p>       | +ESI | [51]<br>Fig4             |
| r198          | geldanamycin<br>βEE                             |  <p>geldanamycin</p>         | -ESI | [52]<br>FigS21           |
| r199-<br>r201 | chaxamycins A-C<br>βEH<br>αEH<br>Amide          |  <p>chaxamycin A</p>        | -ESI | [53]<br>Fig3             |
| r202          | chaxamycin D<br>βEO<br>Amide                    |  <p>chaxamycin D</p>       | -ESI | [53]<br>Fig3             |
| r203<br>r204  | strecacansamycin A<br>strecacansamycin B<br>βEE |  <p>strecacansamycin A</p> | +ESI | [54]<br>FigS12<br>FigS21 |
| r205          | strecacansamycin C<br>βEE, βEG                  |  <p>strecacansamycin C</p> | +ESI | [54]<br>FigS32           |

|                              |                                                                                                           |                                                                                                             |             |                           |
|------------------------------|-----------------------------------------------------------------------------------------------------------|-------------------------------------------------------------------------------------------------------------|-------------|---------------------------|
| <p><b>r206-<br/>r209</b></p> | <p>spiramycins I, II, III, IV</p> <p><math>\beta</math>EH, <math>\beta</math>EG, <math>\beta</math>EM</p> | 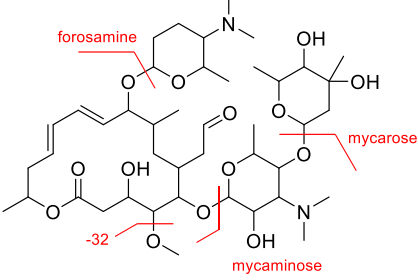 <p>spiramycin I</p>       | <p>+ESI</p> | <p>[55]<br/>Fig2</p>      |
| <p><b>r210</b></p>           | <p>neospiramycin I</p> <p><math>\beta</math>EH, <math>\beta</math>EG, <math>\beta</math>EM</p>            |  <p>neospiramycin I</p>    | <p>+ESI</p> | <p>[55]<br/>Fig10</p>     |
| <p><b>r211-<br/>r214</b></p> | <p>tylosins A, B, C, D</p> <p><math>\beta</math>EH, <math>\beta</math>EG</p>                              |  <p>tylosin A</p>         | <p>+ESI</p> | <p>[56]<br/>Fig3</p>      |
| <p><b>r215</b></p>           | <p>novonestmycin A</p> <p><math>\beta</math>EH, <math>\beta</math>EG</p>                                  |  <p>novonestmycin A</p> | <p>+ESI</p> | <p>[57]<br/>Fig5</p>      |
| <p><b>r216</b></p>           | <p>oleandomycin</p> <p><math>\beta</math>EG</p>                                                           |  <p>oleandomycin</p>     | <p>+ESI</p> | <p>[58]<br/>DatasetS4</p> |

|                                    |                                                                                                                                                   |                                                                                                         |                      |                                                         |
|------------------------------------|---------------------------------------------------------------------------------------------------------------------------------------------------|---------------------------------------------------------------------------------------------------------|----------------------|---------------------------------------------------------|
| <p><b>r217</b></p>                 | <p>megalomicin</p> <p><math>\beta</math>EG</p>                                                                                                    | 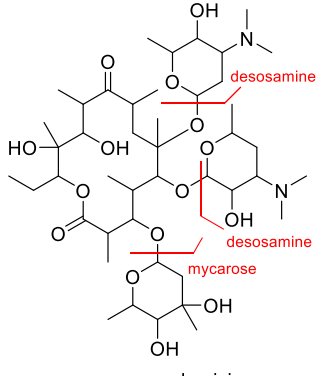 <p>megalomicin</p>    | <p>+ESI</p>          | <p>[58]<br/>DatasetS4</p>                               |
| <p><b>r218</b></p>                 | <p>lankamycin</p> <p><math>\beta</math>EG</p>                                                                                                     |  <p>lankamycin</p>     | <p>+ESI</p>          | <p>[58]<br/>DatasetS4</p>                               |
| <p><b>r219</b></p>                 | <p>chalconmycin</p> <p><math>\beta</math>EG</p>                                                                                                   |  <p>chalconmycin</p>  | <p>+ESI</p>          | <p>[58]<br/>DatasetS4</p>                               |
| <p><b>r220</b></p>                 | <p>kirromycin (mocimycin)</p> <p><math>\beta</math>EH, <math>\beta</math>EO, <math>\beta</math>EM</p> <p><math>\alpha</math>E-RA</p> <p>Amide</p> |  <p>kirromycin</p>  | <p>+ESI</p>          | <p>[59]<br/>Fig2<br/>Scheme1</p>                        |
| <p><b>r221</b><br/><b>r222</b></p> | <p>oligomycin A</p> <p>oligomycin C</p> <p><math>\beta</math>EH, <math>\beta</math>EE</p> <p><math>\alpha</math>E-RA</p>                          |  <p>oligomycin A</p> | <p>+ESI<br/>-ESI</p> | <p>[59]<br/>Table3<br/>Fig4<br/>Scheme2<br/>Scheme3</p> |

## Part 2. MS/MS data from polyketide standards

### Part 2-1. MS/MS data of erythromycin A (s1).

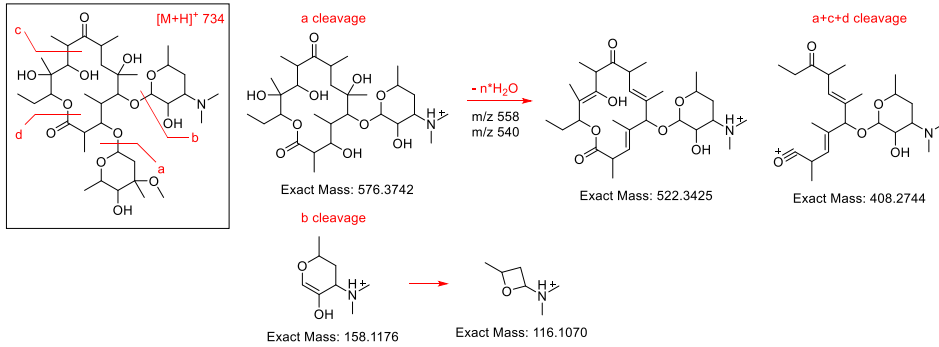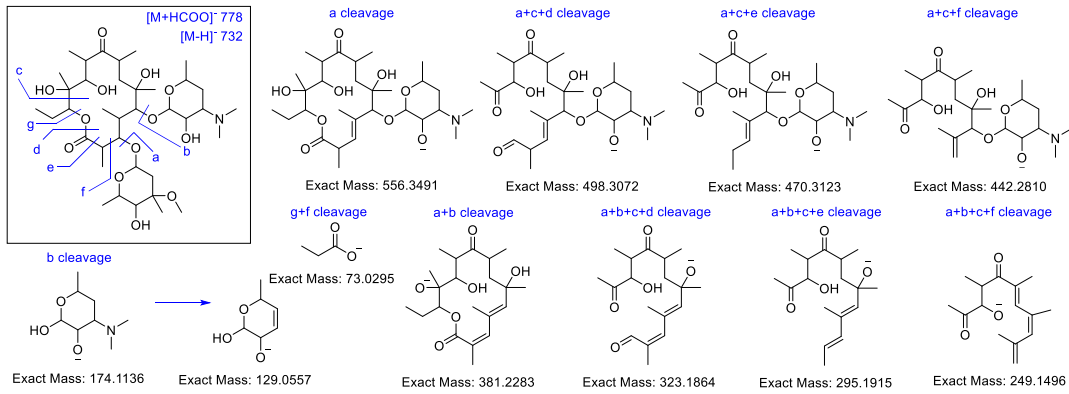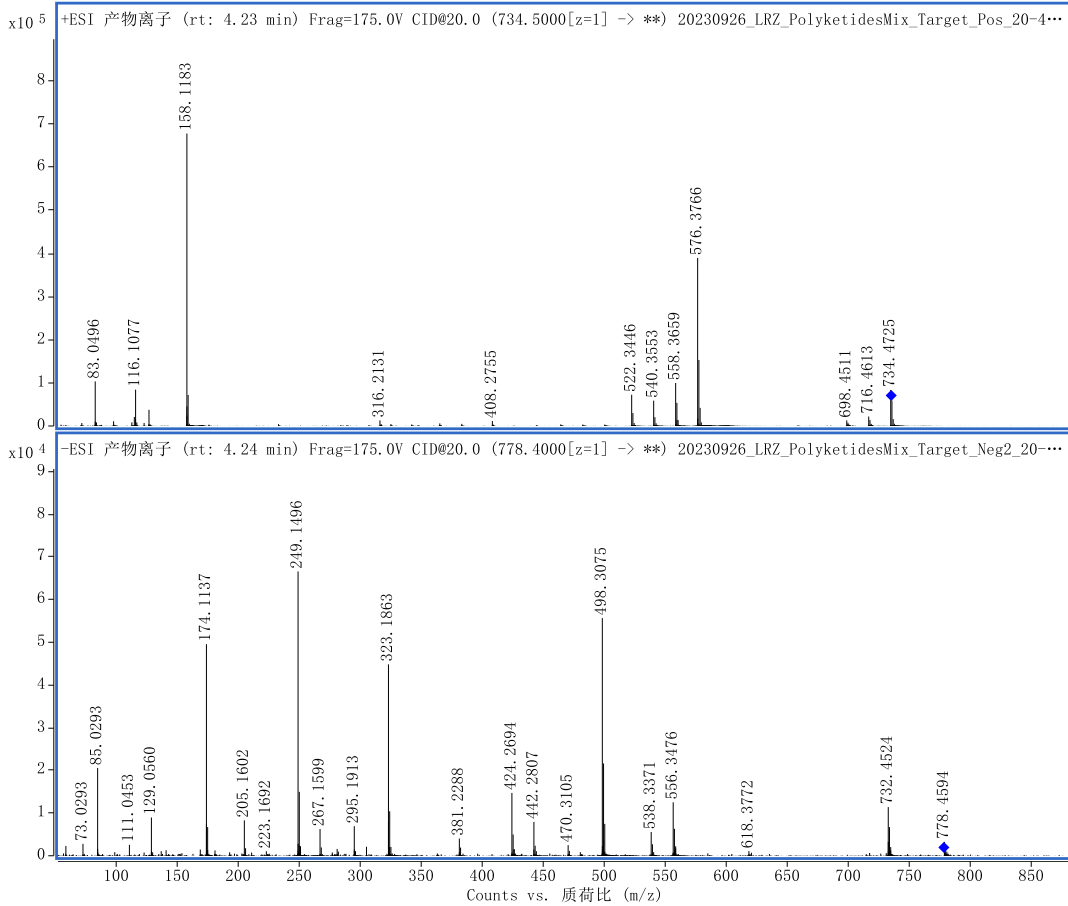



**Part 2-2. MS/MS data of clarithromycin (s2).**

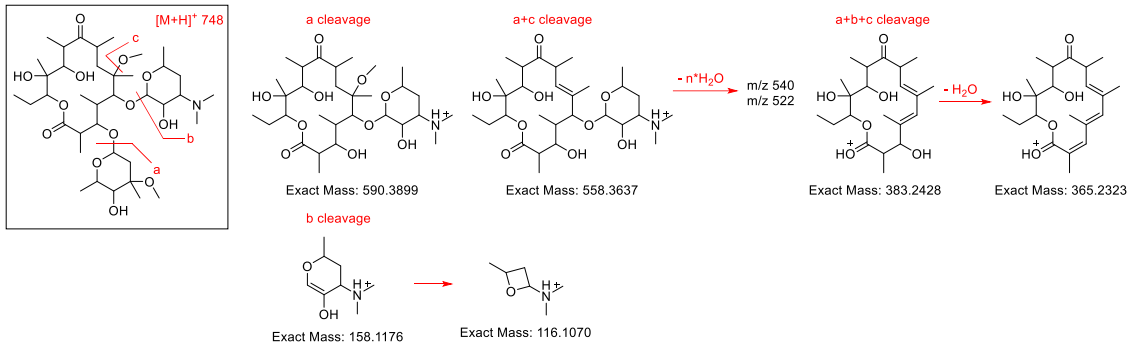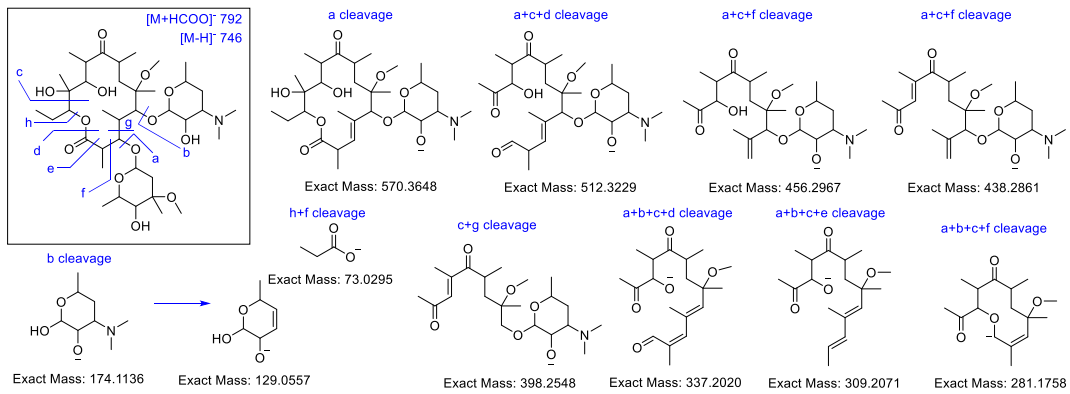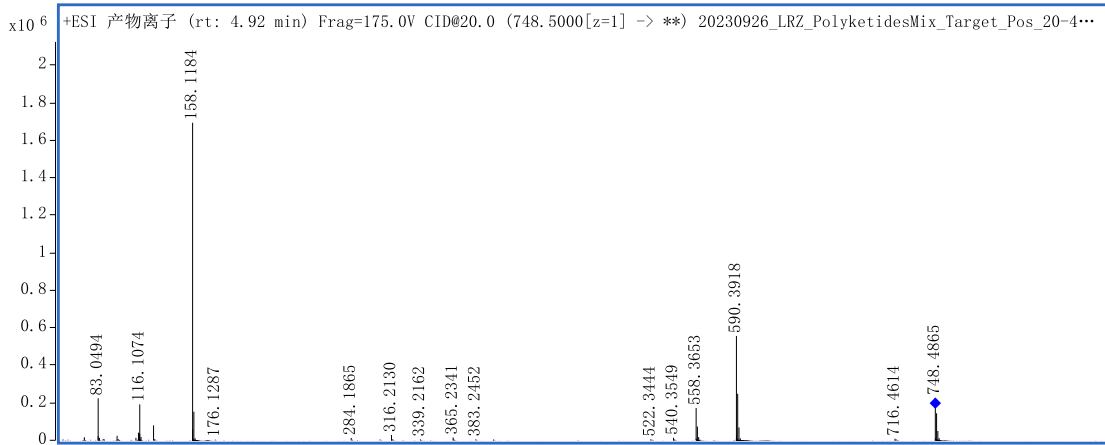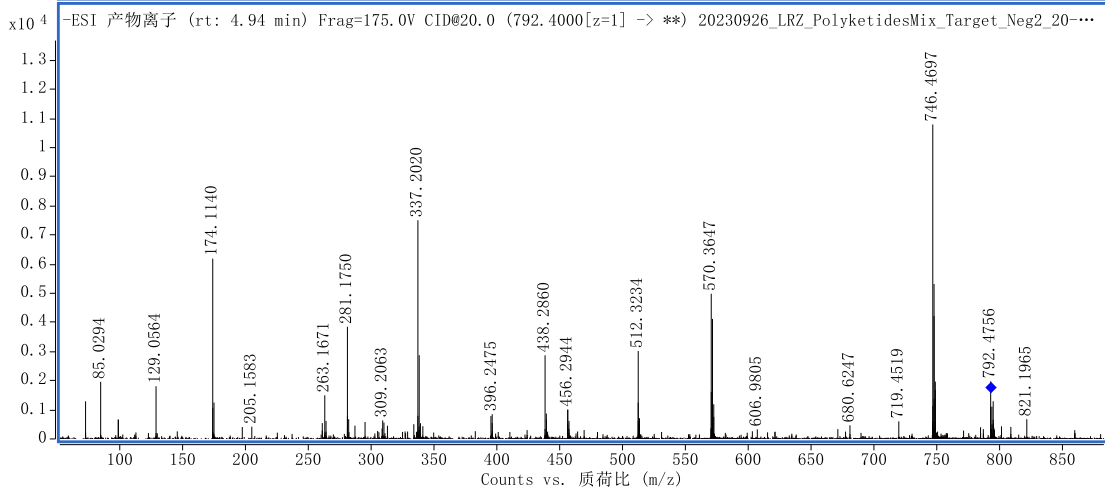

### Part 2-3. MS/MS data of midecamycin (s3).

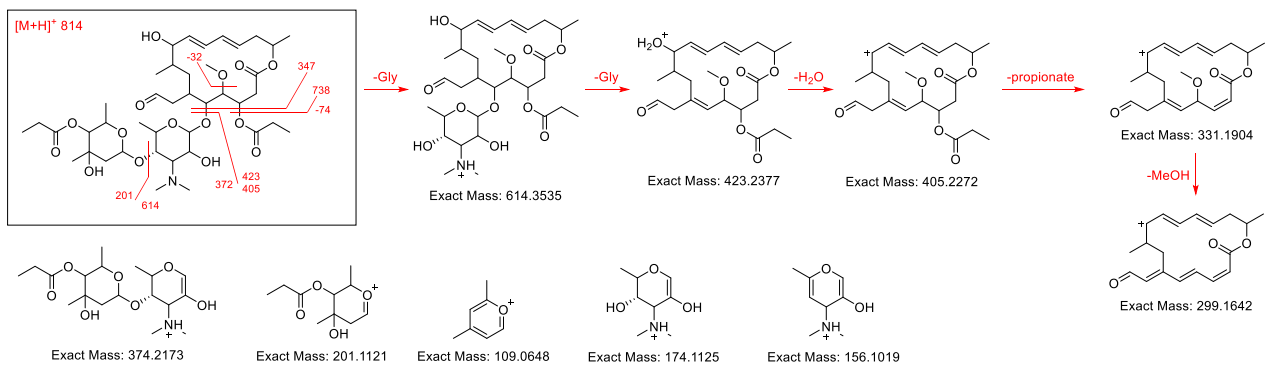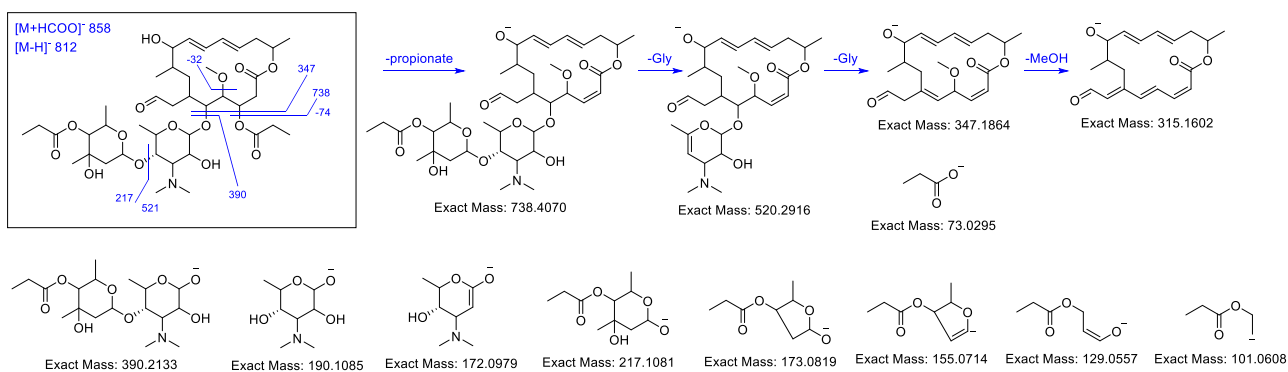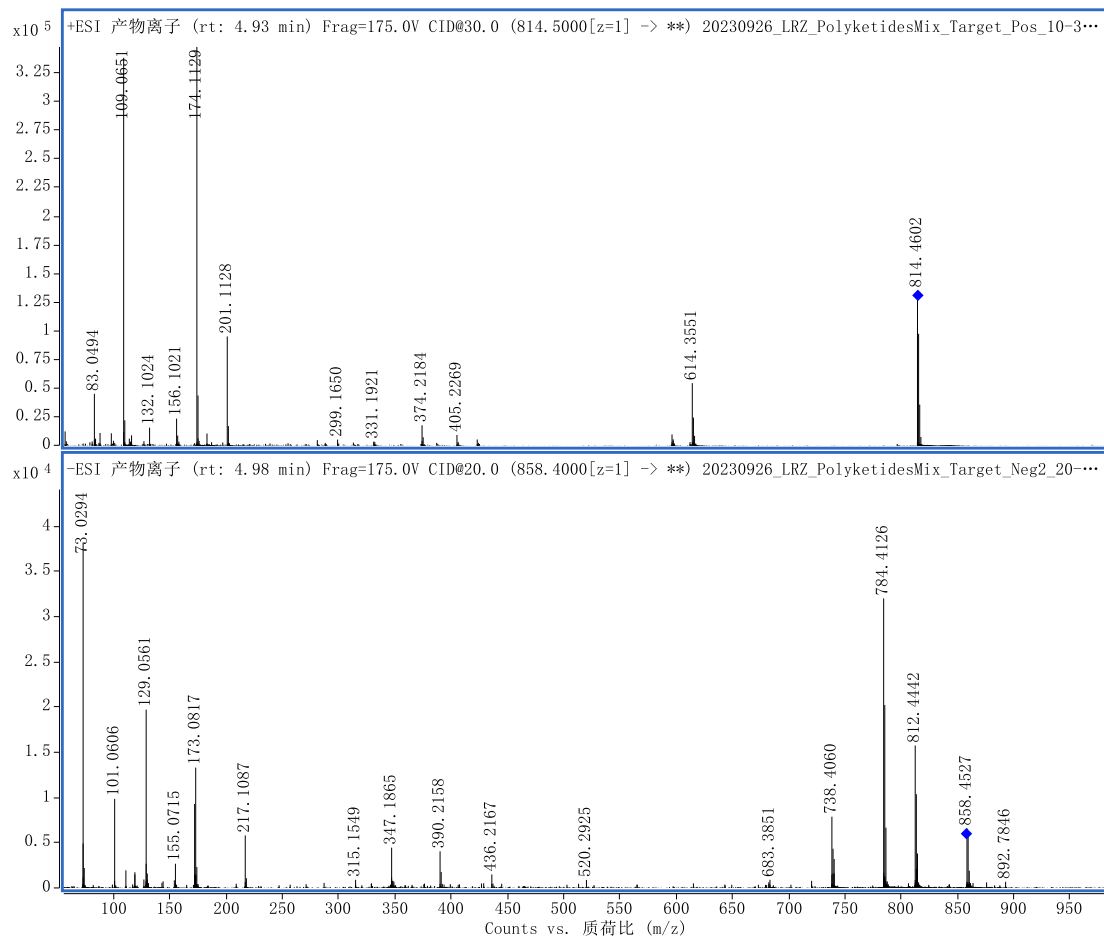

## Part 2-4. MS/MS data of rifamycin S (s4).

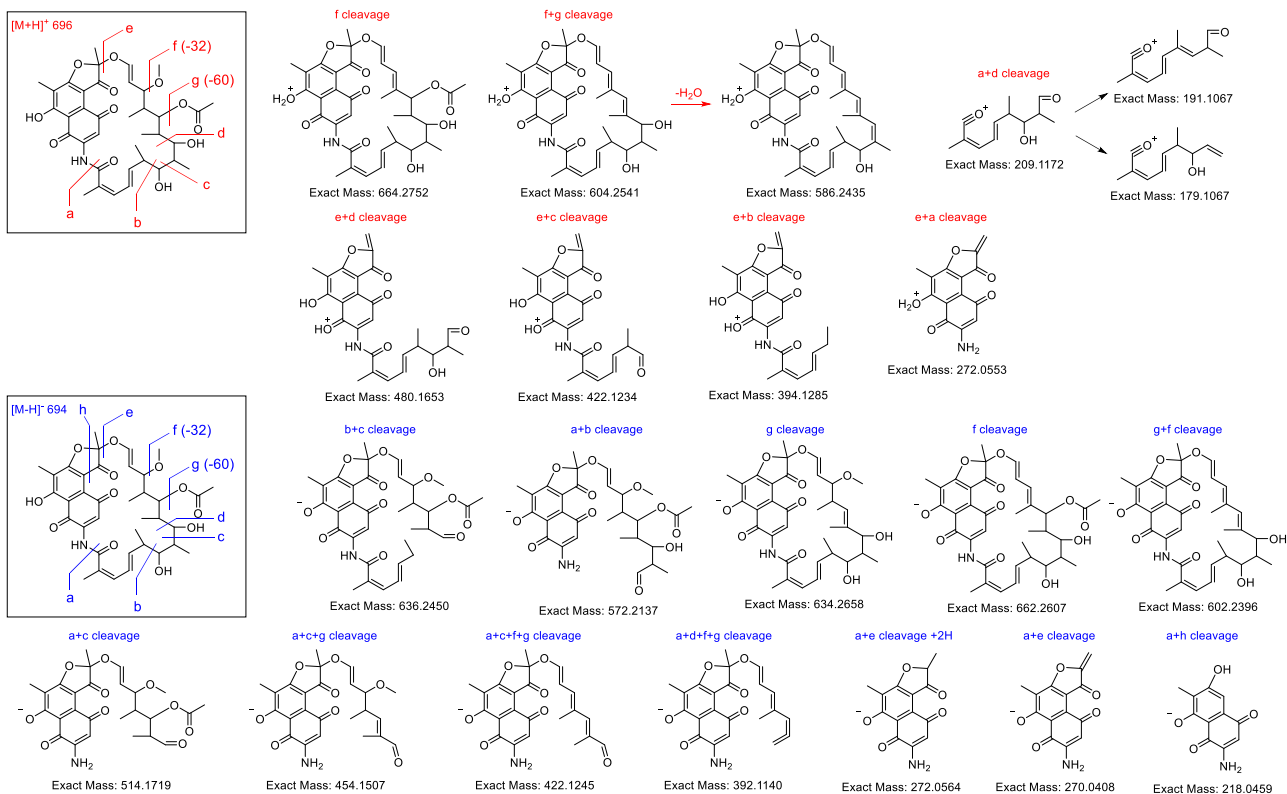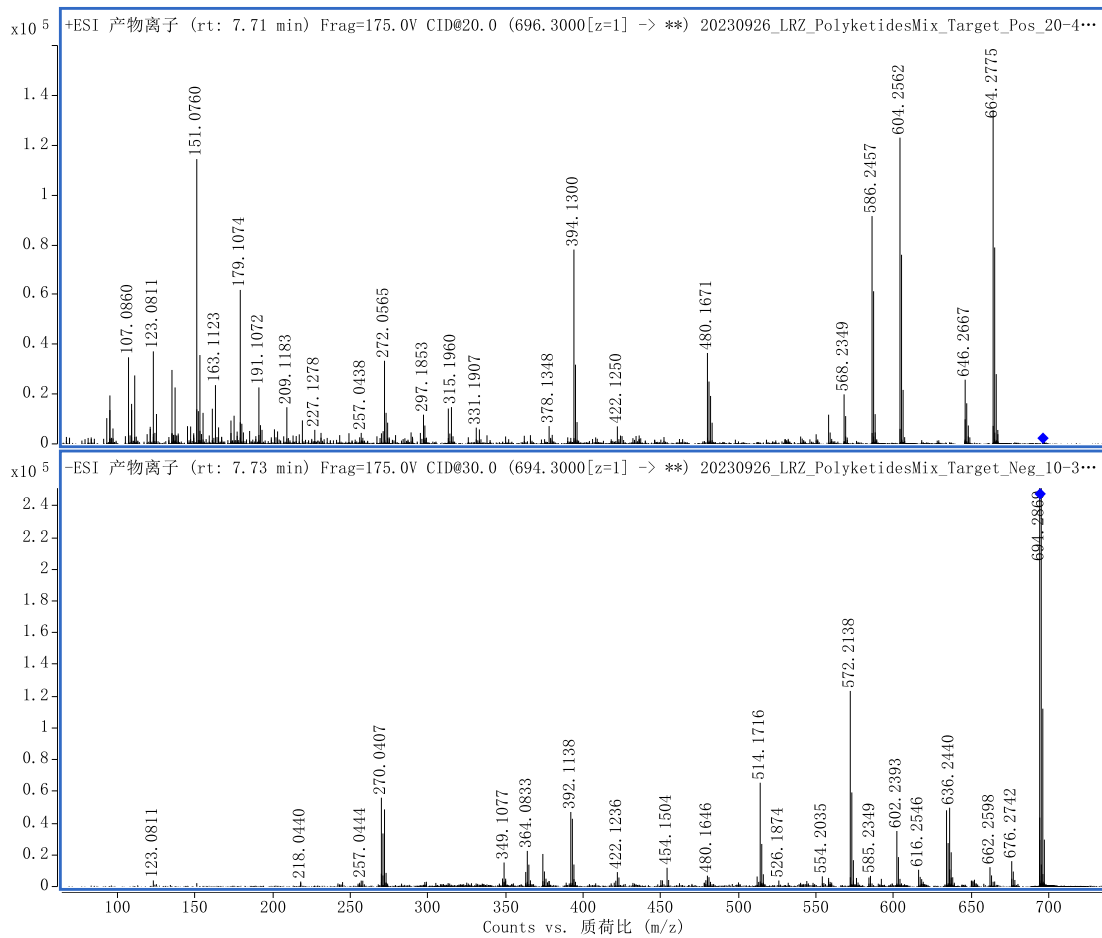

## Part 2-5. MS/MS data of rapamycin (s5).

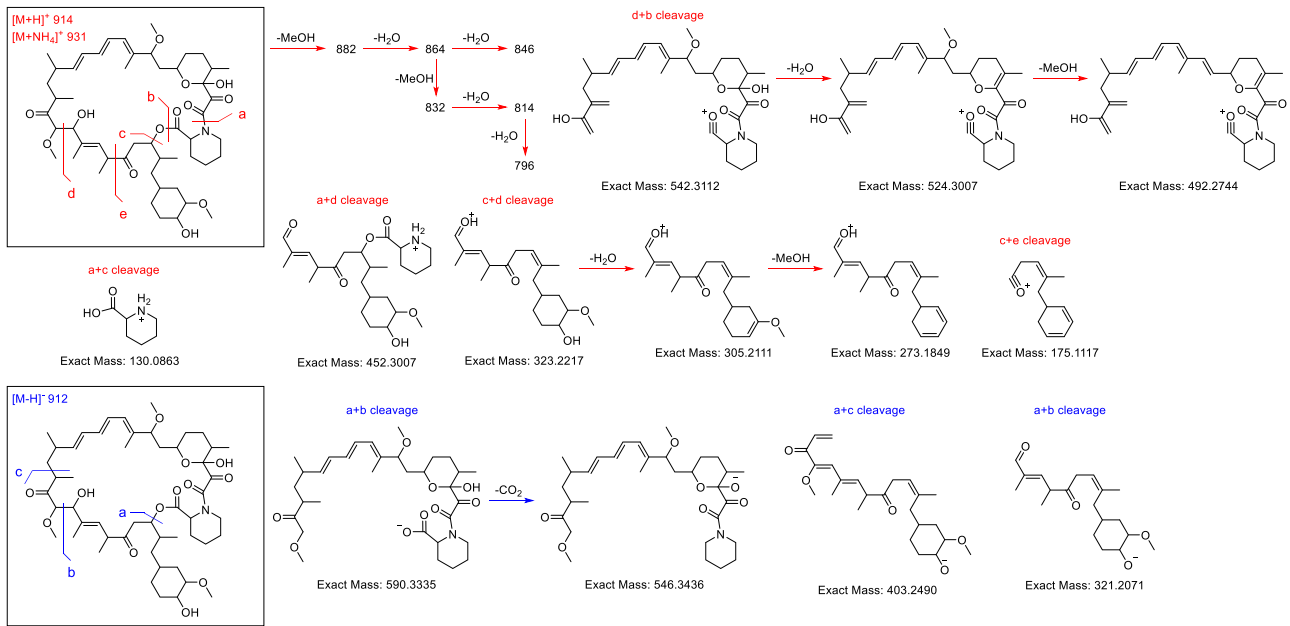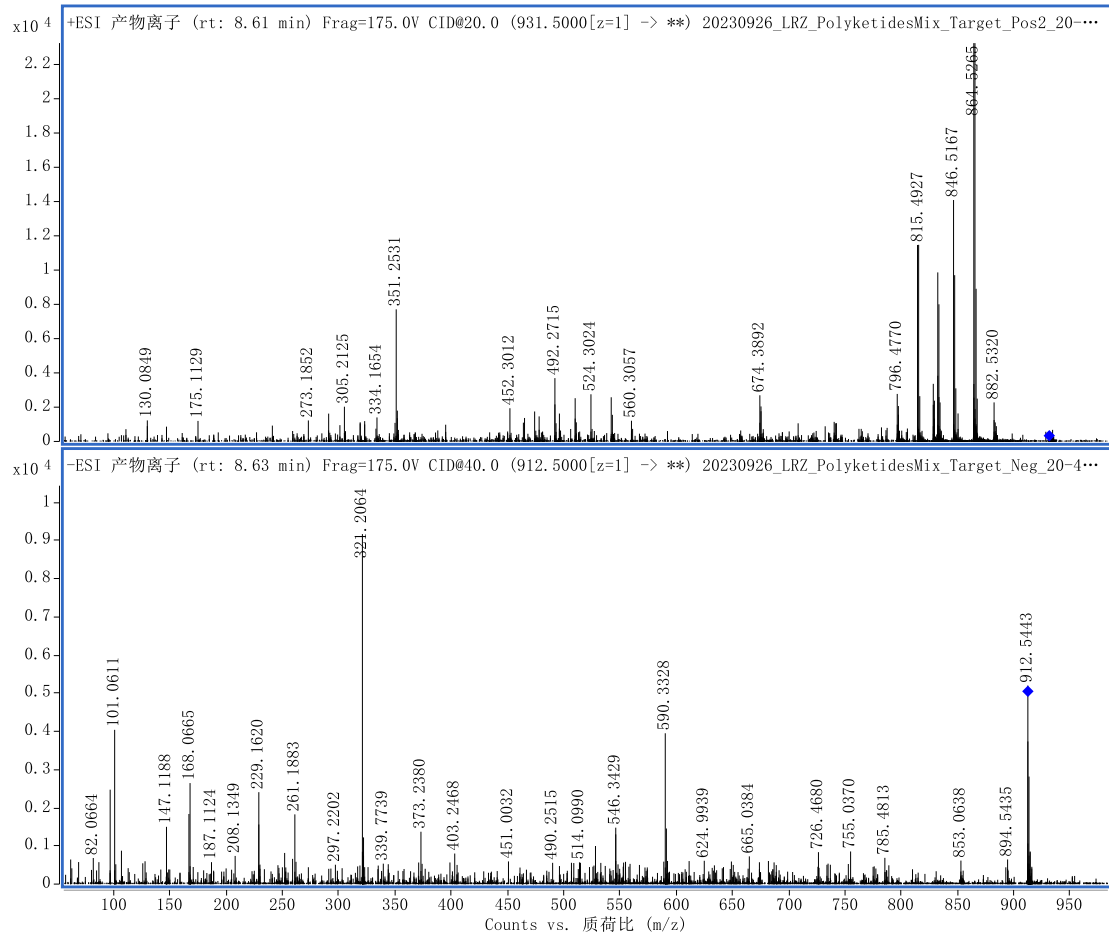

**Part 2-6. MS/MS data of natamycin (s6).**

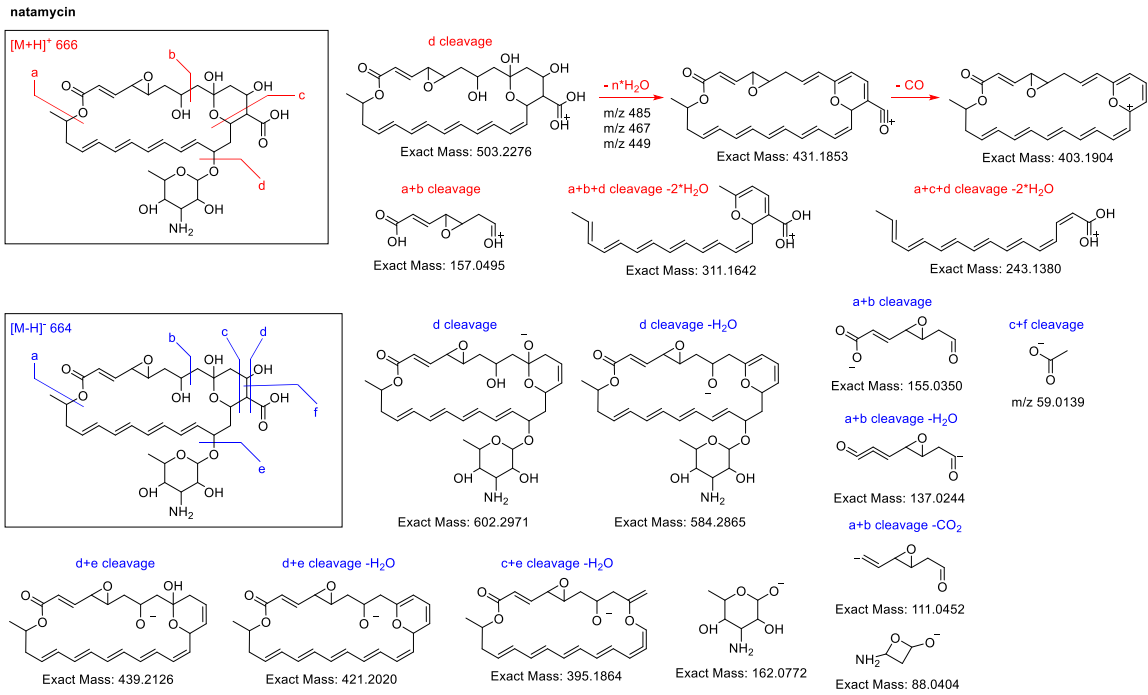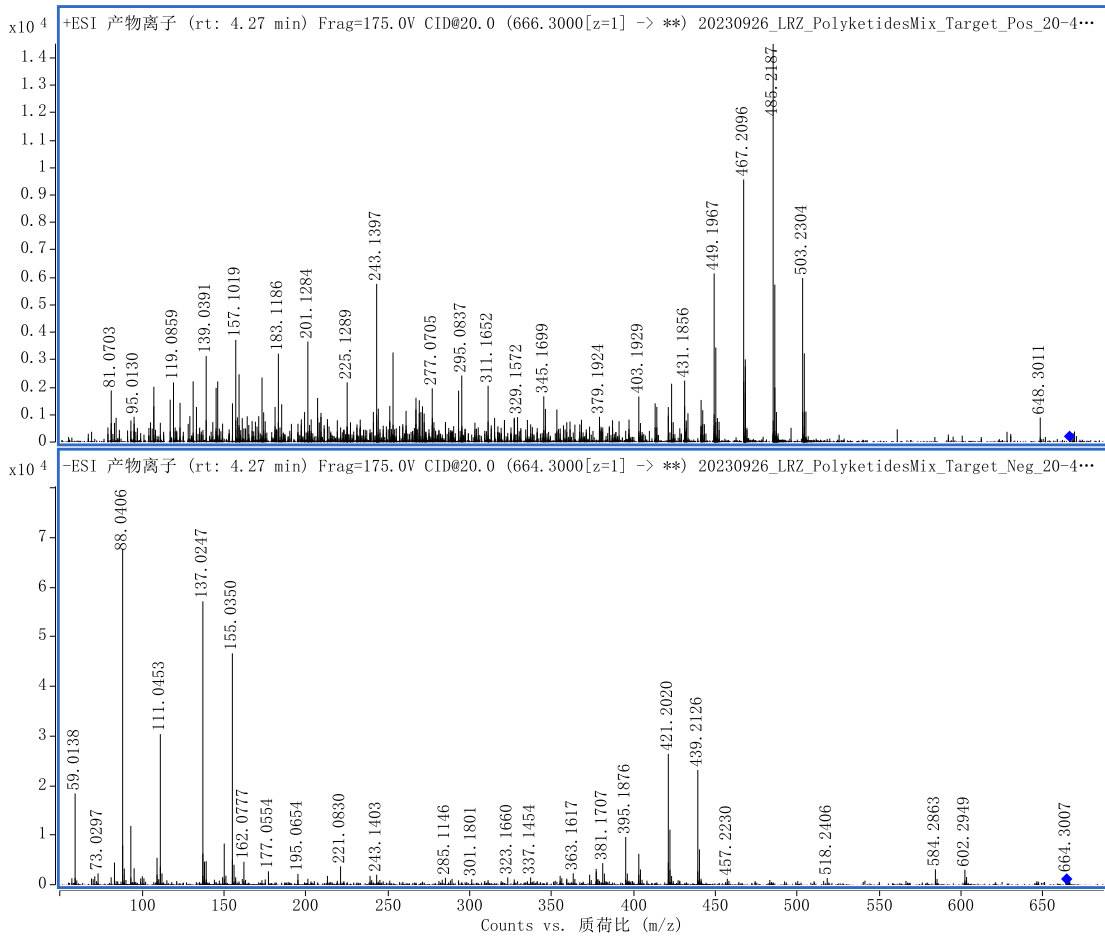

## Part 2-7. MS/MS data of amphotericin B (s7).

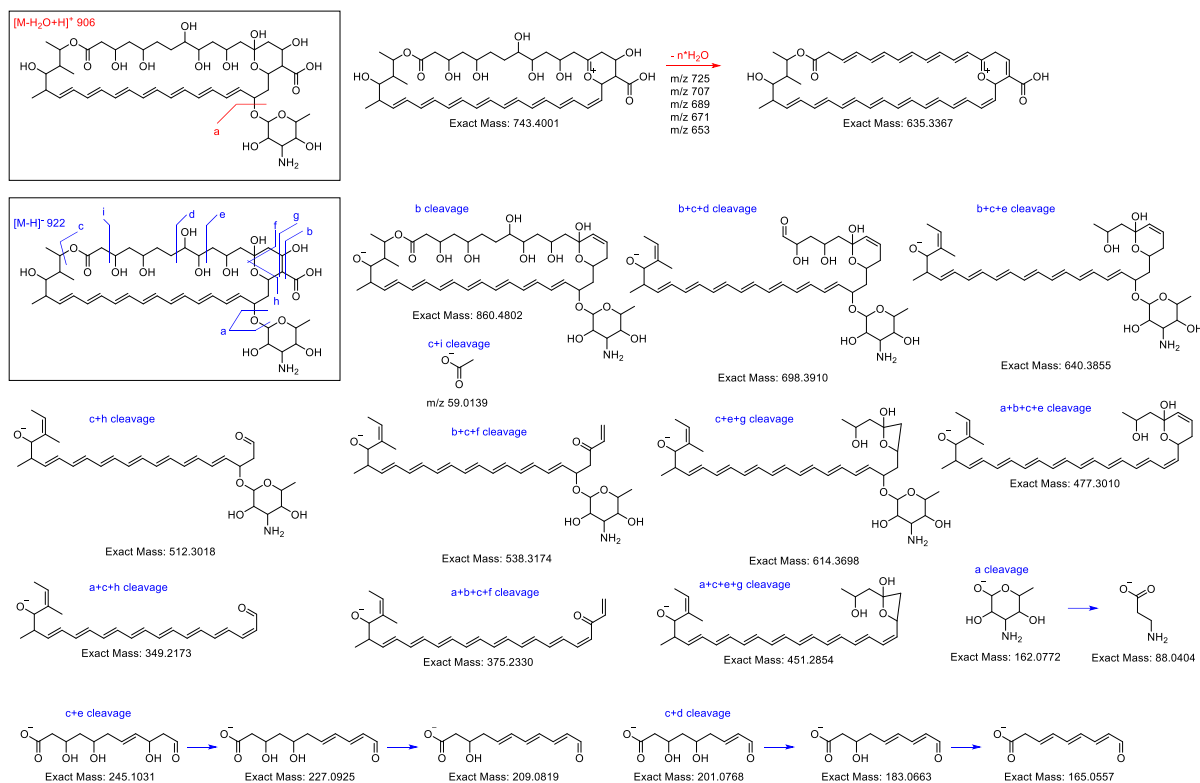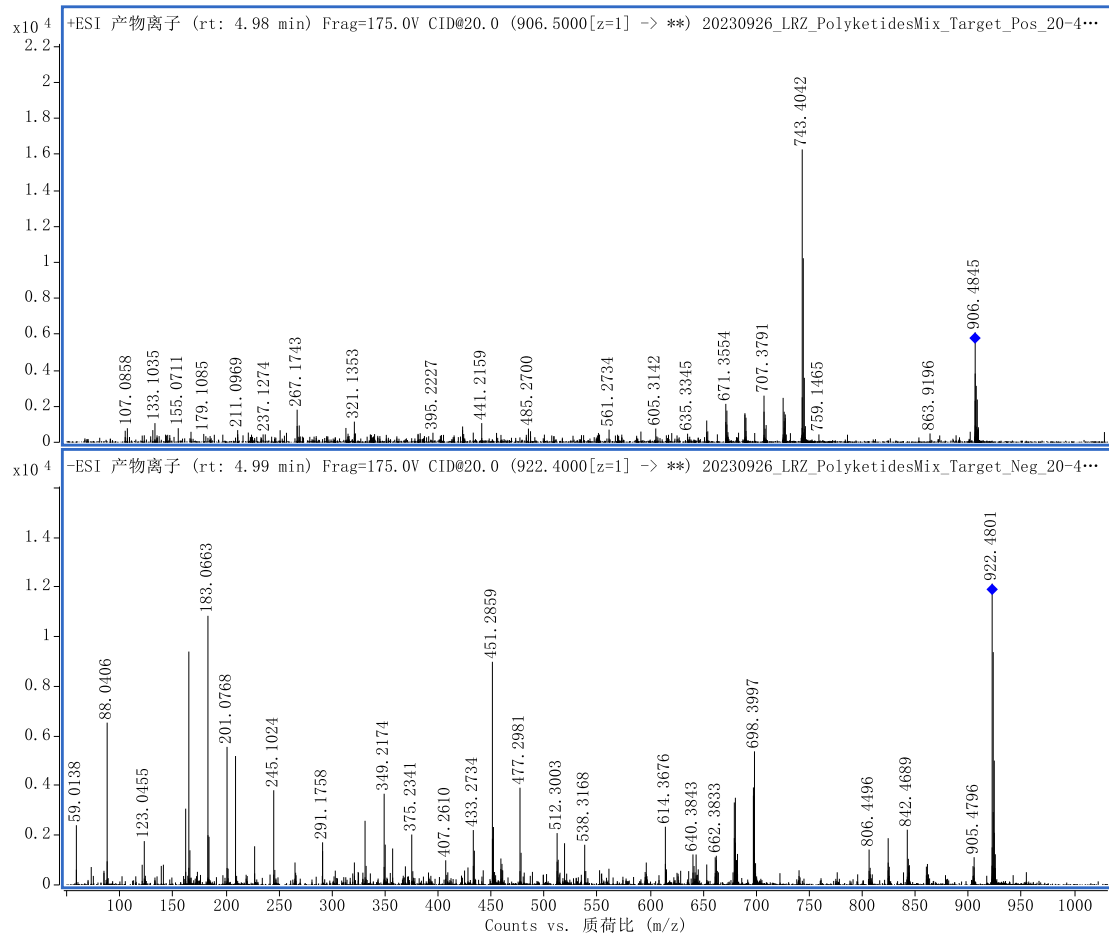

**Part 2-8. MS/MS data of nystatin (s8).**

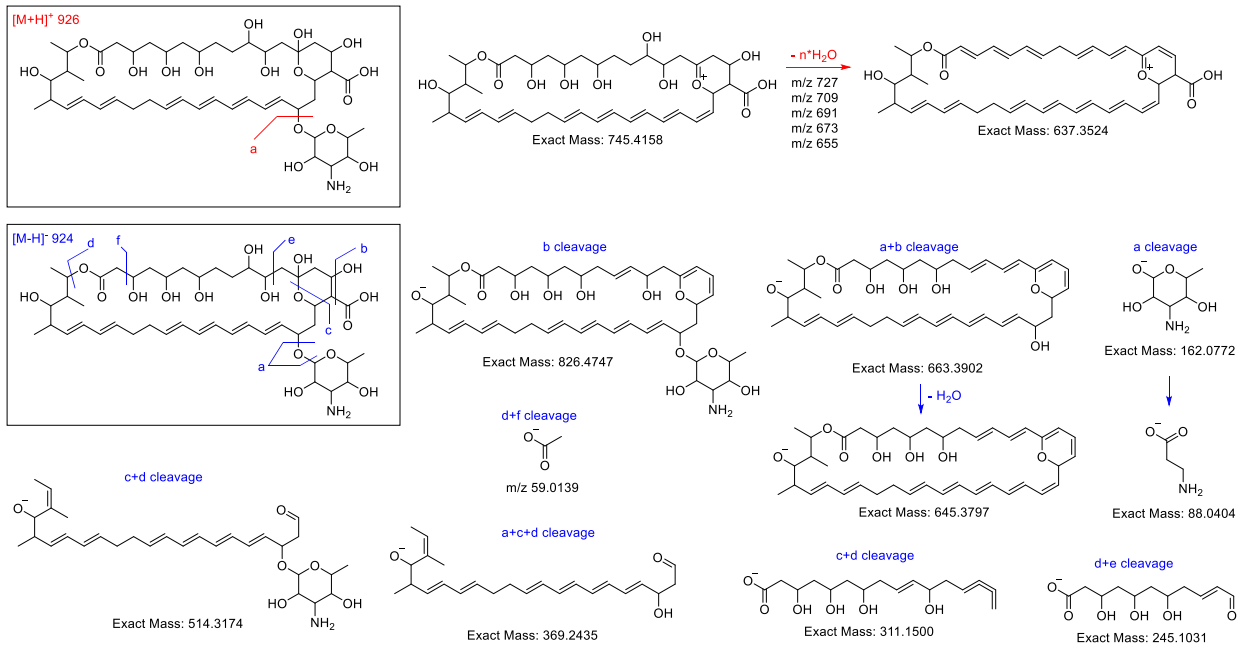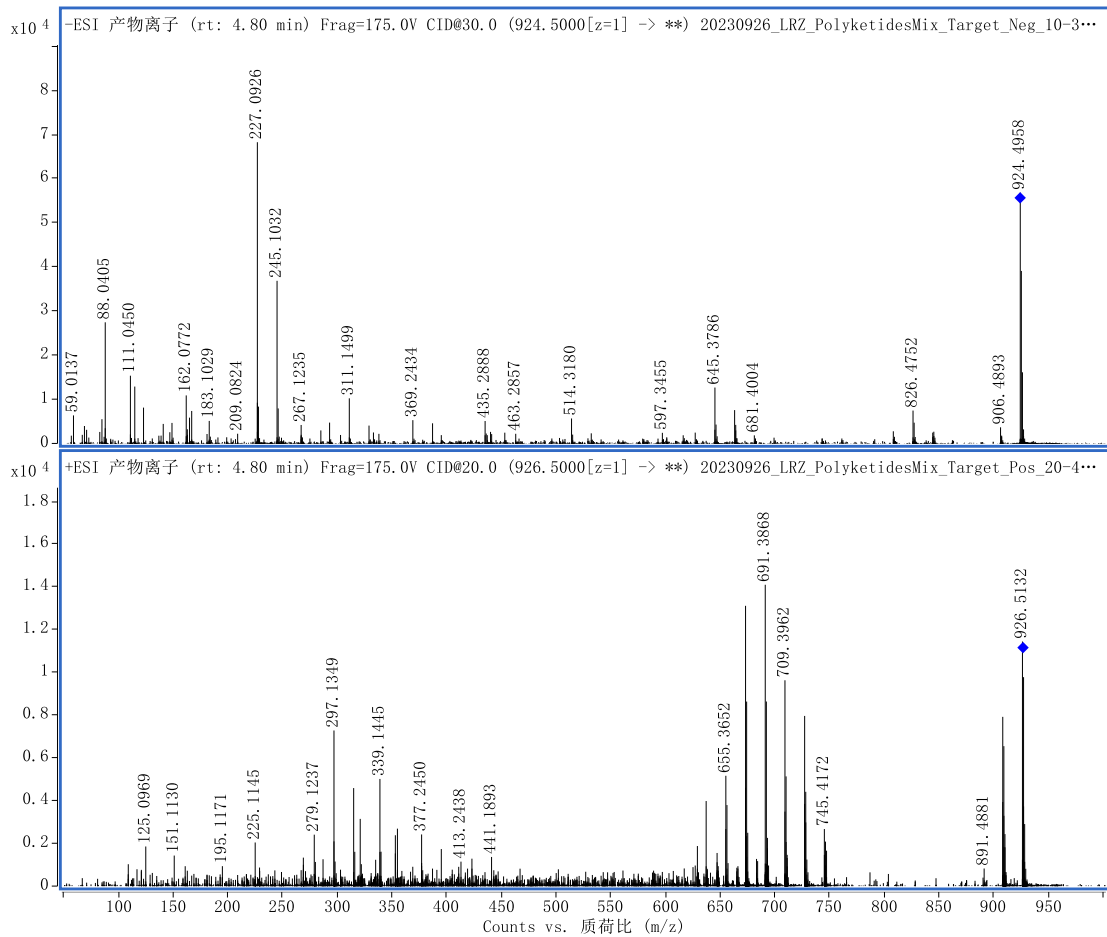

## Reference

1. Grote, M., et al., *Identification of crucial bottlenecks in engineered polyketide biosynthesis*. Organic & biomolecular chemistry, 2019. **17**(26): p. 6374-6385.
2. Engl, T., et al., *Evolutionary stability of antibiotic protection in a defensive symbiosis*. Proceedings of the National Academy of Sciences, 2018. **115**(9): p. E2020-E2029.
3. Moebius, N., et al., *Biosynthesis of the respiratory toxin bongkreikic acid in the pathogenic bacterium Burkholderia gladioli*. Chemistry & biology, 2012. **19**(9): p. 1164-1174.
4. Paulus, C., et al., *New natural products identified by combined genomics-metabolomics profiling of marine Streptomyces sp. MP131-18*. Scientific Reports, 2017. **7**(1): p. 42382.
5. Panter, F., D. Krug, and R. Müller, *Novel methoxymethacrylate natural products uncovered by statistics-based mining of the Myxococcus fulvus secondary metabolome*. ACS chemical biology, 2018. **14**(1): p. 88-98.
6. Moss, N.A., et al., *Ketoreductase domain dysfunction expands chemodiversity: malyngamide biosynthesis in the cyanobacterium Okeania hirsuta*. ACS chemical biology, 2018. **13**(12): p. 3385-3395.
7. Culp, E.J., et al., *ClpP inhibitors are produced by a widespread family of bacterial gene clusters*. Nature Microbiology, 2022. **7**(3): p. 451-462.
8. Jahns, C., et al., *Pellasoren: structure elucidation, biosynthesis, and total synthesis of a cytotoxic secondary metabolite from Sorangium cellulosum*. Angewandte Chemie International Edition, 2012. **21**(51): p. 5239-5243.
9. Yang, J., et al., *Genomics-inspired discovery of three antibacterial active metabolites, aurantinins B, C, and D from compost-associated Bacillus subtilis fmb60*. Journal of agricultural and food chemistry, 2016. **64**(46): p. 8811-8820.
10. Shao, Z., et al., *Refactoring the silent spectinabilin gene cluster using a plug-and-play scaffold*. ACS synthetic biology, 2013. **2**(11): p. 662-669.
11. He, H.-Y., et al., *Quartromicin biosynthesis: two alternative polyketide chains produced by one polyketide synthase assembly line*. Chemistry & Biology, 2012. **19**(10): p. 1313-1323.
12. Kanchanabanca, C., et al., *Unusual acetylation-elimination in the formation of tetronate antibiotics*. Angewandte Chemie, 2013. **125**(22): p. 5897-5900.
13. Fang, J., et al., *Cloning and characterization of the tetrocarcin A gene cluster from Micromonospora chalcea NRRL 11289 reveals a highly conserved strategy for tetronate biosynthesis in spirotetronate antibiotics*. Journal of bacteriology, 2008. **190**(17): p. 6014-6025.
14. Fonseca, T., et al., *Fragmentation studies on tetronasin by accurate-mass electrospray tandem mass spectrometry*. Journal of the American Society for Mass Spectrometry, 2004. **15**(3): p. 325-335.
15. Little, R., et al., *Unexpected enzyme-catalysed [4+ 2] cycloaddition and rearrangement in polyether antibiotic biosynthesis*. Nature Catalysis, 2019. **2**(11): p. 1045-1054.
16. Cogan, D.P., J. Ly, and S.K. Nair, *Structural basis for enzymatic off-loading of hybrid polyketides by dieckmann condensation*. ACS chemical biology, 2020. **15**(10): p. 2783-2791.
17. Hansen, K.A., et al., *Bacterial Associates of a Desert Specialist Fungus-Growing Ant Antagonize Competitors with a Nocamycin Analog*. ACS Chemical Biology, 2022. **17**(7): p. 1824-1830.
18. Sosio, M., et al., *Analysis of the pseudouridimycin biosynthetic pathway provides insights into the formation of C-nucleoside antibiotics*. Cell chemical biology, 2018. **25**(5): p. 540-549. e4.
19. Krespach, M.K., et al., *Streptomyces polyketides mediate bacteria-fungi interactions across soil*



- environments*. Nature Microbiology, 2023: p. 1-14.
20. Liu, R., et al., *Genomics-driven discovery of the biosynthetic gene cluster of maduramicin and its overproduction in Actinomadura sp. J1-007*. Journal of Industrial Microbiology and Biotechnology, 2020. **47**(2): p. 275-285.
  21. Iorio, M., et al., *Novel polyethers from screening Actinoallomurus spp.* Antibiotics, 2018. **7**(2): p. 47.
  22. Crevelin, E.J., et al., *Dereplication of Streptomyces sp. AMC 23 polyether ionophore antibiotics by accurate - mass electrospray tandem mass spectrometry*. Journal of Mass Spectrometry, 2014. **49**(11): p. 1117-1126.
  23. Wills, R.H., M. Tosin, and P.B. O'Connor, *Structural characterization of polyketides using high mass accuracy tandem mass spectrometry*. Analytical chemistry, 2012. **84**(20): p. 8863-8870.
  24. Lopes, N.P., et al., *Fragmentation studies on monensin A and B by accurate - mass electrospray tandem mass spectrometry*. Rapid Communications in Mass Spectrometry, 2002. **16**(5): p. 414-420.
  25. Wang, H., et al., *Genetic screening strategy for rapid access to polyether ionophore producers and products in actinomycetes*. Applied and environmental microbiology, 2011. **77**(10): p. 3433-3442.
  26. Harvey, B.M., et al., *Insights into polyether biosynthesis from analysis of the nigericin biosynthetic gene cluster in Streptomyces sp. DSM4137*. Chemistry & biology, 2007. **14**(6): p. 703-714.
  27. Lee, B., et al., *Isolation of new streptimidone derivatives, glutarimide antibiotics from Streptomyces sp. W3002 using LC-MS-guided screening*. The Journal of Antibiotics, 2020. **73**(3): p. 184-188.
  28. Niehs, S.P., et al., *Insect - associated bacteria assemble the antifungal butenolide gladiofungin by non - canonical polyketide chain termination*. Angewandte Chemie International Edition, 2020. **59**(51): p. 23122-23126.
  29. Ueoka, R., et al., *Genome - Based Identification of a Plant - Associated Marine Bacterium as a Rich Natural Product Source*. Angewandte Chemie, 2018. **130**(44): p. 14727-14731.
  30. Park, J.-S., et al., *Genome Analysis of Streptomycesnojiriensis JCM 3382 and Distribution of Gene Clusters for Three Antibiotics and an Azasugar across the Genus Streptomyces*. Microorganisms, 2021. **9**(9): p. 1802.
  31. Guerrero-Garzón, J.F., et al., *Streptomyces spp. from the marine sponge Antho dichotoma: analyses of secondary metabolite biosynthesis gene clusters and some of their products*. Frontiers in microbiology, 2020. **11**: p. 437.
  32. Zhang, L., et al., *Characterization of giant modular PKSs provides insight into genetic mechanism for structural diversification of aminopolyol polyketides*. Angewandte Chemie International Edition, 2017. **56**(7): p. 1740-1745.
  33. Hong, H., T. Fill, and P.F. Leadlay, *A common origin for guanidinobutanoate starter units in antifungal natural products*. Angewandte Chemie International Edition, 2013. **52**(49): p. 13096-13099.
  34. Covington, B.C., et al., *Response of secondary metabolism of hypogean actinobacterial genera to chemical and biological stimuli*. Applied and Environmental Microbiology, 2018. **84**(19): p. e01125-18.
  35. Park, H.-S., et al., *Screening and isolation of a novel polyene-producing Streptomyces strain inhibiting phytopathogenic fungi in the soil environment*. Frontiers in bioengineering and biotechnology, 2021. **9**: p. 692340.
  36. Hong, H., et al., *An amidinohydrolase provides the missing link in the biosynthesis of amino marginolactone antibiotics*. Angewandte Chemie International Edition, 2016. **55**(3): p. 1118-1123.
  37. Kim, H.-J., et al., *A single module type I polyketide synthase directs de novo macrolactone biogenesis during galbonolide biosynthesis in Streptomyces galbus*. Journal of Biological Chemistry, 2014. **289**(50): p. 34557-34568.

38. Song, L., et al., *Cytochrome P450-mediated hydroxylation is required for polyketide macrolactonization in stambomycin biosynthesis*. The Journal of Antibiotics, 2014. **67**(1): p. 71-76.
39. Matilla, M.A., et al., *Bacterial biosynthetic gene clusters encoding the anti-cancer haterumalide class of molecules: biogenesis of the broad spectrum antifungal and anti-oomycete compound, oocydin A*. Journal of Biological Chemistry, 2012. **287**(46): p. 39125-39138.
40. Buntin, K., et al., *Biosynthesis of thuggacins in myxobacteria: comparative cluster analysis reveals basis for natural product structural diversity*. Chemistry & biology, 2010. **17**(4): p. 342-356.
41. Molloy, E.M., et al., *Biological characterization of the hygrobafilomycin antibiotic JBIR-100 and bioinformatic insights into the hygrolide family of natural products*. Bioorganic & medicinal chemistry, 2016. **24**(24): p. 6276-6290.
42. Inahashi, Y., et al., *Identification and heterologous expression of the actinoallolide biosynthetic gene cluster*. The Journal of Antibiotics, 2018. **71**(8): p. 749-752.
43. Ueoka, R., et al., *Metabolic and evolutionary origin of actin-binding polyketides from diverse organisms*. Nature chemical biology, 2015. **11**(9): p. 705-712.
44. Humisto, A., et al., *The swinholide biosynthesis gene cluster from a terrestrial cyanobacterium, Nostoc sp. strain UHCC 0450*. Applied and Environmental Microbiology, 2018. **84**(3): p. e02321-17.
45. Niehs, S.P., et al., *Mining symbionts of a spider - transmitted fungus illuminates uncharted biosynthetic pathways to cytotoxic benzolactones*. Angewandte Chemie International Edition, 2020. **59**(20): p. 7766-7771.
46. Limbrick, E.M., et al., *Bifunctional nitron-conjugated secondary metabolite targeting the ribosome*. Journal of the American Chemical Society, 2020. **142**(43): p. 18369-18377.
47. Yushchuk, O., et al., *Eliciting the silent lucensomycin biosynthetic pathway in Streptomyces cyanogenus S136 via manipulation of the global regulatory gene adpA*. Scientific reports, 2021. **11**(1): p. 3507.
48. Kudo, K., et al., *In vitro Cas9-assisted editing of modular polyketide synthase genes to produce desired natural product derivatives*. Nature communications, 2020. **11**(1): p. 4022.
49. Elshahawi, S.I., et al., *Boronated tartrolon antibiotic produced by symbiotic cellulose-degrading bacteria in shipworm gills*. Proceedings of the National Academy of Sciences, 2013. **110**(4): p. E295-E304.
50. Hwang, S., et al., *Structure revision and the biosynthetic pathway of tripartilactam*. Journal of natural products, 2020. **83**(3): p. 578-583.
51. Simunovic, V., et al., *Myxovirescin A Biosynthesis is Directed by Hybrid Polyketide Synthases/Nonribosomal Peptide Synthetase, 3 - Hydroxy - 3 - Methylglutaryl - CoA Synthases, and trans - Acting Acyltransferases*. ChemBioChem, 2006. **7**(8): p. 1206-1220.
52. Thaker, M.N., et al., *Identifying producers of antibacterial compounds by screening for antibiotic resistance*. Nature biotechnology, 2013. **31**(10): p. 922-927.
53. Castro, J.F., et al., *Identification and heterologous expression of the chaxamycin biosynthesis gene cluster from Streptomyces leeuwenhoekii*. Applied and Environmental Microbiology, 2015. **81**(17): p. 5820-5831.
54. Liu, L.-L., et al., *Molecular networking-based for the target discovery of potent antiproliferative polycyclic macrolactam ansamycins from Streptomyces cacaoi subsp. asoensis*. Organic Chemistry Frontiers, 2020. **7**(24): p. 4008-4018.
55. Pendela, M., et al., *Characterization of impurities in spiramycin by liquid chromatography/ion trap mass spectrometry*. Rapid Communications in Mass Spectrometry: An International Journal Devoted to the

Rapid Dissemination of Up - to - the - Minute Research in Mass Spectrometry, 2007. **21**(4): p. 599-613.

56. Chopra, S., et al., *Characterization of impurities in tylosin using dual liquid chromatography combined with ion trap mass spectrometry*. *Talanta*, 2013. **106**: p. 29-38.
57. Velasco-Alzate, K.Y., et al., *Marine bacteria from Rocas Atoll as a rich source of pharmacologically active compounds*. *Marine Drugs*, 2019. **17**(12): p. 671.
58. Kersten, R.D., et al., *Glycogenomics as a mass spectrometry-guided genome-mining method for microbial glycosylated molecules*. *Proceedings of the National Academy of Sciences*, 2013. **110**(47): p. E4407-E4416.
59. Fredenhagen, A., C. Derrien, and E. Gassmann, *An MS/MS library on an ion-trap instrument for efficient dereplication of natural products. Different fragmentation patterns for [M+ H]<sup>+</sup> and [M+ Na]<sup>+</sup> ions*. *Journal of natural products*, 2005. **68**(3): p. 385-391.

| Compounds                                                          | +ESI spectra                                                                        | +ESI in-source fragmentation degree | -ESI spectra                                                                         | -ESI in-source fragmentation degree | References (DOI)              | Data Source          |
|--------------------------------------------------------------------|-------------------------------------------------------------------------------------|-------------------------------------|--------------------------------------------------------------------------------------|-------------------------------------|-------------------------------|----------------------|
| *For high resolution figures, please check the original references |                                                                                     |                                     |                                                                                      |                                     |                               |                      |
| ajudazol A                                                         | 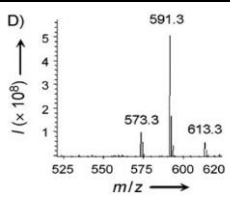   | moderate                            |                                                                                      |                                     | 10.1002/cbic.200900712        | Figure 4             |
| kirromycin                                                         |                                                                                     |                                     |    | weak                                | 10.1002/cbic.201300211        | Figure 1             |
| bacillaene B                                                       |    | strong                              |                                                                                      |                                     | 10.1002/anie.200905468        | Figure S24           |
| kalimantacin A                                                     |   | strong                              |                                                                                      |                                     | 10.1016/j.chembio.2010.01.014 | Figure S1            |
| kalimantacin analogue 7                                            |  | moderate                            |                                                                                      |                                     | 10.1016/j.chembio.2010.01.014 | Figure S2            |
| kalimantacin analogue 6                                            |  | weak                                |                                                                                      |                                     | 10.1016/j.chembio.2010.01.014 | Figure S4            |
| thailanstatins A                                                   |  | weak                                |                                                                                      |                                     | 10.1021/np300913h             | Figure S3            |
| thailanstatins B                                                   |  | weak                                |                                                                                      |                                     | 10.1021/np300913h             | Figure S15           |
| thailanstatins C                                                   |  | weak                                |                                                                                      |                                     | 10.1021/np300913h             | Figure S27           |
| 4-Z-Annimycin                                                      |                                                                                     |                                     |  | weak                                | 10.1016/j.chembio.2013.09.006 | Figure S1            |
| butyrolactol A                                                     |  | weak                                |                                                                                      |                                     | 10.1038/s41589-018-0187-0     | Supplementary Note 1 |

|                                |                                                                                     |          |                             |                      |
|--------------------------------|-------------------------------------------------------------------------------------|----------|-----------------------------|----------------------|
| oxazoltetraene acid            | 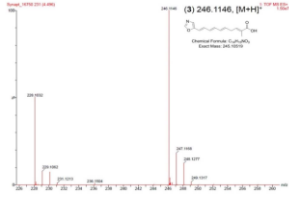   | strong   | 10.1038/s41589-018-0187-0   | Supplementary Note 2 |
| oxazoltriene acid              |    | moderate | 10.1038/s41589-018-0187-0   | Supplementary Note 2 |
| lagunapyrone A                 |    | strong   | 10.1038/srep42382           | Figure S6            |
| lagunapyrone B                 |    | strong   | 10.1038/srep42382           | Figure S6            |
| lagunapyrone C                 |    | strong   | 10.1038/srep42382           | Figure S6            |
| lagunapyrone D                 |    | strong   | 10.1038/srep42382           | Figure S6            |
| lagunapyrone E                 |   | strong   | 10.1038/srep42382           | Figure S6            |
| fulvuthiacene A                |  | strong   | 10.1021/acscchembio.8b00948 | Figure S22           |
| fulvuthiacene B                |  | strong   | 10.1021/acscchembio.8b00948 | Figure S23           |
| $\alpha$ -lipomycin            |  | strong   | 10.1038/ja.2013.110         | Figure S1            |
| 21-methyl- $\alpha$ -lipomycin |  | strong   | 10.1038/ja.2013.110         | Figure S1            |
| TM-123                         |  | strong   | 10.1021/acscchembio.0c00775 | Figure S5            |
| TM-124                         |  | moderate | 10.1021/acscchembio.0c00775 | Figure S15           |
| TM-125                         |  | moderate | 10.1021/acscchembio.0c00775 | Figure S23           |
| TM-126                         |  | weak     | 10.1021/acscchembio.0c00775 | Figure S30           |
| clipibicyclene                 |  | moderate | 10.1038/s41564-022-01073-4  | Figure 3             |

|                      |                                                                                     |          |                                                                                      |                                 |                              |            |
|----------------------|-------------------------------------------------------------------------------------|----------|--------------------------------------------------------------------------------------|---------------------------------|------------------------------|------------|
| janustatins A        | 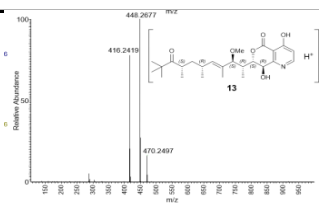   | strong   |                                                                                      | 10.1038/s41557-022-01020-0      | Figure S38                   |            |
| ent-janustatin A     |    | strong   |                                                                                      | 10.1038/s41557-022-01020-0      | Figure S38                   |            |
| janustatins B        |    | weak     |                                                                                      | 10.1038/s41557-022-01020-0      | Figure S24                   |            |
| janustatins C        |    | weak     |                                                                                      | 10.1038/s41557-022-01020-0      | Figure S31                   |            |
| pericidin A1         |   | strong   |   | weak                            | 10.1021/ol4034176            | Figure S1  |
| pericidin E1         |  | weak     |                                                                                      | 10.1021/ol4034176               | Figure S6                    |            |
| pericidin analogue 4 |  | moderate |  | weak                            | 10.1021/ol4034176            | Figure S13 |
| mer-A2026B           |  | strong   |                                                                                      | 10.1021/ol4034176               | Figure S5                    |            |
| microbimicin         |  | weak     |                                                                                      | 10.1016/j.phytochem.2021.112700 | Figure S13                   |            |
| abyssomicin Z1       |  | weak     |                                                                                      | 10.1016/j.phytochem.2021.112700 | Figure S24                   |            |
| abyssomicin M        |  | weak     |  | weak                            | 10.1021/acs.jnatprod.7b00108 | Figure S15 |
| abyssomicin N        |  | weak     |  | weak                            | 10.1021/acs.jnatprod.7b00108 | Figure S23 |
| abyssomicin O        |  | weak     |  | weak                            | 10.1021/acs.jnatprod.7b00108 | Figure S31 |

|                    |                                                                                     |          |                                                                                      |          |                               |                          |
|--------------------|-------------------------------------------------------------------------------------|----------|--------------------------------------------------------------------------------------|----------|-------------------------------|--------------------------|
| abyssomicin P      | 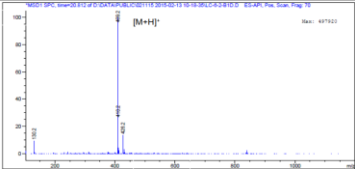   | weak     |    | weak     | 10.1021/acs.jnatpr od.7b00108 | Figure S39               |
| abyssomicin Q      |    | weak     |    | moderate | 10.1021/acs.jnatpr od.7b00108 | Figure S47               |
| abyssomicin S      |    | strong   |    | strong   | 10.1021/acs.jnatpr od.7b00108 | Figure S75<br>Figure S76 |
| abyssomicin T      |    | moderate |    | moderate | 10.1021/acs.jnatpr od.7b00108 | Figure S89               |
| abyssomicin U      |   | moderate |   | weak     | 10.1021/acs.jnatpr od.7b00108 | Figure S97               |
| abyssomicin V      |  | weak     |  | weak     | 10.1021/acs.jnatpr od.7b00108 | Figure S105              |
| abyssomicin W      |  | strong   |  | moderate | 10.1021/acs.jnatpr od.7b00108 | Figure S113              |
| abyssomicin X      |  | moderate |  | weak     | 10.1021/acs.jnatpr od.7b00108 | Figure S125              |
| streptaspironate A |  | moderate |                                                                                      |          | 10.1021/acs.joc.0 c01210      | Figure S8                |
| streptaspironate B |  | weak     |                                                                                      |          | 10.1021/acs.joc.0 c01210      | Figure S18               |
| streptaspironate C |  | strong   |                                                                                      |          | 10.1021/acs.joc.0 c01210      | Figure S28               |
| tetromadurin       |  | weak     |                                                                                      |          | 10.3390/molecules28114276     | Figure 9                 |
| tetronasin         |  | moderate |                                                                                      |          | 10.1038/s41929-019-0351-2     | Figure S8                |

|                             |                                                                                     |          |                                                                                    |                              |                             |            |
|-----------------------------|-------------------------------------------------------------------------------------|----------|------------------------------------------------------------------------------------|------------------------------|-----------------------------|------------|
| tetronasin intermediate 3   | 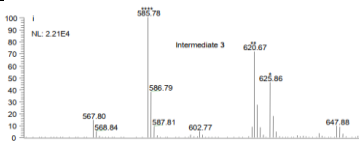   | strong   |                                                                                    | 10.1038/s41929-019-0351-2    | Figure S8                   |            |
| tetronasin intermediate 4   |    | moderate |                                                                                    | 10.1038/s41929-019-0351-2    | Figure S12                  |            |
| nostovalerolactone          |    | strong   |  | 10.1002/anie.2022-04545      | Figure S25-S26              |            |
| 9-dehydronostovalerolactone |    | strong   |  | 10.1002/anie.2022-04545      | Figure S31-S32              |            |
| nocamycin V                 |   | moderate |                                                                                    |                              | 10.1021/acschem-bio.2c00187 | Figure S1  |
| T-17                        |  | strong   |                                                                                    | 10.1371/journal.pone.0239054 | Figure 8                    |            |
| J1-001-2                    |  | weak     |                                                                                    |                              | 10.1021/acsptsci.8b00007    | Figure S13 |
| J1-001-3                    |                                                                                     |          |                                                                                    |                              |                             |            |



|                        |  |          |                              |            |
|------------------------|--|----------|------------------------------|------------|
| desertomycin A         |  | weak     | 10.1002/ange.201509300       | Figure S4  |
| azalomycin F4a         |  | weak     | 10.1002/ange.201509300       | Figure S4  |
| mediomycin A           |  | weak     | 10.1007/s00253-017-8729-z    | Figure S2  |
| mediomycin B           |  | weak     | 10.1007/s00253-017-8729-z    | Figure S5  |
| neomediomycin B        |  | weak     | 10.1002/ange.201611371       | Figure S2  |
| funisamine             |  | weak     | 10.1128/AEM.01125-18.        | Figure S42 |
| turonicin A            |  | weak     | 10.1021/acs.jnatprod.3c00144 | Figure S9  |
| inha-neotetrafrabricin |  | weak     | 10.3389/fbioe.2021.692340    | Figure S4  |
| galbonolide A          |  | moderate | 10.1074/jbc.M114.602334      | Figure 4   |
| galbonolide B          |  | moderate | 10.1074/jbc.M114.602334      | Figure 4   |
| galbonolide C          |  | weak     | 10.1074/jbc.M114.602334      | Figure 4   |
| gulmirecin A           |  | weak     | 10.1002/chem.201404291       | Figure S5  |
| macrolactin 1c         |  | moderate | 10.1111/1462-2920.13367      | Figure S5  |
| macrolactin 1d         |  | moderate | 10.1111/1462-2920.13367      | Figure S6  |

|                |                                                                                     |          |                                 |            |
|----------------|-------------------------------------------------------------------------------------|----------|---------------------------------|------------|
| macrolactin 1e | 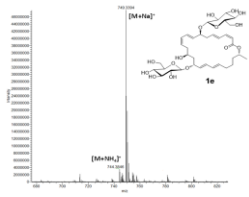   | weak     | 10.1111/1462-2920.13367         | Figure S7  |
| macrolactin 1f |    | weak     | 10.1111/1462-2920.13367         | Figure S8  |
| bacillaenes 4c |    | moderate | 10.1111/1462-2920.13367         | Figure S9  |
| macrolactin 3a |    | weak     | 10.1111/1462-2920.13367         | Figure S10 |
| macrolactin 3b |   | weak     | 10.1111/1462-2920.13367         | Figure S11 |
| aldgamycin P   |  | moderate | 10.1002/cbic.201600118          | Figure S5  |
| borrelidin     |  | strong   | 10.1128/AEM.01383-16            | Figure S6  |
| ibomycin       |  | moderate | 10.1016/j.chembio.1.2016.08.015 | Figure S2  |
| reedsmycin A   |  | moderate | 10.1186/s12934-018-0943-6       | Figure S4  |
| reedsmycin 2   |  | moderate | 10.1186/s12934-018-0943-6       | Figure S4  |
| reedsmycin 3   |  | moderate | 10.1186/s12934-018-0943-6       | Figure S4  |
| reedsmycin 4   |  | moderate | 10.1186/s12934-018-0943-6       | Figure S4  |

|                         |                                                                                     |          |                              |            |
|-------------------------|-------------------------------------------------------------------------------------|----------|------------------------------|------------|
| reedsmycin 5            | 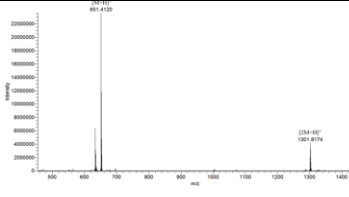   | moderate | 10.1186/s12934-018-0943-6    | Figure S4  |
| caniferolide A          |    | strong   | 10.1039/c8ob03115k           | Figure S9  |
| caniferolide B          |    | strong   | 10.1039/c8ob03115k           | Figure S20 |
| caniferolide C          |    | strong   | 10.1039/c8ob03115k           | Figure S31 |
| caniferolide D          |    | strong   | 10.1039/c8ob03115k           | Figure S42 |
| cyphomycin              |   | strong   | 10.1038/s41467-019-08438-0   | Figure S3  |
| nargenicin-precursors 4 |  | weak     | 10.1038/s41586-019-1021-x    | Figure S3  |
| nargenicin-precursors 5 |  | weak     | 10.1038/s41586-019-1021-x    | Figure S4  |
| nargenicin-precursors 6 |  | weak     | 10.1038/s41586-019-1021-x    | Figure S5  |
| nargenicin-precursors 7 |  | weak     | 10.1038/s41586-019-1021-x    | Figure S6  |
| nargenicin-precursors 8 |  | weak     | 10.1038/s41586-019-1021-x    | Figure S7  |
| lobatamide A            |  | strong   | 10.1002/anie.201916005       | Figure S5  |
| palmerolide A           |  | strong   | 10.3390/md18060298           | Figure 2   |
| epemicin A              |  | strong   | 10.1021/acschembio.1c00318   | Figure S4  |
| epemicin B              |  | strong   | 10.1021/acschembio.1c00318   | Figure S10 |
| venturicidin A          |  | strong   | 10.1021/acs.jnatprod.0c01177 | Figure S2  |

|                                                       |  |          |                              |              |
|-------------------------------------------------------|--|----------|------------------------------|--------------|
| tetramycin A                                          |  | moderate | 10.1007/s00253-020-10391-8   | Figure S2    |
| tetramycin B                                          |  | moderate | 10.1007/s00253-020-10391-8   | Figure S2    |
| nystatin                                              |  | moderate | 10.1007/s00253-020-10391-8   | Figure S2    |
| 12-Decarboxy-12-methyl Tetramycin B                   |  | strong   | 10.1007/s00253-020-10391-8   | Figure S5    |
| 12-Decarboxy-12-methyl Tetramycin A                   |  | strong   | 10.1007/s00253-020-10391-8   | Figure S5    |
| 2-Hydro-3-hydroxy-12-decarboxy-12-methyl Tetramycin A |  | strong   | 10.1007/s00253-020-10391-8   | Figure S5    |
| tartrolon E                                           |  | weak     | 10.1073/pnas.1213892110      | Figure S1-S2 |
| hygrocin K                                            |  | weak     | 10.3390/antibiotic s11111455 | Figure S17   |
| hygrocin L                                            |  | weak     | 10.3390/antibiotic s11111455 | Figure S34   |
| hygrocin M                                            |  | weak     | 10.3390/antibiotic s11111455 | Figure S50   |
| hygrocin N                                            |  | weak     | 10.3390/antibiotic s11111455 | Figure S66   |
| hygrocin O                                            |  | weak     | 10.3390/antibiotic s11111455 | Figure S86   |
| hygrocin P                                            |  | weak     | 10.3390/antibiotic s11111455 | Figure S102  |
| hygrocin Q                                            |  | weak     | 10.3390/antibiotic s11111455 | Figure S116  |

|                                |                                                                                     |          |                                 |             |
|--------------------------------|-------------------------------------------------------------------------------------|----------|---------------------------------|-------------|
| hygrocin R                     | 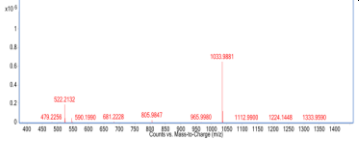  | weak     | 10.3390/antibiotic<br>s11111455 | Figure S130 |
| hygrocin S                     |   | weak     | 10.3390/antibiotic<br>s11111455 | Figure S144 |
| hygrocin T                     |   | weak     | 10.3390/antibiotic<br>s11111455 | Figure S158 |
| hygrocin U                     |   | weak     | 10.3390/antibiotic<br>s11111456 | Figure S167 |
| AP-2                           |   | weak     | 10.1039/c1mb050<br>36b          | Figure S6   |
| AP-3                           |  | weak     | 10.1039/c1mb050<br>36b          | Figure S6   |
| AP-4                           |  | weak     | 10.1039/c1mb050<br>36b          | Figure S6   |
| naphthomycin E                 |  | strong   | 10.1039/c1mb050<br>36b          | Figure S6   |
| naphthomycin A                 |  | strong   | 10.1039/c1mb050<br>36b          | Figure S6   |
| 8-deoxy-rifamycin derivative 1 |  | strong   | 10.3390/biom1009<br>1265        | Figure S9   |
| 8-deoxy-rifamycin derivative 2 |  | moderate | 10.3390/biom1009<br>1265        | Figure S18  |
| 8-deoxy-rifamycin derivative 3 |  | weak     | 10.3390/biom1009<br>1265        | Figure S24  |
| 8-deoxy-rifamycin derivative 4 |  | moderate | 10.3390/biom1009<br>1265        | Figure S30  |

|                                 |                                                                                     |          |                          |            |
|---------------------------------|-------------------------------------------------------------------------------------|----------|--------------------------|------------|
| 8-deoxy-rifamycin derivative 5  | 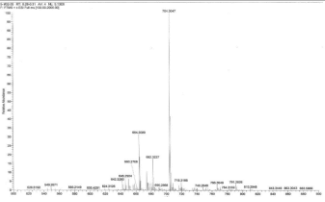   | moderate | 10.3390/biom1009<br>1265 | Figure S36 |
| 8-deoxy-rifamycin derivative 6  |    | weak     | 10.3390/biom1009<br>1265 | Figure S42 |
| 8-deoxy-rifamycin derivative 7  |    | weak     | 10.3390/biom1009<br>1265 | Figure S48 |
| 8-deoxy-rifamycin derivative 8  |   | moderate | 10.3390/biom1009<br>1265 | Figure S49 |
| 8-deoxy-rifamycin derivative 9  |  | moderate | 10.3390/biom1009<br>1265 | Figure S50 |
| 8-deoxy-rifamycin derivative 10 |  | weak     | 10.3390/biom1009<br>1265 | Figure S66 |
| 8-deoxy-rifamycin derivative 11 |  | weak     | 10.3390/biom1009<br>1265 | Figure S67 |
| rifamycin W congener 1          |  | strong   | 10.3390/biom1107<br>0920 | Figure S14 |
| rifamycin W congener 2          |  | strong   | 10.3390/biom1107<br>0920 | Figure S21 |
| rifamycin W congener 3          |  | strong   | 10.3390/biom1107<br>0920 | Figure S28 |
| rifamycin W congener 4          |  | weak     | 10.3390/biom1107<br>0920 | Figure S34 |
| rifamycin W congener 5          |  | weak     | 10.3390/biom1107<br>0920 | Figure S41 |

|                               |  |          |                                  |            |
|-------------------------------|--|----------|----------------------------------|------------|
| rifamycin W<br>congener 6     |  | moderate | 10.3390/biom1107<br>0920         | Figure S48 |
| rifamycin W<br>congener 7     |  | strong   | 10.3390/biom1107<br>0920         | Figure S55 |
| Chaxamycin<br>A               |  | weak     | 10.1021/np20032<br>0u            | Figure S4  |
| Chaxamycin<br>B               |  | weak     | 10.1021/np20032<br>0u            | Figure S11 |
| Chaxamycin<br>C               |  | weak     | 10.1021/np20032<br>0u            | Figure S18 |
| Chaxamycin<br>D               |  | weak     | 10.1021/np20032<br>0u            | Figure S24 |
| ansamitocin<br>P-3            |  | weak     | 10.1002/jssc.2009<br>00746       | Figure 3   |
| streptovaricin<br>analogue 7  |  | weak     | 10.1021/acschem<br>bio.7b00467   | Figure S11 |
| streptovaricin<br>analogue 8  |  | strong   | 10.1021/acschem<br>bio.7b00467   | Figure S11 |
| streptovaricin<br>analogue 9  |  | weak     | 10.1021/acschem<br>bio.7b00467   | Figure S11 |
| streptovaricin<br>analogue 10 |  | weak     | 10.1021/acschem<br>bio.7b00467   | Figure S11 |
| kanglemycin<br>A              |  | weak     | 10.1016/j.molcel.2<br>018.08.028 | Figure S1  |

|                       |                                                                                     |          |                                                                                      |            |                   |                          |
|-----------------------|-------------------------------------------------------------------------------------|----------|--------------------------------------------------------------------------------------|------------|-------------------|--------------------------|
| kendomycin B          | 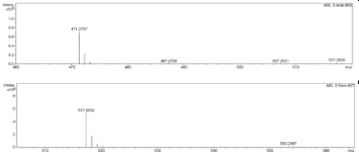  | weak     | 10.1021/acs.jnatprod.9b00654                                                         | Figure S2  |                   |                          |
| kendomycin C          |   | weak     | 10.1021/acs.jnatprod.9b00654                                                         | Figure S3  |                   |                          |
| kendomycin D          |    | weak     | 10.1021/acs.jnatprod.9b00654                                                         | Figure S4  |                   |                          |
| kendomycin E          |    | moderate | 10.3390/molecules.26226834                                                           | Figure S2  |                   |                          |
| aminoansamycin A      |    | weak     | 10.1021/acs.orglett.9b02804                                                          | Figure S10 |                   |                          |
| aminoansamycin B      |    | strong   | 10.1021/acs.orglett.9b02804                                                          | Figure S17 |                   |                          |
| aminoansamycin C      |   | strong   | 10.1021/acs.orglett.9b02804                                                          | Figure S24 |                   |                          |
| aminoansamycin D      |  | weak     | 10.1021/acs.orglett.9b02804                                                          | Figure S31 |                   |                          |
| aminoansamycin E      |  | weak     | 10.1021/acs.orglett.9b02804                                                          | Figure S38 |                   |                          |
| aminoansamycin F      |  | weak     | 10.1021/acs.orglett.9b02804                                                          | Figure S45 |                   |                          |
| aminoansamycin G      |  | weak     | 10.1021/acs.orglett.9b02804                                                          | Figure S52 |                   |                          |
| thailandamide lactone |  | weak     |  | weak       | 10.1021/ja105003g | Figure S19<br>Figure S20 |

Figure S19. MS/MS spectra (positive ions) of thailandamide lactone (2), mol = 714 corresponding to (2019).

Figure S20. MS/MS spectra (negative ions) of thailandamide lactone (2), mol = 712 corresponding to (2019).
